# Supplementary material for: Elevated Nrf-2 responses are insufficient to mitigate protein carbonylation in hepatospecific PTEN deletion mice
Source: PLoS One. 2018 May 25;13(5):e0198139. doi: 10.1371/journal.pone.0198139 (PMC5969769; doi:10.1371/journal.pone.0198139)
Supplement: S2 Table — (XLSX) [file pone.0198139.s003.xlsx]

## Sheet: S2 Table
S2 Table: Carbonylated proteins identified in each genotype using LC-MS
Protein Name	Gene Name	Accession	WT	PTENLKO	MW (Daltons)
14-3-3 protein beta/alpha (Protein kinase C inhibitor protein 1) (KCIP-1) [Cleaved into: 14-3-3 protein beta/alpha, N-terminally processed]	Ywhab	1433B_MOUSE	X	X	28086
14-3-3 protein epsilon (14-3-3E)	Ywhae	1433E_MOUSE	X	X	29174
14-3-3 protein eta	Ywhah	1433F_MOUSE	X	X	28212
14-3-3 protein gamma [Cleaved into: 14-3-3 protein gamma, N-terminally processed]	Ywhag	1433G_MOUSE	X	X	28303
14-3-3 protein theta (14-3-3 protein tau)	Ywhaq	1433T_MOUSE	X	X	27778
14-3-3 protein zeta/delta (Protein kinase C inhibitor protein 1) (KCIP-1) (SEZ-2)	Ywhaz	1433Z_MOUSE	X	X	27771
Serine/threonine-protein phosphatase 2A 65 kDa regulatory subunit A beta isoform (PP2A subunit A isoform PR65-beta) (PP2A subunit A isoform R1-beta)	Ppp2r1b	2AAB_MOUSE	X	X	65934
3-hydroxyanthranilate 3,4-dioxygenase (EC 1.13.11.6) (3-hydroxyanthranilate oxygenase) (3-HAO) (3-hydroxyanthranilic acid dioxygenase) (HAD)	Haao	3HAO_MOUSE	X	X	32804
3-hydroxyisobutyrate dehydrogenase, mitochondrial (HIBADH) (EC 1.1.1.31)	Hibadh	3HIDH_MOUSE	X	X	35440
6-phosphogluconate dehydrogenase, decarboxylating (EC 1.1.1.44)	Pgd	6PGD_MOUSE	X	X	53247
Aldehyde dehydrogenase family 16 member A1	Aldh16a1	A16A1_MOUSE	X	X	84756
Arylacetamide deacetylase (EC 3.1.1.3)	Aadac Aada	AAAD_MOUSE	X	X	45250
Acetoacetyl-CoA synthetase (EC 6.2.1.16)	Aacs	AACS_MOUSE	X	X	75200
Alpha-aminoadipic semialdehyde synthase, mitochondrial (LKR/SDH) [Includes: Lysine ketoglutarate reductase (LKR) (LOR) (EC 1.5.1.8); Saccharopine dehydrogenase (SDH) (EC 1.5.1.9)]	Aass Lorsdh	AASS_MOUSE	X	X	102975
Aspartate aminotransferase, cytoplasmic (cAspAT) (EC 2.6.1.1) (EC 2.6.1.3) (Cysteine aminotransferase, cytoplasmic) (Cysteine transaminase, cytoplasmic) (cCAT) (Glutamate oxaloacetate transaminase 1) (Transaminase A)	Got1	AATC_MOUSE	X	X	46248
Aspartate aminotransferase, mitochondrial (mAspAT) (EC 2.6.1.1) (EC 2.6.1.7) (Fatty acid-binding protein) (FABP-1) (Glutamate oxaloacetate transaminase 2) (Kynurenine aminotransferase 4) (Kynurenine aminotransferase IV) (Kynurenine--oxoglutarate transaminase 4) (Kynurenine--oxoglutarate transaminase IV) (Plasma membrane-associated fatty acid-binding protein) (FABPpm) (Transaminase A)	Got2 Got-2	AATM_MOUSE	X	X	47411
Alpha/beta hydrolase domain-containing protein 14B (Abhydrolase domain-containing protein 14B) (EC 3.-.-.-) (CCG1-interacting factor B)	Abhd14b Cib	ABHEB_MOUSE	X	X	22451
Acetyl-CoA carboxylase 1 (ACC1) (EC 6.4.1.2) (ACC-alpha) (Acetyl-CoA carboxylase 265) [Includes: Biotin carboxylase (EC 6.3.4.14)]	Acaca Acac Gm738	ACACA_MOUSE	X	X	265257
Acyl-CoA dehydrogenase family member 9, mitochondrial (ACAD-9) (EC 1.3.99.-)	Acad9	ACAD9_MOUSE	X	X	68722
Long-chain specific acyl-CoA dehydrogenase, mitochondrial (LCAD) (EC 1.3.8.8)	Acadl	ACADL_MOUSE	X	X	47908
Medium-chain specific acyl-CoA dehydrogenase, mitochondrial (MCAD) (EC 1.3.8.7)	Acadm	ACADM_MOUSE	X	X	46481
Short-chain specific acyl-CoA dehydrogenase, mitochondrial (SCAD) (EC 1.3.8.1) (Butyryl-CoA dehydrogenase)	Acads	ACADS_MOUSE	X	X	44890
Very long-chain specific acyl-CoA dehydrogenase, mitochondrial (EC 1.3.8.9) (MVLCAD) (VLCAD)	Acadvl Vlcad	ACADV_MOUSE	X	X	70875
Acyl-CoA dehydrogenase family member 11 (ACAD-11) (EC 1.3.99.-)	Acad11	ACD11_MOUSE	X	X	87366
ATP-citrate synthase (EC 2.3.3.8) (ATP-citrate (pro-S-)-lyase) (Citrate cleavage enzyme)	Acly	ACLY_MOUSE	X	X	119728
Acyl-coenzyme A thioesterase 13 (Acyl-CoA thioesterase 13) (EC 3.1.2.-) (Thioesterase superfamily member 2)	Acot13 Them2	ACO13_MOUSE	X	X	15183
Cytoplasmic aconitate hydratase (Aconitase) (EC 4.2.1.3) (Citrate hydro-lyase) (Iron regulatory protein 1) (IRP1) (Iron-responsive element-binding protein 1) (IRE-BP 1)	Aco1 Ireb1 Irebp	ACOC_MOUSE	X	X	98126
Aconitate hydratase, mitochondrial (Aconitase) (EC 4.2.1.3) (Citrate hydro-lyase)	Aco2	ACON_MOUSE	X	X	85464
Acyl-coenzyme A thioesterase 2, mitochondrial (Acyl-CoA thioesterase 2) (EC 3.1.2.2) (Acyl coenzyme A thioester hydrolase) (MTE-I) (Very-long-chain acyl-CoA thioesterase)	Acot2 Mte1	ACOT2_MOUSE	X	X	49657
Peroxisomal acyl-coenzyme A oxidase 1 (AOX) (EC 1.3.3.6) (Palmitoyl-CoA oxidase)	Acox1 Acox Paox	ACOX1_MOUSE	X	X	74649
Peroxisomal acyl-coenzyme A oxidase 2 (EC 1.17.99.3) (3-alpha,7-alpha,12-alpha-trihydroxy-5-beta-cholestanoyl-CoA 24-hydroxylase) (3-alpha,7-alpha,12-alpha-trihydroxy-5-beta-cholestanoyl-CoA oxidase) (Trihydroxycoprostanoyl-CoA oxidase) (THCA-CoA oxidase) (THCCox)	Acox2	ACOX2_MOUSE	X	X	76863
Acetyl-coenzyme A synthetase, cytoplasmic (EC 6.2.1.1) (Acetate--CoA ligase) (Acetyl-CoA synthetase) (ACS) (AceCS) (Acyl-CoA synthetase short-chain family member 2) (Acyl-activating enzyme)	Acss2 Acas2 Acecs1	ACSA_MOUSE	X	X	78862
Acyl-CoA synthetase family member 2, mitochondrial (EC 6.2.1.-)	Acsf2	ACSF2_MOUSE	X	X	67951
Long-chain-fatty-acid--CoA ligase 1 (EC 6.2.1.3) (Long-chain acyl-CoA synthetase 1) (LACS 1)	Acsl1 Acsl2 Facl2	ACSL1_MOUSE	X	X	77951
Long-chain-fatty-acid--CoA ligase 5 (EC 6.2.1.3) (Long-chain acyl-CoA synthetase 5) (LACS 5)	Acsl5 Facl5	ACSL5_MOUSE	X	X	76206
Acyl-coenzyme A synthetase ACSM1, mitochondrial (EC 6.2.1.2) (Acyl-CoA synthetase medium-chain family member 1) (Butyrate--CoA ligase 1) (Butyryl-coenzyme A synthetase 1) (Lipoate-activating enzyme) (Middle-chain acyl-CoA synthetase 1)	Acsm1 Bucs1 Lae Macs1	ACSM1_MOUSE	X	X	64760
Acyl-coenzyme A synthetase ACSM5, mitochondrial (EC 6.2.1.2)	Acsm5 Macs3	ACSM5_MOUSE	X	X	64328
Actin, cytoplasmic 1 (Beta-actin) [Cleaved into: Actin, cytoplasmic 1, N-terminally processed]	Actb	ACTB_MOUSE	X	X	41737
Actin, alpha cardiac muscle 1 (Alpha-cardiac actin)	Actc1 Actc	ACTC_MOUSE	X	X	42019
Actin, cytoplasmic 2 (Gamma-actin) [Cleaved into: Actin, cytoplasmic 2, N-terminally processed]	Actg1 Actg	ACTG_MOUSE	X	X	41793
Alpha-actinin-1 (Alpha-actinin cytoskeletal isoform) (F-actin cross-linking protein) (Non-muscle alpha-actinin-1)	Actn1	ACTN1_MOUSE	X	X	103068
Alpha-actinin-4 (Non-muscle alpha-actinin 4)	Actn4	ACTN4_MOUSE	X	X	104977
Alcohol dehydrogenase 1 (EC 1.1.1.1) (ADH-A2) (Alcohol dehydrogenase A subunit)	Adh1 Adh-1	ADH1_MOUSE	X	X	39771
Alcohol dehydrogenase class-3 (EC 1.1.1.1) (Alcohol dehydrogenase 2) (Alcohol dehydrogenase 5) (Alcohol dehydrogenase B2) (ADH-B2) (Alcohol dehydrogenase class-III) (Glutathione-dependent formaldehyde dehydrogenase) (FALDH) (FDH) (GSH-FDH) (EC 1.1.1.-) (S-(hydroxymethyl)glutathione dehydrogenase) (EC 1.1.1.284)	Adh5 Adh-2 Adh2	ADHX_MOUSE	X	X	39548
Adenosine kinase (AK) (EC 2.7.1.20) (Adenosine 5'-phosphotransferase)	Adk	ADK_MOUSE	X	X	40149
ADP/ATP translocase 2 (ADP,ATP carrier protein 2) (Adenine nucleotide translocator 2) (ANT 2) (Solute carrier family 25 member 5) [Cleaved into: ADP/ATP translocase 2, N-terminally processed]	Slc25a5 Ant2	ADT2_MOUSE	X	X	32931
Alanine--glyoxylate aminotransferase 2, mitochondrial (AGT 2) (EC 2.6.1.44) ((R)-3-amino-2-methylpropionate--pyruvate transaminase) (EC 2.6.1.40) (Beta-ALAAT II) (Beta-alanine-pyruvate aminotransferase) (D-AIBAT)	Agxt2	AGT2_MOUSE	X	X	57115
Axin interactor, dorsalization-associated protein (Axin interaction partner and dorsalization antagonist)	Aida	AIDA_MOUSE	X	X	34888
Apoptosis-inducing factor 1, mitochondrial (EC 1.1.1.-) (Programmed cell death protein 8)	Aifm1 Aif Pdcd8	AIFM1_MOUSE	X	X	66765
Alcohol dehydrogenase [NADP(+)] (EC 1.1.1.2) (Aldehyde reductase) (Aldo-keto reductase family 1 member A1)	Akr1a1 Akr1a4	AK1A1_MOUSE	X	X	36587
Aldo-keto reductase family 1 member C13 (EC 1.1.1.-)	Akr1c13	AK1CD_MOUSE	X	X	37058
3-oxo-5-beta-steroid 4-dehydrogenase (EC 1.3.1.3) (Aldo-keto reductase family 1 member D1) (Delta(4)-3-ketosteroid 5-beta-reductase) (Delta(4)-3-oxosteroid 5-beta-reductase)	Akr1d1	AK1D1_MOUSE	X	X	37290
Aldo-keto reductase family 1 member C18 (EC 1.1.-.-) (20-alpha-hydroxysteroid dehydrogenase) (20-alpha-HSD) (EC 1.1.1.149)	Akr1c18	AKC1H_MOUSE	X	X	37177
Retinal dehydrogenase 1 (RALDH 1) (RalDH1) (EC 1.2.1.36) (ALDH-E1) (ALHDII) (Aldehyde dehydrogenase family 1 member A1) (Aldehyde dehydrogenase, cytosolic)	Aldh1a1 Ahd-2 Ahd2 Aldh1	AL1A1_MOUSE	X	X	54468
Aldehyde dehydrogenase family 1 member A3 (EC 1.2.1.5) (Aldehyde dehydrogenase 6) (Retinaldehyde dehydrogenase 3) (RALDH-3) (RalDH3)	Aldh1a3 Aldh6 Raldh3	AL1A3_MOUSE	X	X	56157
Aldehyde dehydrogenase, cytosolic 1 (EC 1.2.1.3) (ALDH class 1) (ALDH-E1) (ALHDII) (Aldehyde dehydrogenase family 1 member A7) (Aldehyde dehydrogenase phenobarbital-inducible)	Aldh1a7 Aldh-pb	AL1A7_MOUSE	X	X	54588
Aldehyde dehydrogenase X, mitochondrial (EC 1.2.1.3) (Aldehyde dehydrogenase family 1 member B1)	Aldh1b1 Aldhx	AL1B1_MOUSE	X	X	57553
Cytosolic 10-formyltetrahydrofolate dehydrogenase (10-FTHFDH) (FDH) (EC 1.5.1.6) (Aldehyde dehydrogenase family 1 member L1)	Aldh1l1 Fthfd	AL1L1_MOUSE	X	X	98709
Mitochondrial 10-formyltetrahydrofolate dehydrogenase (Mitochondrial 10-FTHFDH) (mtFDH) (EC 1.5.1.6) (Aldehyde dehydrogenase family 1 member L2)	Aldh1l2	AL1L2_MOUSE	X	X	101590
Fatty aldehyde dehydrogenase (EC 1.2.1.3) (Aldehyde dehydrogenase 3) (Aldehyde dehydrogenase family 3 member A2)	Aldh3a2 Ahd-3 Ahd3 Aldh3 Aldh4	AL3A2_MOUSE	X	X	53971
Delta-1-pyrroline-5-carboxylate dehydrogenase, mitochondrial (P5C dehydrogenase) (EC 1.2.1.88) (Aldehyde dehydrogenase family 4 member A1) (L-glutamate gamma-semialdehyde dehydrogenase)	Aldh4a1	AL4A1_MOUSE	X	X	61841
Alpha-aminoadipic semialdehyde dehydrogenase (Alpha-AASA dehydrogenase) (EC 1.2.1.31) (Aldehyde dehydrogenase family 7 member A1) (EC 1.2.1.3) (Antiquitin-1) (Betaine aldehyde dehydrogenase) (EC 1.2.1.8) (Delta1-piperideine-6-carboxylate dehydrogenase) (P6c dehydrogenase)	Aldh7a1 Ald7a1	AL7A1_MOUSE	X	X	58861
Aldehyde dehydrogenase family 8 member A1 (EC 1.2.1.-) (Retinal dehydrogenase 4)	Aldh8a1 Raldh4	AL8A1_MOUSE	X	X	53664
4-trimethylaminobutyraldehyde dehydrogenase (TMABADH) (EC 1.2.1.47) (Aldehyde dehydrogenase family 9 member A1) (EC 1.2.1.3)	Aldh9a1	AL9A1_MOUSE	X	X	53515
Alanine aminotransferase 1 (ALT1) (EC 2.6.1.2) (Glutamate pyruvate transaminase 1) (GPT 1) (Glutamic--alanine transaminase 1) (Glutamic--pyruvic transaminase 1)	Gpt Gpt1	ALAT1_MOUSE	X	X	55143
Serum albumin	Alb Alb-1 Alb1	ALBU_MOUSE	X	X	68693
Aldehyde dehydrogenase, mitochondrial (EC 1.2.1.3) (AHD-M1) (ALDH class 2) (ALDH-E2) (ALDHI)	Aldh2 Ahd-1 Ahd1	ALDH2_MOUSE	X	X	56538
Fructose-bisphosphate aldolase A (EC 4.1.2.13) (Aldolase 1) (Muscle-type aldolase)	Aldoa Aldo1	ALDOA_MOUSE	X	X	39356
Fructose-bisphosphate aldolase B (EC 4.1.2.13) (Aldolase 2) (Liver-type aldolase)	Aldob Aldo2	ALDOB_MOUSE	X	X	39507
Cytosol aminopeptidase (EC 3.4.11.1) (Leucine aminopeptidase 3) (LAP-3) (Leucyl aminopeptidase) (Proline aminopeptidase) (EC 3.4.11.5) (Prolyl aminopeptidase)	Lap3 Lapep	AMPL_MOUSE	X	X	56141
Annexin A2 (Annexin II) (Annexin-2) (Calpactin I heavy chain) (Calpactin-1 heavy chain) (Chromobindin-8) (Lipocortin II) (Placental anticoagulant protein IV) (PAP-IV) (Protein I) (p36)	Anxa2 Anx2 Cal1h	ANXA2_MOUSE	X	X	38676
Annexin A3 (35-alpha calcimedin) (Annexin III) (Annexin-3) (Lipocortin III) (Placental anticoagulant protein III) (PAP-III)	Anxa3 Anx3	ANXA3_MOUSE	X	X	36384
Annexin A4 (Annexin IV) (Annexin-4)	Anxa4 Anx4	ANXA4_MOUSE	X	X	35916
Annexin A5 (Anchorin CII) (Annexin V) (Annexin-5) (Calphobindin I) (CBP-I) (Endonexin II) (Lipocortin V) (Placental anticoagulant protein 4) (PP4) (Placental anticoagulant protein I) (PAP-I) (Thromboplastin inhibitor) (Vascular anticoagulant-alpha) (VAC-alpha)	Anxa5 Anx5	ANXA5_MOUSE	X	X	35752
Annexin A6 (67 kDa calelectrin) (Annexin VI) (Annexin-6) (Calphobindin-II) (CPB-II) (Chromobindin-20) (Lipocortin VI) (Protein III) (p68) (p70)	Anxa6 Anx6	ANXA6_MOUSE	X	X	75885
Annexin A7 (Annexin VII) (Annexin-7) (Synexin)	Anxa7 Anx7	ANXA7_MOUSE	X	X	49925
Amine oxidase [flavin-containing] B (EC 1.4.3.4) (Monoamine oxidase type B) (MAO-B)	Maob	AOFB_MOUSE	X	X	58558
Aldehyde oxidase 3 (EC 1.2.3.1) (Aldehyde oxidase homolog 1) (Azaheterocycle hydroxylase 3) (EC 1.17.3.-)	Aox3 Aoh1	AOXC_MOUSE	X	X	146902
AP-1 complex subunit beta-1 (Adaptor protein complex AP-1 subunit beta-1) (Adaptor-related protein complex 1 subunit beta-1) (Beta-1-adaptin) (Beta-adaptin 1) (Clathrin assembly protein complex 1 beta large chain) (Golgi adaptor HA1/AP1 adaptin beta subunit)	Ap1b1 Adtb1	AP1B1_MOUSE	X	X	103935
AP-2 complex subunit alpha-2 (100 kDa coated vesicle protein C) (Adaptor protein complex AP-2 subunit alpha-2) (Adaptor-related protein complex 2 subunit alpha-2) (Alpha-adaptin C) (Alpha2-adaptin) (Clathrin assembly protein complex 2 alpha-C large chain) (Plasma membrane adaptor HA2/AP2 adaptin alpha C subunit)	Ap2a2 Adtab	AP2A2_MOUSE	X	X	104017
AP-2 complex subunit beta (AP105B) (Adaptor protein complex AP-2 subunit beta) (Adaptor-related protein complex 2 subunit beta) (Beta-2-adaptin) (Beta-adaptin) (Clathrin assembly protein complex 2 beta large chain) (Plasma membrane adaptor HA2/AP2 adaptin beta subunit)	Ap2b1 Clapb1	AP2B1_MOUSE	X	X	104583
Apolipoprotein A-I (Apo-AI) (ApoA-I) (Apolipoprotein A1) [Cleaved into: Proapolipoprotein A-I (ProapoA-I); Truncated apolipoprotein A-I]	Apoa1	APOA1_MOUSE	X	X	30616
Apolipoprotein A-IV (Apo-AIV) (ApoA-IV) (Apolipoprotein A4)	Apoa4	APOA4_MOUSE	X	X	45029
Apolipoprotein E (Apo-E)	Apoe	APOE_MOUSE	X	X	35867
Aquaporin-1 (AQP-1) (Aquaporin-CHIP) (Delayed early response protein 2) (DER2) (Water channel protein for red blood cells and kidney proximal tubule)	Aqp1	AQP1_MOUSE	X	X	28793
Actin-related protein 2/3 complex subunit 1B (Arp2/3 complex 41 kDa subunit) (p41-ARC)	Arpc1b	ARC1B_MOUSE	X	X	41064
ADP-ribosylation factor 2	Arf2	ARF2_MOUSE	X	X	20746
ADP-ribosylation factor 3	Arf3	ARF3_MOUSE	X	X	20601
Arginase-1 (EC 3.5.3.1) (Liver-type arginase) (Type I arginase)	Arg1	ARGI1_MOUSE	X	X	34808
Aflatoxin B1 aldehyde reductase member 2 (EC 1.1.1.n11) (Succinic semialdehyde reductase) (SSA reductase)	Akr7a2 Afar Akr7a5	ARK72_MOUSE	X	X	40612
Argininosuccinate lyase (ASAL) (EC 4.3.2.1) (Arginosuccinase)	Asl	ARLY_MOUSE	X	X	51739
Actin-related protein 2 (Actin-like protein 2)	Actr2 Arp2	ARP2_MOUSE	X	X	44761
Actin-related protein 3 (Actin-like protein 3)	Actr3 Arp3	ARP3_MOUSE	X	X	47357
Actin-related protein 2/3 complex subunit 4 (Arp2/3 complex 20 kDa subunit) (p20-ARC)	Arpc4 Arc20	ARPC4_MOUSE	X	X	19667
Arsenite methyltransferase (EC 2.1.1.137) (Methylarsonite methyltransferase) (S-adenosyl-L-methionine:arsenic(III) methyltransferase)	As3mt Cyt19	AS3MT_MOUSE	X	X	41794
Putative L-aspartate dehydrogenase (EC 1.4.1.21) (Aspartate dehydrogenase domain-containing protein)	Aspdh	ASPD_MOUSE	X	X	30270
Argininosuccinate synthase (EC 6.3.4.5) (Citrulline--aspartate ligase)	Ass1 Ass	ASSY_MOUSE	X	X	46584
ATP synthase subunit alpha, mitochondrial	Atp5a1	ATPA_MOUSE	X	X	59753
ATP synthase subunit beta, mitochondrial (EC 3.6.3.14)	Atp5b	ATPB_MOUSE	X	X	56300
ATP synthase subunit gamma, mitochondrial (F-ATPase gamma subunit)	Atp5c1	ATPG_MOUSE	X	X	32886
ATP synthase subunit f, mitochondrial	Atp5j2	ATPK_MOUSE	X	X	10344
ATP synthase subunit O, mitochondrial (Oligomycin sensitivity conferral protein) (OSCP)	Atp5o D12Wsu28e	ATPO_MOUSE	X	X	23364
Bile acid-CoA:amino acid N-acyltransferase (BACAT) (BAT) (EC 2.3.1.65) (Glycine N-choloyltransferase) (Long-chain fatty-acyl-CoA hydrolase) (EC 3.1.2.2)	Baat	BAAT_MOUSE	X	X	46482
D-beta-hydroxybutyrate dehydrogenase, mitochondrial (BDH) (EC 1.1.1.30) (3-hydroxybutyrate dehydrogenase)	Bdh1 Bdh	BDH_MOUSE	X	X	38299
Betaine--homocysteine S-methyltransferase 1 (EC 2.1.1.5)	Bhmt	BHMT1_MOUSE	X	X	45021
Flavin reductase (NADPH) (FR) (EC 1.5.1.30) (Biliverdin reductase B) (BVR-B) (EC 1.3.1.24) (Biliverdin-IX beta-reductase) (NADPH-dependent diaphorase) (NADPH-flavin reductase) (FLR)	Blvrb	BLVRB_MOUSE	X	X	22197
Gamma-butyrobetaine dioxygenase (EC 1.14.11.1) (Gamma-butyrobetaine hydroxylase) (Gamma-BBH) (Gamma-butyrobetaine,2-oxoglutarate dioxygenase)	Bbox1	BODG_MOUSE	X	X	44699
Valacyclovir hydrolase (VACVase) (Valacyclovirase) (EC 3.1.-.-) (Biphenyl hydrolase-like protein)	Bphl	BPHL_MOUSE	X	X	32851
3'(2'),5'-bisphosphate nucleotidase 1 (EC 3.1.3.7) (Bisphosphate 3'-nucleotidase 1) (PAP-inositol 1,4-phosphatase) (PIP)	Bpnt1	BPNT1_MOUSE	X	X	33196
Mitotic checkpoint protein BUB3 (WD repeat type I transmembrane protein A72.5)	Bub3	BUB3_MOUSE	X	X	36955
Complement component 1 Q subcomponent-binding protein, mitochondrial (GC1q-R protein) (Glycoprotein gC1qBP) (C1qBP)	C1qbp Gc1qbp	C1QBP_MOUSE	X	X	31013
C-1-tetrahydrofolate synthase, cytoplasmic (C1-THF synthase) [Cleaved into: C-1-tetrahydrofolate synthase, cytoplasmic, N-terminally processed] [Includes: Methylenetetrahydrofolate dehydrogenase (EC 1.5.1.5); Methenyltetrahydrofolate cyclohydrolase (EC 3.5.4.9); Formyltetrahydrofolate synthetase (EC 6.3.4.3)]	Mthfd1	C1TC_MOUSE	X	X	101200
C2 domain-containing protein 2-like (Transmembrane protein 24)	C2cd2l Tmem24	C2C2L_MOUSE	X	X	76329
Carbonic anhydrase 3 (EC 4.2.1.1) (Carbonate dehydratase III) (Carbonic anhydrase III) (CA-III)	Ca3 Car3	CAH3_MOUSE	X	X	29366
Calreticulin (CRP55) (Calregulin) (Endoplasmic reticulum resident protein 60) (ERp60) (HACBP)	Calr	CALR_MOUSE	X	X	47995
Cullin-associated NEDD8-dissociated protein 1 (Cullin-associated and neddylation-dissociated protein 1) (p120 CAND1)	Cand1 D10Ertd516e Kiaa0829	CAND1_MOUSE	X	X	136332
Adenylyl cyclase-associated protein 1 (CAP 1)	Cap1 Cap	CAP1_MOUSE	X	X	51565
Catalase (EC 1.11.1.6)	Cat Cas-1 Cas1	CATA_MOUSE	X	X	59795
Cathepsin B (EC 3.4.22.1) (Cathepsin B1) [Cleaved into: Cathepsin B light chain; Cathepsin B heavy chain]	Ctsb	CATB_MOUSE	X	X	37280
Cathepsin D (EC 3.4.23.5)	Ctsd	CATD_MOUSE	X	X	44954
Carbonyl reductase [NADPH] 1 (EC 1.1.1.184) (15-hydroxyprostaglandin dehydrogenase [NADP(+)]) (EC 1.1.1.197) (NADPH-dependent carbonyl reductase 1) (Prostaglandin 9-ketoreductase) (Prostaglandin-E(2) 9-reductase) (EC 1.1.1.189)	Cbr1 Cbr	CBR1_MOUSE	X	X	30641
Cystathionine beta-synthase (EC 4.2.1.22) (Beta-thionase) (Serine sulfhydrase)	Cbs	CBS_MOUSE	X	X	61544
Cell division control protein 42 homolog (G25K GTP-binding protein)	Cdc42	CDC42_MOUSE	X	X	21259
Ceruloplasmin (EC 1.16.3.1) (Ferroxidase)	Cp	CERU_MOUSE	X	X	121151
Carboxylesterase 1D (Carboxylesterase 3) (EC 3.1.1.1) (EC 3.1.1.67) (Fatty acid ethyl ester synthase) (FAEE synthase) (Triacylglycerol hydrolase) (TGH)	Ces1d Ces1 Ces3	CES1D_MOUSE	X	X	61788
Carboxylesterase 1F (EC 3.1.1.1) (Carboxylic ester hydrolase) (Triacylglycerol hydrolase 2) (TGH-2)	Ces1f CesML1	CES1F_MOUSE	X	X	61612
Cystathionine gamma-lyase (EC 4.4.1.1) (Cysteine-protein sulfhydrase) (Gamma-cystathionase)	Cth	CGL_MOUSE	X	X	43567
60 kDa heat shock protein, mitochondrial (60 kDa chaperonin) (Chaperonin 60) (CPN60) (HSP-65) (Heat shock protein 60) (HSP-60) (Hsp60) (Mitochondrial matrix protein P1)	Hspd1 Hsp60	CH60_MOUSE	X	X	60955
Chromodomain-helicase-DNA-binding protein 7 (CHD-7) (EC 3.6.4.12) (ATP-dependent helicase CHD7)	Chd7	CHD7_MOUSE	X	X	334061
Chromodomain-helicase-DNA-binding protein 8 (CHD-8) (EC 3.6.4.12) (ATP-dependent helicase CHD8) (Axis duplication inhibitor) (Duplin)	Chd8 Kiaa1564	CHD8_MOUSE	X	X	290847
Choline dehydrogenase, mitochondrial (CDH) (CHD) (EC 1.1.99.1)	Chdh	CHDH_MOUSE	X	X	66415
Citrate synthase, mitochondrial (EC 2.3.3.1) (Citrate (Si)-synthase)	Cs	CISY_MOUSE	X	X	51737
Ester hydrolase C11orf54 homolog (EC 3.1.-.-)	0	CK054_MOUSE	X	X	34996
Clathrin heavy chain 1	Cltc	CLH1_MOUSE	X	X	191557
Chloride intracellular channel protein 4 (mc3s5/mtCLIC)	Clic4	CLIC4_MOUSE	X	X	28729
Clustered mitochondria protein homolog	Cluh Kiaa0664	CLU_MOUSE	X	X	148068
Clusterin (Apolipoprotein J) (Apo-J) (Clustrin) (Sulfated glycoprotein 2) (SGP-2) [Cleaved into: Clusterin beta chain; Clusterin alpha chain]	Clu Apoj Msgp-2	CLUS_MOUSE	X	X	51656
Citrate lyase subunit beta-like protein, mitochondrial (Citrate lyase beta-like) (Beta-methylmalate synthase) (EC 2.3.3.-) (Malate synthase) (EC 2.3.3.9)	Clybl Clb	CLYBL_MOUSE	X	X	37549
Carboxymethylenebutenolidase homolog (EC 3.1.-.-)	Cmbl	CMBL_MOUSE	X	X	27902
Calcium-binding mitochondrial carrier protein Aralar2 (Citrin) (Mitochondrial aspartate glutamate carrier 2) (Solute carrier family 25 member 13)	Slc25a13 Aralar2	CMC2_MOUSE	X	X	74467
Complement C2 (EC 3.4.21.43) (C3/C5 convertase) [Cleaved into: Complement C2b fragment; Complement C2a fragment]	C2	CO2_MOUSE	X	X	84741
Complement C3 (HSE-MSF) [Cleaved into: Complement C3 beta chain; C3-beta-c (C3bc); Complement C3 alpha chain; C3a anaphylatoxin; Acylation stimulating protein (ASP) (C3adesArg); Complement C3b alpha' chain; Complement C3c alpha' chain fragment 1; Complement C3dg fragment; Complement C3g fragment; Complement C3d fragment; Complement C3f fragment; Complement C3c alpha' chain fragment 2]	C3	CO3_MOUSE	X	X	186484
Complement component C9	C9	CO9_MOUSE	X	X	62002
Bifunctional coenzyme A synthase (CoA synthase) [Includes: Phosphopantetheine adenylyltransferase (EC 2.7.7.3) (Dephospho-CoA pyrophosphorylase) (Pantetheine-phosphate adenylyltransferase) (PPAT); Dephospho-CoA kinase (DPCK) (EC 2.7.1.24) (Dephosphocoenzyme A kinase) (DPCOAK)]	Coasy Ukr1	COASY_MOUSE	X	X	62023
Cofilin-1 (Cofilin, non-muscle isoform)	Cfl1	COF1_MOUSE	X	X	18560
Catechol O-methyltransferase (EC 2.1.1.6)	Comt Comt1	COMT_MOUSE	X	X	29486
Coatomer subunit beta' (Beta'-coat protein) (Beta'-COP) (p102)	Copb2	COPB2_MOUSE	X	X	102449
Coatomer subunit delta (Archain) (Delta-coat protein) (Delta-COP)	Arcn1 Copd	COPD_MOUSE	X	X	57229
Coatomer subunit gamma-1 (Gamma-1-coat protein) (Gamma-1-COP)	Copg1 Copg	COPG1_MOUSE	X	X	97513
Coronin-1A (Coronin-like protein A) (Clipin-A) (Coronin-like protein p57) (Tryptophan aspartate-containing coat protein) (TACO)	Coro1a Coro1	COR1A_MOUSE	X	X	50989
Cytochrome c oxidase subunit 4 isoform 1, mitochondrial (Cytochrome c oxidase polypeptide IV) (Cytochrome c oxidase subunit IV isoform 1) (COX IV-1)	Cox4i1 Cox4 Cox4a	COX41_MOUSE	X	X	19530
UPF0585 protein C16orf13 homolog	0	CP013_MOUSE	X	X	22687
Sterol 26-hydroxylase, mitochondrial (EC 1.14.13.15) (5-beta-cholestane-3-alpha,7-alpha,12-alpha-triol 27-hydroxylase) (Cytochrome P-450C27/25) (Cytochrome P450 27) (Sterol 27-hydroxylase) (Vitamin D(3) 25-hydroxylase)	Cyp27a1	CP27A_MOUSE	X	X	60720
Cytochrome P450 2D9 (EC 1.14.14.1) (CYPIID9) (Cytochrome P450-16-alpha) (Cytochrome P450CA) (Testosterone 16-alpha hydroxylase)	Cyp2d9 Cyp2d-9	CP2D9_MOUSE	X	X	56950
Cytochrome P450 2D10 (EC 1.14.14.1) (CYPIID10) (Cytochrome P450-16-alpha) (Cytochrome P450CB) (Testosterone 16-alpha hydroxylase)	Cyp2d10 Cyp2d-10	CP2DA_MOUSE	X	X	57233
Cytochrome P450 2D26 (EC 1.14.14.1) (CYPIID26)	Cyp2d26 Cyp2d-26	CP2DQ_MOUSE	X	X	56976
Cytochrome P450 2E1 (EC 1.14.13.-) (4-nitrophenol 2-hydroxylase) (EC 1.14.13.n7) (CYPIIE1) (Cytochrome P450-ALC) (Cytochrome P450-J)	Cyp2e1 Cyp2e Cyp2e-1	CP2E1_MOUSE	X	X	56805
Cytochrome P450 2F2 (EC 1.14.14.-) (CYPIIF2) (Cytochrome P450-NAH-2) (Naphthalene dehydrogenase) (Naphthalene hydroxylase)	Cyp2f2 Cyp2f-2	CP2F2_MOUSE	X	X	55949
Copine-1 (Copine I)	Cpne1	CPNE1_MOUSE	X	X	58887
Copine-3 (Copine III)	Cpne3 Kiaa0636	CPNE3_MOUSE	X	X	59585
Carbamoyl-phosphate synthase [ammonia], mitochondrial (EC 6.3.4.16) (Carbamoyl-phosphate synthetase I) (CPSase I)	Cps1	CPSM_MOUSE	X	X	164618
Carnitine O-palmitoyltransferase 2, mitochondrial (EC 2.3.1.21) (Carnitine palmitoyltransferase II) (CPT II)	Cpt2 Cpt-2	CPT2_MOUSE	X	X	73981
Cysteine sulfinic acid decarboxylase (EC 4.1.1.29) (Cysteine-sulfinate decarboxylase) (Sulfinoalanine decarboxylase)	Csad	CSAD_MOUSE	X	X	55145
COP9 signalosome complex subunit 1 (SGN1) (Signalosome subunit 1) (G protein pathway suppressor 1) (GPS-1) (JAB1-containing signalosome subunit 1)	Gps1 Cops1 Csn1	CSN1_MOUSE	X	X	53442
COP9 signalosome complex subunit 5 (SGN5) (Signalosome subunit 5) (EC 3.4.-.-) (Jun activation domain-binding protein 1) (Kip1 C-terminus-interacting protein 2)	Cops5 Csn5 Jab1 Kic2	CSN5_MOUSE	X	X	37549
Catenin alpha-1 (102 kDa cadherin-associated protein) (Alpha E-catenin) (CAP102)	Ctnna1 Catna1	CTNA1_MOUSE	X	X	100106
Cytochrome b5	Cyb5a Cyb5	CYB5_MOUSE	X	X	15241
Cytoplasmic dynein 1 intermediate chain 2 (Cytoplasmic dynein intermediate chain 2) (Dynein intermediate chain 2, cytosolic) (DH IC-2)	Dync1i2 Dnci2 Dncic2	DC1I2_MOUSE	X	X	68394
Malonyl-CoA decarboxylase, mitochondrial (MCD) (EC 4.1.1.9)	Mlycd	DCMC_MOUSE	X	X	54736
m7GpppX diphosphatase (EC 3.6.1.59) (DCS-1) (Decapping scavenger enzyme) (Hint-related 7meGMP-directed hydrolase) (Histidine triad nucleotide-binding protein 5) (Histidine triad protein member 5) (HINT-5) (Scavenger mRNA-decapping enzyme DcpS)	Dcps Dcs1 Hint5	DCPS_MOUSE	X	X	38988
Uroporphyrinogen decarboxylase (UPD) (URO-D) (EC 4.1.1.37)	Urod	DCUP_MOUSE	X	X	40692
N(G),N(G)-dimethylarginine dimethylaminohydrolase 1 (DDAH-1) (Dimethylarginine dimethylaminohydrolase 1) (EC 3.5.3.18) (DDAHI) (Dimethylargininase-1)	Ddah1	DDAH1_MOUSE	X	X	31381
N(G),N(G)-dimethylarginine dimethylaminohydrolase 2 (DDAH-2) (Dimethylarginine dimethylaminohydrolase 2) (EC 3.5.3.18) (DDAHII) (Dimethylargininase-2)	Ddah2	DDAH2_MOUSE	X	X	29646
DNA damage-binding protein 1 (DDB p127 subunit) (Damage-specific DNA-binding protein 1) (UV-damaged DNA-binding factor)	Ddb1	DDB1_MOUSE	X	X	126853
Aromatic-L-amino-acid decarboxylase (AADC) (EC 4.1.1.28) (DOPA decarboxylase) (DDC)	Ddc	DDC_MOUSE	X	X	53874
2,4-dienoyl-CoA reductase, mitochondrial (EC 1.3.1.34) (2,4-dienoyl-CoA reductase [NADPH]) (4-enoyl-CoA reductase [NADPH])	Decr1	DECR_MOUSE	X	X	36214
Peroxisomal 2,4-dienoyl-CoA reductase (EC 1.3.1.34) (2,4-dienoyl-CoA reductase 2)	Decr2 Pdcr	DECR2_MOUSE	X	X	31300
Destrin (Actin-depolymerizing factor) (ADF) (Sid 23)	Dstn Dsn Sid23	DEST_MOUSE	X	X	18522
Peroxisomal multifunctional enzyme type 2 (MFE-2) (17-beta-hydroxysteroid dehydrogenase 4) (17-beta-HSD 4) (D-bifunctional protein) (DBP) (Multifunctional protein 2) (MPF-2) [Cleaved into: (3R)-hydroxyacyl-CoA dehydrogenase (EC 1.1.1.n12); Enoyl-CoA hydratase 2 (EC 4.2.1.107) (EC 4.2.1.119) (3-alpha,7-alpha,12-alpha-trihydroxy-5-beta-cholest-24-enoyl-CoA hydratase)]	Hsd17b4 Edh17b4	DHB4_MOUSE	X	X	79482
Estradiol 17 beta-dehydrogenase 5 (EC 1.1.1.-) (17-beta-HSD 5)	Akr1c6 Hsd17b5	DHB5_MOUSE	X	X	37048
Estradiol 17-beta-dehydrogenase 8 (EC 1.1.1.62) (17-beta-hydroxysteroid dehydrogenase 8) (17-beta-HSD 8) (3-oxoacyl-[acyl-carrier-protein] reductase) (EC 1.1.1.-) (Protein Ke6) (Ke-6) (Testosterone 17-beta-dehydrogenase 8) (EC 1.1.1.239)	Hsd17b8 H2-Ke6 Hke6	DHB8_MOUSE	X	X	26588
Trans-1,2-dihydrobenzene-1,2-diol dehydrogenase (EC 1.3.1.20) (D-xylose 1-dehydrogenase) (D-xylose-NADP dehydrogenase) (EC 1.1.1.179) (Dimeric dihydrodiol dehydrogenase)	Dhdh	DHDH_MOUSE	X	X	36301
Glutamate dehydrogenase 1, mitochondrial (GDH 1) (EC 1.4.1.3)	Glud1 Glud	DHE3_MOUSE	X	X	61337
Corticosteroid 11-beta-dehydrogenase isozyme 1 (EC 1.1.1.146) (11-beta-hydroxysteroid dehydrogenase 1) (11-DH) (11-beta-HSD1) (11beta-HSD1A)	Hsd11b1 Hsd11	DHI1_MOUSE	X	X	32364
Dihydropteridine reductase (EC 1.5.1.34) (HDHPR) (Quinoid dihydropteridine reductase)	Qdpr Dhpr	DHPR_MOUSE	X	X	25570
Dehydrogenase/reductase SDR family member 1 (EC 1.1.-.-)	Dhrs1 D14ertd484e	DHRS1_MOUSE	X	X	34005
Sorbitol dehydrogenase (EC 1.1.1.14) (L-iditol 2-dehydrogenase)	Sord Sdh1	DHSO_MOUSE	X	X	38249
Probable 2-oxoglutarate dehydrogenase E1 component DHKTD1, mitochondrial (EC 1.2.4.2) (Dehydrogenase E1 and transketolase domain-containing protein 1)	Dhtkd1 Kiaa1630	DHTK1_MOUSE	X	X	102793
ATP-dependent RNA helicase Dhx29 (EC 3.6.4.13) (DEAH box protein 29)	Dhx29	DHX29_MOUSE	X	X	153975
ATP-dependent RNA helicase A (RHA) (EC 3.6.4.13) (DEAH box protein 9) (mHEL-5) (Nuclear DNA helicase II) (NDH II)	Dhx9 Ddx9	DHX9_MOUSE	X	X	149475
Dihydrolipoyl dehydrogenase, mitochondrial (EC 1.8.1.4) (Dihydrolipoamide dehydrogenase)	Dld	DLDH_MOUSE	X	X	54272
DnaJ homolog subfamily A member 1 (DnaJ protein homolog 2) (Heat shock 40 kDa protein 4) (Heat shock protein J2) (HSJ-2)	Dnaja1 Dnaj2 Hsj2 Hspf4	DNJA1_MOUSE	X	X	44868
Dipeptidyl peptidase 2 (EC 3.4.14.2) (Dipeptidyl aminopeptidase II) (Dipeptidyl peptidase 7) (Dipeptidyl peptidase II) (DPP II) (Quiescent cell proline dipeptidase)	Dpp7 Dpp2 Qpp	DPP2_MOUSE	X	X	56254
Dipeptidyl peptidase 3 (EC 3.4.14.4) (Dipeptidyl aminopeptidase III) (Dipeptidyl arylamidase III) (Dipeptidyl peptidase III) (DPP III) (Enkephalinase B)	Dpp3	DPP3_MOUSE	X	X	82898
Dihydropyrimidine dehydrogenase [NADP(+)] (DHPDHase) (DPD) (EC 1.3.1.2) (Dihydrothymine dehydrogenase) (Dihydrouracil dehydrogenase)	Dpyd	DPYD_MOUSE	X	X	111253
Dihydropyrimidinase (DHP) (DHPase) (EC 3.5.2.2) (Dihydropyrimidine amidohydrolase) (Hydantoinase)	Dpys	DPYS_MOUSE	X	X	56725
Spliceosome RNA helicase Ddx39b (EC 3.6.4.13) (56 kDa U2AF65-associated protein) (DEAD box protein UAP56) (HLA-B-associated transcript 1 protein)	Ddx39b Bat1 Bat1a Uap56	DX39B_MOUSE	X	X	49035
Dynein heavy chain 5, axonemal (Axonemal beta dynein heavy chain 5) (mDNAH5) (Ciliary dynein heavy chain 5)	Dnah5 Dnahc5	DYH5_MOUSE	X	X	527558
Dynein heavy chain 8, axonemal (Axonemal beta dynein heavy chain 8) (Ciliary dynein heavy chain 8)	Dnah8 Dnahc8	DYH8_MOUSE	X	X	541238
Dihydrofolate reductase (EC 1.5.1.3)	Dhfr	DYR_MOUSE	X	X	21606
Delta(3,5)-Delta(2,4)-dienoyl-CoA isomerase, mitochondrial (EC 5.3.3.-)	Ech1	ECH1_MOUSE	X	X	36118
Trifunctional enzyme subunit alpha, mitochondrial (TP-alpha) [Includes: Long-chain enoyl-CoA hydratase (EC 4.2.1.17); Long chain 3-hydroxyacyl-CoA dehydrogenase (EC 1.1.1.211)]	Hadha	ECHA_MOUSE	X	X	82670
Trifunctional enzyme subunit beta, mitochondrial (TP-beta) [Includes: 3-ketoacyl-CoA thiolase (EC 2.3.1.16) (Acetyl-CoA acyltransferase) (Beta-ketothiolase)]	Hadhb	ECHB_MOUSE	X	X	51386
Ethylmalonyl-CoA decarboxylase (EC 4.1.1.94) (Enoyl-CoA hydratase domain-containing protein 1) (Methylmalonyl-CoA decarboxylase) (MMCD) (EC 4.1.1.41)	Echdc1	ECHD1_MOUSE	X	X	35467
Enoyl-CoA hydratase domain-containing protein 2, mitochondrial	Echdc2 D4Ertd765e	ECHD2_MOUSE	X	X	31852
Enoyl-CoA hydratase, mitochondrial (EC 4.2.1.17) (Enoyl-CoA hydratase 1) (Short-chain enoyl-CoA hydratase) (SCEH)	Echs1	ECHM_MOUSE	X	X	31474
Peroxisomal bifunctional enzyme (PBE) (PBFE) [Includes: Enoyl-CoA hydratase/3,2-trans-enoyl-CoA isomerase (EC 4.2.1.17) (EC 5.3.3.8); 3-hydroxyacyl-CoA dehydrogenase (EC 1.1.1.35)]	Ehhadh	ECHP_MOUSE	X	X	78301
Enoyl-CoA delta isomerase 1, mitochondrial (EC 5.3.3.8) (3,2-trans-enoyl-CoA isomerase) (Delta(3),Delta(2)-enoyl-CoA isomerase) (D3,D2-enoyl-CoA isomerase) (Dodecenoyl-CoA isomerase)	Eci1 Dci	ECI1_MOUSE	X	X	32250
Elongation factor 1-alpha 1 (EF-1-alpha-1) (Elongation factor Tu) (EF-Tu) (Eukaryotic elongation factor 1 A-1) (eEF1A-1)	Eef1a1 Eef1a	EF1A1_MOUSE	X	X	50114
Elongation factor 1-beta (EF-1-beta)	Eef1b Eef1b2	EF1B_MOUSE	X	X	24694
Elongation factor 1-delta (EF-1-delta)	Eef1d	EF1D_MOUSE	X	X	31293
Elongation factor 1-gamma (EF-1-gamma) (eEF-1B gamma)	Eef1g	EF1G_MOUSE	X	X	50061
Elongation factor 2 (EF-2)	Eef2	EF2_MOUSE	X	X	95314
Elongation factor Tu, mitochondrial	Tufm	EFTU_MOUSE	X	X	49508
Eukaryotic translation initiation factor 3 subunit B (eIF3b) (Eukaryotic translation initiation factor 3 subunit 9) (eIF-3-eta) (eIF3 p116)	Eif3b Eif3s9	EIF3B_MOUSE	X	X	91370
Eukaryotic translation initiation factor 3 subunit C (eIF3c) (Eukaryotic translation initiation factor 3 subunit 8) (eIF3 p110)	Eif3c Eif3s8	EIF3C_MOUSE	X	X	105531
Eukaryotic translation initiation factor 3 subunit I (eIF3i) (Eukaryotic translation initiation factor 3 subunit 2) (TGF-beta receptor-interacting protein 1) (TRIP-1) (eIF-3-beta) (eIF3 p36)	Eif3i Eif3s2 Trip1	EIF3I_MOUSE	X	X	36461
Eukaryotic translation initiation factor 3 subunit L (eIF3l) (66 kDa tyrosine-rich heat shock protein) (67 kDa polymerase-associated factor) (Eukaryotic translation initiation factor 3 subunit 6-interacting protein) (Eukaryotic translation initiation factor 3 subunit E-interacting protein) (HSP-66Y) (PAF67)	Eif3l Eif3eip Eif3s6ip Paf67	EIF3L_MOUSE	X	X	66613
Alpha-enolase (EC 4.2.1.11) (2-phospho-D-glycerate hydro-lyase) (Enolase 1) (Non-neural enolase) (NNE)	Eno1 Eno-1	ENOA_MOUSE	X	X	47141
Beta-enolase (EC 4.2.1.11) (2-phospho-D-glycerate hydro-lyase) (Enolase 3) (Muscle-specific enolase) (MSE) (Skeletal muscle enolase)	Eno3 Eno-3	ENOB_MOUSE	X	X	47025
Gamma-enolase (EC 4.2.1.11) (2-phospho-D-glycerate hydro-lyase) (Enolase 2) (Neural enolase) (Neuron-specific enolase) (NSE)	Eno2 Eno-2	ENOG_MOUSE	X	X	47297
Endoplasmin (94 kDa glucose-regulated protein) (GRP-94) (Endoplasmic reticulum resident protein 99) (ERp99) (Heat shock protein 90 kDa beta member 1) (Polymorphic tumor rejection antigen 1) (Tumor rejection antigen gp96)	Hsp90b1 Grp94 Tra-1 Tra1	ENPL_MOUSE	X	X	92476
Ectonucleoside triphosphate diphosphohydrolase 5 (NTPDase 5) (EC 3.6.1.6) (CD39 antigen-like 4) (ER-UDPase) (Guanosine-diphosphatase ENTPD5) (GDPase ENTPD5) (EC 3.6.1.42) (Nucleoside diphosphatase) (Uridine-diphosphatase ENTPD5) (UDPase ENTPD5)	Entpd5 Cd39l4	ENTP5_MOUSE	X	X	47102
Epithelial-stromal interaction protein 1	Epsti1	ESIP1_MOUSE	X	X	36098
Liver carboxylesterase 1 (EC 3.1.1.1) (Acyl-coenzyme A:cholesterol acyltransferase) (Carboxylesterase 1G) (ES-x)	Ces1 Ces1g	EST1_MOUSE	X	X	62680
Pyrethroid hydrolase Ces2a (EC 3.1.1.88) (carboxylesterase 2A)	Ces2a Ces6	EST2A_MOUSE	X	X	61940
Pyrethroid hydrolase Ces2e (EC 3.1.1.88) (carboxylesterase 2E)	Ces2e Ces5	EST2E_MOUSE	X	X	62318
Carboxylesterase 3A (EC 3.1.1.1) (ES-male) (Liver carboxylesterase 31) (Esterase-31)	Ces3a Es31	EST3A_MOUSE	X	X	63318
S-formylglutathione hydrolase (FGH) (EC 3.1.2.12) (Esterase 10) (Esterase D) (Sid 478)	Esd Es10 Sid478	ESTD_MOUSE	X	X	31320
Electron transfer flavoprotein subunit alpha, mitochondrial (Alpha-ETF)	Etfa	ETFA_MOUSE	X	X	35009
Electron transfer flavoprotein subunit beta (Beta-ETF)	Etfb	ETFB_MOUSE	X	X	27623
Electron transfer flavoprotein-ubiquinone oxidoreductase, mitochondrial (ETF-QO) (ETF-ubiquinone oxidoreductase) (EC 1.5.5.1) (Electron-transferring-flavoprotein dehydrogenase) (ETF dehydrogenase)	Etfdh	ETFD_MOUSE	X	X	68091
Persulfide dioxygenase ETHE1, mitochondrial (EC 1.13.11.18) (Ethylmalonic encephalopathy protein 1 homolog) (Hepatoma subtracted clone one protein) (Sulfur dioxygenase ETHE1)	Ethe1 Hsco	ETHE1_MOUSE	X	X	27739
Fructose-1,6-bisphosphatase 1 (FBPase 1) (EC 3.1.3.11) (D-fructose-1,6-bisphosphate 1-phosphohydrolase 1) (Fructose-1,6-bisphosphatase isozyme 3) (FBPase 3) (Liver FBPase)	Fbp1 Fbp Fbp3	F16P1_MOUSE	X	X	36912
Fumarylacetoacetase (FAA) (EC 3.7.1.2) (Beta-diketonase) (Fumarylacetoacetate hydrolase)	Fah	FAAA_MOUSE	X	X	46176
Fatty acid-binding protein, liver (14 kDa selenium-binding protein) (Fatty acid-binding protein 1) (Liver-type fatty acid-binding protein) (L-FABP)	Fabp1 Fabpl	FABPL_MOUSE	X	X	14246
Fatty acid synthase (EC 2.3.1.85) [Includes: [Acyl-carrier-protein] S-acetyltransferase (EC 2.3.1.38); [Acyl-carrier-protein] S-malonyltransferase (EC 2.3.1.39); 3-oxoacyl-[acyl-carrier-protein] synthase (EC 2.3.1.41); 3-oxoacyl-[acyl-carrier-protein] reductase (EC 1.1.1.100); 3-hydroxyacyl-[acyl-carrier-protein] dehydratase (EC 4.2.1.59); Enoyl-[acyl-carrier-protein] reductase (EC 1.3.1.39); Ole…	Fasn	FAS_MOUSE	X	X	272428
FGGY carbohydrate kinase domain-containing protein (EC 2.7.1.-)	Fggy	FGGY_MOUSE	X	X	60336
Fibrinogen alpha chain [Cleaved into: Fibrinopeptide A; Fibrinogen alpha chain]	Fga	FIBA_MOUSE	X	X	87429
Fibrinogen beta chain [Cleaved into: Fibrinopeptide B; Fibrinogen beta chain]	Fgb	FIBB_MOUSE	X	X	54753
Fibrinogen gamma chain	Fgg	FIBG_MOUSE	X	X	49391
Peptidyl-prolyl cis-trans isomerase FKBP4 (PPIase FKBP4) (EC 5.2.1.8) (52 kDa FK506-binding protein) (52 kDa FKBP) (FKBP-52) (59 kDa immunophilin) (p59) (FK506-binding protein 4) (FKBP-4) (FKBP59) (HSP-binding immunophilin) (HBI) (Immunophilin FKBP52) (Rotamase) [Cleaved into: Peptidyl-prolyl cis-trans isomerase FKBP4, N-terminally processed]	Fkbp4 Fkpb52	FKBP4_MOUSE	X	X	51572
Dimethylaniline monooxygenase [N-oxide-forming] 5 (EC 1.14.13.8) (Dimethylaniline oxidase 5) (Hepatic flavin-containing monooxygenase 5) (FMO 5)	Fmo5	FMO5_MOUSE	X	X	60001
Farnesyl pyrophosphate synthase (FPP synthase) (FPS) (EC 2.5.1.10) ((2E,6E)-farnesyl diphosphate synthase) (Cholesterol-regulated 39 kDa protein) (CR 39) (Dimethylallyltranstransferase) (EC 2.5.1.1) (Farnesyl diphosphate synthase) (Geranyltranstransferase)	Fdps	FPPS_MOUSE	X	X	40582
Ferritin light chain 1 (Ferritin L subunit 1)	Ftl1 Ftl Ftl-1	FRIL1_MOUSE	X	X	20802
Formimidoyltransferase-cyclodeaminase (Formiminotransferase-cyclodeaminase) (FTCD) [Includes: Glutamate formimidoyltransferase (EC 2.1.2.5) (Glutamate formiminotransferase) (Glutamate formyltransferase); Formimidoyltetrahydrofolate cyclodeaminase (EC 4.3.1.4) (Formiminotetrahydrofolate cyclodeaminase)]	Ftcd	FTCD_MOUSE	X	X	58939
Fumarate hydratase, mitochondrial (Fumarase) (EC 4.2.1.2) (EF-3)	Fh Fh1	FUMH_MOUSE	X	X	54357
Glyceraldehyde-3-phosphate dehydrogenase (GAPDH) (EC 1.2.1.12) (Peptidyl-cysteine S-nitrosylase GAPDH) (EC 2.6.99.-)	Gapdh Gapd	G3P_MOUSE	X	X	35810
GDH/6PGL endoplasmic bifunctional protein [Includes: Glucose 1-dehydrogenase (EC 1.1.1.47) (Hexose-6-phosphate dehydrogenase); 6-phosphogluconolactonase (6PGL) (EC 3.1.1.31)]	H6pd	G6PE_MOUSE	X	X	88928
Glucose-6-phosphate isomerase (GPI) (EC 5.3.1.9) (Autocrine motility factor) (AMF) (Neuroleukin) (NLK) (Phosphoglucose isomerase) (PGI) (Phosphohexose isomerase) (PHI)	Gpi Gpi1	G6PI_MOUSE	X	X	62767
4-aminobutyrate aminotransferase, mitochondrial (EC 2.6.1.19) ((S)-3-amino-2-methylpropionate transaminase) (EC 2.6.1.22) (GABA aminotransferase) (GABA-AT) (Gamma-amino-N-butyrate transaminase) (GABA transaminase) (GABA-T) (L-AIBAT)	Abat Gabat	GABT_MOUSE	X	X	56452
Galactokinase (EC 2.7.1.6) (Galactose kinase)	Galk1 Galk Glk	GALK1_MOUSE	X	X	42295
Aldose 1-epimerase (EC 5.1.3.3) (Galactose mutarotase)	Galm	GALM_MOUSE	X	X	37799
Neutral alpha-glucosidase AB (EC 3.2.1.84) (Alpha-glucosidase 2) (Glucosidase II subunit alpha)	Ganab G2an Kiaa0088	GANAB_MOUSE	X	X	106911
Glutaryl-CoA dehydrogenase, mitochondrial (GCD) (EC 1.3.8.6)	Gcdh	GCDH_MOUSE	X	X	48606
Glucokinase regulatory protein (Glucokinase regulator)	Gckr	GCKR_MOUSE	X	X	64679
eIF-2-alpha kinase activator GCN1	Gcn1 Gcn1l1	GCN1_MOUSE	X	X	293021
Rab GDP dissociation inhibitor alpha (Rab GDI alpha) (Guanosine diphosphate dissociation inhibitor 1) (GDI-1)	Gdi1 Rabgdia	GDIA_MOUSE	X	X	50522
Rab GDP dissociation inhibitor beta (Rab GDI beta) (GDI-3) (Guanosine diphosphate dissociation inhibitor 2) (GDI-2)	Gdi2 Gdi3	GDIB_MOUSE	X	X	50537
Rho GDP-dissociation inhibitor 1 (Rho GDI 1) (GDI-1) (Rho-GDI alpha)	Arhgdia C87222 Gdi1	GDIR1_MOUSE	X	X	23407
L-gulonolactone oxidase (LGO) (EC 1.1.3.8) (L-gulono-gamma-lactone oxidase) (GLO)	Gulo	GGLO_MOUSE	X	X	50478
Glycerate kinase (EC 2.7.1.31)	Glyctk	GLCTK_MOUSE	X	X	55293
1,4-alpha-glucan-branching enzyme (EC 2.4.1.18) (Brancher enzyme) (Glycogen-branching enzyme)	Gbe1	GLGB_MOUSE	X	X	80364
Glutamine synthetase (GS) (EC 6.3.1.2) (Glutamate decarboxylase) (EC 4.1.1.15) (Glutamate--ammonia ligase)	Glul Glns	GLNA_MOUSE	X	X	42120
Hydroxyacylglutathione hydrolase, mitochondrial (EC 3.1.2.6) (Glyoxalase II) (Glx II)	Hagh Glo2	GLO2_MOUSE	X	X	34084
Glycerol kinase (GK) (Glycerokinase) (EC 2.7.1.30) (ATP:glycerol 3-phosphotransferase)	Gk Gyk	GLPK_MOUSE	X	X	61227
Glutaminase liver isoform, mitochondrial (GLS) (EC 3.5.1.2) (L-glutaminase) (L-glutamine amidohydrolase)	Gls2 Kiaa4146	GLSL_MOUSE	X	X	66366
Glucosidase 2 subunit beta (80K-H protein) (Glucosidase II subunit beta) (Protein kinase C substrate 60.1 kDa protein heavy chain) (PKCSH)	Prkcsh	GLU2B_MOUSE	X	X	58793
Glycine N-acyltransferase (EC 2.3.1.13) (EC 2.3.1.71) (Acyl-CoA:glycine N-acyltransferase) (AAc) (Aralkyl acyl-CoA N-acyltransferase) (Aralkyl acyl-CoA:amino acid N-acyltransferase) (Benzoyl-coenzyme A:glycine N-acyltransferase) (Glycine N-benzoyltransferase)	Glyat	GLYAT_MOUSE	X	X	34098
Serine hydroxymethyltransferase, cytosolic (SHMT) (EC 2.1.2.1) (Glycine hydroxymethyltransferase) (Serine methylase)	Shmt1 Shmt	GLYC_MOUSE	X	X	52601
Glycine N-methyltransferase (EC 2.1.1.20)	Gnmt	GNMT_MOUSE	X	X	32675
Glycerol-3-phosphate dehydrogenase [NAD(+)], cytoplasmic (GPD-C) (GPDH-C) (EC 1.1.1.8)	Gpd1 Gdc-1 Gdc1 Kiaa4010	GPDA_MOUSE	X	X	37573
Glycerol-3-phosphate dehydrogenase, mitochondrial (GPD-M) (GPDH-M) (EC 1.1.5.3) (Protein TISP38)	Gpd2 Gdm1	GPDM_MOUSE	X	X	80954
Glutathione peroxidase 1 (GPx-1) (GSHPx-1) (EC 1.11.1.9) (Cellular glutathione peroxidase) (Selenium-dependent glutathione peroxidase 1)	Gpx1	GPX1_MOUSE	X	X	22329
Glyoxylate reductase/hydroxypyruvate reductase (EC 1.1.1.79) (EC 1.1.1.81)	Grhpr Glxr	GRHPR_MOUSE	X	X	35329
Stress-70 protein, mitochondrial (75 kDa glucose-regulated protein) (GRP-75) (Heat shock 70 kDa protein 9) (Mortalin) (Peptide-binding protein 74) (PBP74) (p66 MOT)	Hspa9 Grp75 Hsp74 Hspa9a	GRP75_MOUSE	X	X	73461
78 kDa glucose-regulated protein (GRP-78) (Heat shock 70 kDa protein 5) (Immunoglobulin heavy chain-binding protein) (BiP)	Hspa5 Grp78	GRP78_MOUSE	X	X	72422
Glutamate--cysteine ligase regulatory subunit (GCS light chain) (Gamma-ECS regulatory subunit) (Gamma-glutamylcysteine synthetase regulatory subunit) (Glutamate--cysteine ligase modifier subunit)	Gclm Glclr	GSH0_MOUSE	X	X	30535
Glutamate--cysteine ligase catalytic subunit (EC 6.3.2.2) (GCS heavy chain) (Gamma-ECS) (Gamma-glutamylcysteine synthetase)	Gclc Glclc	GSH1_MOUSE	X	X	72571
Glutathione S-transferase A3 (EC 2.5.1.18) (GST class-alpha member 3) (Glutathione S-transferase Ya3) (Glutathione S-transferase Yc)	Gsta3 Gstyc	GSTA3_MOUSE	X	X	25361
Glutathione S-transferase kappa 1 (EC 2.5.1.18) (GST 13-13) (GST class-kappa) (GSTK1-1) (mGSTK1) (Glutathione S-transferase subunit 13)	Gstk1	GSTK1_MOUSE	X	X	25704
Glutathione S-transferase Mu 1 (EC 2.5.1.18) (GST 1-1) (GST class-mu 1) (Glutathione S-transferase GT8.7) (pmGT10)	Gstm1	GSTM1_MOUSE	X	X	25970
Glutathione S-transferase Mu 2 (EC 2.5.1.18) (GST 5-5) (GST class-mu 2) (Glutathione S-transferase pmGT2)	Gstm2	GSTM2_MOUSE	X	X	25717
Glutathione S-transferase Mu-3	GSTM3	GSTM3_MOUSE	X	X	25702
Glutathione S-transferase Mu 7 (EC 2.5.1.18) (GST class-mu 7) (GSTM-7)	Gstm7	GSTM7_MOUSE	X	X	25710
Glutathione S-transferase P 1 (Gst P1) (EC 2.5.1.18) (GST YF-YF) (GST class-pi) (GST-piB) (Preadipocyte growth factor)	Gstp1 Gstpib	GSTP1_MOUSE	X	X	23609
Glutathione S-transferase P 2 (Gst P2) (EC 2.5.1.18) (GST YF-YF) (GST class-pi) (GST-piA)	Gstp2 Gstpia	GSTP2_MOUSE	X	X	23537
Glutathione S-transferase theta-1 (EC 2.5.1.18) (GST class-theta-1)	Gstt1	GSTT1_MOUSE	X	X	27374
Glutathione S-transferase theta-3	GSTT3	GSTT3_MOUSE	X	X	27403
Guanine deaminase (Guanase) (Guanine aminase) (EC 3.5.4.3) (Guanine aminohydrolase) (GAH)	Gda	GUAD_MOUSE	X	X	51013
Glycogen [starch] synthase, liver (EC 2.4.1.11)	Gys2	GYS2_MOUSE	X	X	80871
Histone H2B type 1-C/E/G	Hist1h2bc; Hist1h2be; Hist1h2bg	H2B1C_MOUSE	X	X	13906
2-hydroxyacyl-CoA lyase 1 (EC 4.1.-.-) (2-hydroxyphytanoyl-CoA lyase) (2-HPCL) (Phytanoyl-CoA 2-hydroxylase 2)	Hacl1 Hpcl Phyh2	HACL1_MOUSE	X	X	63660
Hydroxyacid oxidase 1 (HAOX1) (EC 1.1.3.15) (Glycolate oxidase) (GOX)	Hao1 Gox1 Hao-1	HAOX1_MOUSE	X	X	41001
Hemoglobin subunit alpha (Alpha-globin) (Hemoglobin alpha chain)	Hba Hba-a1	HBA_MOUSE	X	X	15085
Hemoglobin subunit beta-1 (Beta-1-globin) (Hemoglobin beta-1 chain) (Hemoglobin beta-major chain)	Hbb-b1	HBB1_MOUSE	X	X	15840
Hemoglobin subunit epsilon-Y2 (Epsilon-Y2-globin) (Hemoglobin epsilon-Y2 chain)	Hbb-y	HBE_MOUSE	X	X	16137
3-hydroxyacyl-CoA dehydrogenase type-2 (EC 1.1.1.35) (17-beta-hydroxysteroid dehydrogenase 10) (17-beta-HSD 10) (EC 1.1.1.51) (3-hydroxy-2-methylbutyryl-CoA dehydrogenase) (EC 1.1.1.178) (3-hydroxyacyl-CoA dehydrogenase type II) (Endoplasmic reticulum-associated amyloid beta-peptide-binding protein) (Mitochondrial ribonuclease P protein 2) (Mitochondrial RNase P protein 2) (Type II HADH)	Hsd17b10 Erab Hadh2	HCD2_MOUSE	X	X	27419
Hydroxyacyl-coenzyme A dehydrogenase, mitochondrial (HCDH) (EC 1.1.1.35) (Medium and short-chain L-3-hydroxyacyl-coenzyme A dehydrogenase) (Short-chain 3-hydroxyacyl-CoA dehydrogenase)	Hadh Hadhsc Mschad Schad	HCDH_MOUSE	X	X	34464
Heme-binding protein 1 (p22HBP)	Hebp1 Hbp	HEBP1_MOUSE	X	X	21067
Oxygen-dependent coproporphyrinogen-III oxidase, mitochondrial (COX) (Coprogen oxidase) (Coproporphyrinogenase) (EC 1.3.3.3)	Cpox Cpo	HEM6_MOUSE	X	X	49715
Homogentisate 1,2-dioxygenase (EC 1.13.11.5) (Homogentisate oxygenase) (Homogentisic acid oxidase) (Homogentisicase)	Hgd Aku Hgo	HGD_MOUSE	X	X	49960
3-hydroxyisobutyryl-CoA hydrolase, mitochondrial (EC 3.1.2.4) (3-hydroxyisobutyryl-coenzyme A hydrolase) (HIB-CoA hydrolase) (HIBYL-CoA-H)	Hibch	HIBCH_MOUSE	X	X	43038
Histidine triad nucleotide-binding protein 1 (EC 3.-.-.-) (Adenosine 5'-monophosphoramidase) (Protein kinase C inhibitor 1) (Protein kinase C-interacting protein 1) (PKCI-1)	Hint1 Hint Pkci Pkci1 Prkcnh1	HINT1_MOUSE	X	X	13777
5-hydroxyisourate hydrolase (HIU hydrolase) (HIUHase) (EC 3.5.2.17) (Transthyretin-related protein)	Urah	HIUH_MOUSE	X	X	13559
Hydroxymethylglutaryl-CoA synthase, cytoplasmic (HMG-CoA synthase) (EC 2.3.3.10) (3-hydroxy-3-methylglutaryl coenzyme A synthase)	Hmgcs1	HMCS1_MOUSE	X	X	57569
Hydroxymethylglutaryl-CoA synthase, mitochondrial (HMG-CoA synthase) (EC 2.3.3.10) (3-hydroxy-3-methylglutaryl coenzyme A synthase)	Hmgcs2	HMCS2_MOUSE	X	X	56823
Hydroxymethylglutaryl-CoA lyase, mitochondrial (HL) (HMG-CoA lyase) (EC 4.1.3.4) (3-hydroxy-3-methylglutarate-CoA lyase)	Hmgcl	HMGCL_MOUSE	X	X	34239
Heterogeneous nuclear ribonucleoprotein D0 (hnRNP D0) (AU-rich element RNA-binding protein 1)	Hnrnpd Auf1 Hnrpd	HNRPD_MOUSE	X	X	38354
Heterogeneous nuclear ribonucleoprotein F (hnRNP F) [Cleaved into: Heterogeneous nuclear ribonucleoprotein F, N-terminally processed]	Hnrnpf Hnrpf	HNRPF_MOUSE	X	X	45730
Heterogeneous nuclear ribonucleoprotein K (hnRNP K)	Hnrnpk Hnrpk	HNRPK_MOUSE	X	X	50976
Heterogeneous nuclear ribonucleoprotein L (hnRNP L)	Hnrnpl Hnrpl	HNRPL_MOUSE	X	X	63964
Heterogeneous nuclear ribonucleoprotein Q (hnRNP Q) (Glycine- and tyrosine-rich RNA-binding protein) (GRY-RBP) (NS1-associated protein 1) (Synaptotagmin-binding, cytoplasmic RNA-interacting protein) (pp68)	Syncrip Hnrpq Nsap1 Nsap1l	HNRPQ_MOUSE	X	X	69633
4-hydroxy-2-oxoglutarate aldolase, mitochondrial (EC 4.1.3.16) (Dihydrodipicolinate synthase-like) (DHDPS-like protein) (Probable 2-keto-4-hydroxyglutarate aldolase) (Probable KHG-aldolase)	Hoga1 Dhdpsl	HOGA1_MOUSE	X	X	34644
4-hydroxyphenylpyruvate dioxygenase (EC 1.13.11.27) (4-hydroxyphenylpyruvic acid oxidase) (4HPPD) (HPD) (HPPDase) (F Alloantigen) (F protein)	Hpd	HPPD_MOUSE	X	X	45054
Hypoxanthine-guanine phosphoribosyltransferase (HGPRT) (HGPRTase) (EC 2.4.2.8) (HPRT B)	Hprt1 Hprt	HPRT_MOUSE	X	X	24570
Heat shock protein HSP 90-alpha (Heat shock 86 kDa) (HSP 86) (HSP86) (Tumor-specific transplantation 86 kDa antigen) (TSTA)	Hsp90aa1 Hsp86 Hsp86-1 Hspca	HS90A_MOUSE	X	X	84788
Heat shock protein HSP 90-beta (Heat shock 84 kDa) (HSP 84) (HSP84) (Tumor-specific transplantation 84 kDa antigen) (TSTA)	Hsp90ab1 Hsp84 Hsp84-1 Hspcb	HS90B_MOUSE	X	X	83281
Heat shock-related 70 kDa protein 2 (Heat shock protein 70.2)	Hspa2 Hcp70.2 Hsp70-2	HSP72_MOUSE	X	X	69642
Heat shock 70 kDa protein 4 (Heat shock 70-related protein APG-2)	Hspa4 Apg2 Hsp110	HSP74_MOUSE	X	X	94133
Heat shock cognate 71 kDa protein (Heat shock 70 kDa protein 8)	Hspa8 Hsc70 Hsc73	HSP7C_MOUSE	X	X	70871
Histidine ammonia-lyase (Histidase) (EC 4.3.1.3)	Hal Hsd Huth	HUTH_MOUSE	X	X	72258
Probable imidazolonepropionase (EC 3.5.2.7) (Amidohydrolase domain-containing protein 1)	Amdhd1	HUTI_MOUSE	X	X	46489
Urocanate hydratase (Urocanase) (EC 4.2.1.49) (Imidazolonepropionate hydrolase)	Uroc1	HUTU_MOUSE	X	X	74590
Glucokinase (EC 2.7.1.2) (Hexokinase type IV) (HK IV) (Hexokinase-4) (HK4) (Hexokinase-D)	Gck Gk	HXK4_MOUSE	X	X	52089
Bifunctional epoxide hydrolase 2 [Includes: Cytosolic epoxide hydrolase 2 (CEH) (EC 3.3.2.10) (Epoxide hydratase) (Soluble epoxide hydrolase) (SEH); Lipid-phosphate phosphatase (EC 3.1.3.76)]	Ephx2 Eph2	HYES_MOUSE	X	X	62515
Hypoxia up-regulated protein 1 (GRP-170) (140 kDa Ca(2+)-binding protein) (CBP-140)	Hyou1 Grp170	HYOU1_MOUSE	X	X	111181
Isoamyl acetate-hydrolyzing esterase 1 homolog (EC 3.1.-.-)	Iah1	IAH1_MOUSE	X	X	27974
Isocitrate dehydrogenase [NADP] cytoplasmic (IDH) (EC 1.1.1.42) (Cytosolic NADP-isocitrate dehydrogenase) (IDP) (NADP(+)-specific ICDH) (Oxalosuccinate decarboxylase)	Idh1	IDHC_MOUSE	X	X	46674
Isocitrate dehydrogenase [NADP], mitochondrial (IDH) (EC 1.1.1.42) (ICD-M) (IDP) (NADP(+)-specific ICDH) (Oxalosuccinate decarboxylase)	Idh2	IDHP_MOUSE	X	X	50906
Eukaryotic translation initiation factor 2 subunit 1 (Eukaryotic translation initiation factor 2 subunit alpha) (eIF-2-alpha) (eIF-2A) (eIF-2alpha)	Eif2s1 Eif2a	IF2A_MOUSE	X	X	36108
Eukaryotic initiation factor 4A-I (eIF-4A-I) (eIF4A-I) (EC 3.6.4.13) (ATP-dependent RNA helicase eIF4A-1)	Eif4a1 Ddx2a Eif4a	IF4A1_MOUSE	X	X	46154
Eukaryotic initiation factor 4A-II (eIF-4A-II) (eIF4A-II) (EC 3.6.4.13) (ATP-dependent RNA helicase eIF4A-2) [Cleaved into: Eukaryotic initiation factor 4A-II, N-terminally processed]	Eif4a2 Ddx2b	IF4A2_MOUSE	X	X	46402
Eukaryotic translation initiation factor 5A-1 (eIF-5A-1) (eIF-5A1) (Eukaryotic initiation factor 5A isoform 1) (eIF-5A) (eIF-4D)	Eif5a	IF5A1_MOUSE	X	X	16832
Importin subunit beta-1 (Karyopherin subunit beta-1) (Nuclear factor p97) (Pore targeting complex 97 kDa subunit) (PTAC97) (SCG)	Kpnb1 Impnb	IMB1_MOUSE	X	X	97184
Indolethylamine N-methyltransferase (Indolamine N-methyltransferase) (EC 2.1.1.49) (EC 2.1.1.96) (Aromatic alkylamine N-methyltransferase) (Amine N-methyltransferase) (Arylamine N-methyltransferase) (Thioether S-methyltransferase) (TEMT)	Inmt Temt	INMT_MOUSE	X	X	29460
Inorganic pyrophosphatase (EC 3.6.1.1) (Pyrophosphate phospho-hydrolase) (PPase)	Ppa1 Pp Pyp	IPYR_MOUSE	X	X	32667
Isochorismatase domain-containing protein 2A, mitochondrial	Isoc2a Isoc2	ISC2A_MOUSE	X	X	22417
Keratin, type I cytoskeletal 10 (56 kDa cytokeratin) (Cytokeratin-10) (CK-10) (Keratin, type I cytoskeletal 59 kDa) (Keratin-10) (K10)	Krt10 Krt1-10	K1C10_MOUSE	X	X	57770
Keratin, type I cytoskeletal 14 (Cytokeratin-14) (CK-14) (Keratin-14) (K14)	Krt14 Krt1-14	K1C14_MOUSE	X	X	52867
Keratin, type I cytoskeletal 18 (Cytokeratin endo B) (Keratin D) (Cytokeratin-18) (CK-18) (Keratin-18) (K18)	Krt18 Kerd Krt1-18	K1C18_MOUSE	X	X	47538
Keratin, type I cytoskeletal 19 (Cytokeratin-19) (CK-19) (Keratin-19) (K19)	Krt19 Krt1-19	K1C19_MOUSE	X	X	44542
Keratin, type II cytoskeletal 2 oral (Keratin-76) (K76) (Type-II keratin Kb9)	Krt76	K22O_MOUSE	X	X	62845
Keratin, type II cytoskeletal 1 (67 kDa cytokeratin) (Cytokeratin-1) (CK-1) (Keratin-1) (K1) (Type-II keratin Kb1)	Krt1 Krt2-1	K2C1_MOUSE	X	X	65606
Keratin, type II cytoskeletal 1b (Cytokeratin-1B) (CK-1B) (Embryonic type II keratin-1) (Keratin-77) (K77) (Type-II keratin Kb39)	Krt77 Krt1b	K2C1B_MOUSE	X	X	61359
Keratin, type II cytoskeletal 5 (Cytokeratin-5) (CK-5) (Keratin-5) (K5) (Type-II keratin Kb5)	Krt5 Krt2-5	K2C5_MOUSE	X	X	61767
Keratin, type II cytoskeletal 6A (Cytokeratin-6A) (CK-6A) (Keratin-6-alpha) (mK6-alpha) (Keratin-6A) (K6A)	Krt6a Ker2 Krt2-6 Krt2-6a Krt6	K2C6A_MOUSE	X	X	59335
Keratin, type II cytoskeletal 75 (Cytokeratin-75) (CK-75) (Keratin-6 hair follicle) (mK6hf) (Keratin-75) (K75) (Type II keratin-K6hf) (Type-II keratin Kb18)	Krt75 Kb18	K2C75_MOUSE	X	X	59741
Keratin, type II cytoskeletal 8 (Cytokeratin endo A) (Cytokeratin-8) (CK-8) (Keratin-8) (K8) (Type-II keratin Kb8)	Krt8 Krt2-8	K2C8_MOUSE	X	X	54565
GTP:AMP phosphotransferase AK3, mitochondrial (EC 2.7.4.10) (Adenylate kinase 3) (AK 3) (Adenylate kinase 3 alpha-like 1)	Ak3 Ak3l Ak3l1 Akl3l	KAD3_MOUSE	X	X	25426
Kynurenine--oxoglutarate transaminase 3 (EC 2.6.1.7) (Cysteine-S-conjugate beta-lyase 2) (EC 4.4.1.13) (Kynurenine aminotransferase III) (KATIII) (Kynurenine--glyoxylate transaminase) (EC 2.6.1.63) (Kynurenine--oxoglutarate transaminase III)	Ccbl2 Kat3	KAT3_MOUSE	X	X	51126
Ketohexokinase (EC 2.7.1.3) (Hepatic fructokinase)	Khk	KHK_MOUSE	X	X	32750
Histone-lysine N-methyltransferase 2D (Lysine N-methyltransferase 2D) (EC 2.1.1.43) (ALL1-related protein) (Myeloid/lymphoid or mixed-lineage leukemia protein 2)	Kmt2d Mll2 Mll4	KMT2D_MOUSE	X	X	600245
Pyruvate kinase PKM (EC 2.7.1.40) (Pyruvate kinase muscle isozyme)	Pkm Pk3 Pkm2 Pykm	KPYM_MOUSE	X	X	57845
Pyruvate kinase PKLR (EC 2.7.1.40) (L-PK) (Pyruvate kinase isozymes L/R)	Pklr	KPYR_MOUSE	X	X	62309
Kynureninase (EC 3.7.1.3) (L-kynurenine hydrolase)	Kynu	KYNU_MOUSE	X	X	52325
LIM and SH3 domain protein 1 (LASP-1) (Metastatic lymph node gene 50 protein) (MLN 50)	Lasp1 Mln50	LASP1_MOUSE	X	X	29994
Lipid droplet-associated hydrolase (EC 3.1.1.-) (Lipid droplet-associated serine hydrolase) (mLDAH)	Ldah	LDAH_MOUSE	X	X	37374
L-lactate dehydrogenase A chain (LDH-A) (EC 1.1.1.27) (LDH muscle subunit) (LDH-M)	Ldha Ldh-1 Ldh1	LDHA_MOUSE	X	X	36499
Probable D-lactate dehydrogenase, mitochondrial (DLD) (Lactate dehydrogenase D) (EC 1.1.2.4)	Ldhd	LDHD_MOUSE	X	X	51848
Galectin-9 (Gal-9)	Lgals9	LEG9_MOUSE	X	X	40036
Legumain (EC 3.4.22.34) (Asparaginyl endopeptidase) (Protease, cysteine 1)	Lgmn Prsc1	LGMN_MOUSE	X	X	49373
Lactoylglutathione lyase (EC 4.4.1.5) (Aldoketomutase) (Glyoxalase I) (Glx I) (Ketone-aldehyde mutase) (Methylglyoxalase) (S-D-lactoylglutathione methylglyoxal lyase)	Glo1	LGUL_MOUSE	X	X	20810
Lysosomal acid lipase/cholesteryl ester hydrolase (Acid cholesteryl ester hydrolase) (LAL) (EC 3.1.1.13) (Cholesteryl esterase) (Lipase A) (Sterol esterase)	Lipa Lip1	LICH_MOUSE	X	X	45325
Leukotriene A-4 hydrolase (LTA-4 hydrolase) (EC 3.3.2.6) (Leukotriene A(4) hydrolase)	Lta4h	LKHA4_MOUSE	X	X	69051
Lon protease homolog, mitochondrial (EC 3.4.21.-) (Lon protease-like protein) (LONP) (Mitochondrial ATP-dependent protease Lon) (Serine protease 15)	Lonp1 Prss15	LONM_MOUSE	X	X	105843
Leucine-rich PPR motif-containing protein, mitochondrial (130 kDa leucine-rich protein) (LRP 130) (mLRP130)	Lrpprc Lrp130	LPPRC_MOUSE	X	X	156615
Leucine-rich repeat-containing protein 47	Lrrc47 Kiaa1185	LRC47_MOUSE	X	X	63590
Lumican (Keratan sulfate proteoglycan lumican) (KSPG lumican)	Lum Lcn Ldc	LUM_MOUSE	X	X	38265
Acyl-protein thioesterase 1 (APT-1) (EC 3.1.2.-) (Lysophospholipase 1) (Lysophospholipase I) (LPL-I) (LysoPLA I)	Lypla1 Apt1 Pla1a	LYPA1_MOUSE	X	X	24688
Dimethylglycine dehydrogenase, mitochondrial (EC 1.5.8.4) (ME2GLYDH)	Dmgdh	M2GD_MOUSE	X	X	97255
Maleylacetoacetate isomerase (MAAI) (EC 5.2.1.2) (GSTZ1-1) (Glutathione S-transferase zeta 1) (EC 2.5.1.18)	Gstz1 Maai	MAAI_MOUSE	X	X	24275
NADP-dependent malic enzyme (NADP-ME) (EC 1.1.1.40) (Malic enzyme 1)	Me1 Mod-1 Mod1	MAOX_MOUSE	X	X	63954
Mitochondrial amidoxime-reducing component 1 (mARC1) (EC 1.-.-.-) (Molybdenum cofactor sulfurase C-terminal domain-containing protein 1) (MOSC domain-containing protein 1) (Moco sulfurase C-terminal domain-containing protein 1)	Marc1 Mosc1	MARC1_MOUSE	X	X	37979
Methylcrotonoyl-CoA carboxylase subunit alpha, mitochondrial (MCCase subunit alpha) (EC 6.4.1.4) (3-methylcrotonyl-CoA carboxylase 1) (3-methylcrotonyl-CoA carboxylase biotin-containing subunit) (3-methylcrotonyl-CoA:carbon dioxide ligase subunit alpha)	Mccc1 Mcca	MCCA_MOUSE	X	X	79344
Methylcrotonoyl-CoA carboxylase beta chain, mitochondrial (MCCase subunit beta) (EC 6.4.1.4) (3-methylcrotonyl-CoA carboxylase 2) (3-methylcrotonyl-CoA carboxylase non-biotin-containing subunit) (3-methylcrotonyl-CoA:carbon dioxide ligase subunit beta)	Mccc2	MCCB_MOUSE	X	X	61379
Malate dehydrogenase, cytoplasmic (EC 1.1.1.37) (Cytosolic malate dehydrogenase)	Mdh1 Mor2	MDHC_MOUSE	X	X	36511
Malate dehydrogenase, mitochondrial (EC 1.1.1.37)	Mdh2 Mor1	MDHM_MOUSE	X	X	35611
S-adenosylmethionine synthase isoform type-1 (AdoMet synthase 1) (EC 2.5.1.6) (Methionine adenosyltransferase 1) (MAT 1)	Mat1a	METK1_MOUSE	X	X	43509
S-adenosylmethionine synthase isoform type-2 (AdoMet synthase 2) (EC 2.5.1.6) (Methionine adenosyltransferase 2) (MAT 2)	Mat2a	METK2_MOUSE	X	X	43689
Microsomal glutathione S-transferase 1 (Microsomal GST-1) (EC 2.5.1.18) (Microsomal GST-I)	Mgst1	MGST1_MOUSE	X	X	17552
Macrophage migration inhibitory factor (MIF) (EC 5.3.2.1) (Delayed early response protein 6) (DER6) (Glycosylation-inhibiting factor) (GIF) (L-dopachrome isomerase) (L-dopachrome tautomerase) (EC 5.3.3.12) (Phenylpyruvate tautomerase)	Mif	MIF_MOUSE	X	X	12504
Methylmalonate-semialdehyde dehydrogenase [acylating], mitochondrial (MMSDH) (Malonate-semialdehyde dehydrogenase [acylating]) (EC 1.2.1.18) (EC 1.2.1.27) (Aldehyde dehydrogenase family 6 member A1)	Aldh6a1	MMSA_MOUSE	X	X	57916
Moesin (Membrane-organizing extension spike protein)	Msn	MOES_MOUSE	X	X	67767
Phosphate carrier protein, mitochondrial (Phosphate transport protein) (PTP) (Solute carrier family 25 member 3)	Slc25a3	MPCP_MOUSE	X	X	39632
Mitochondrial peptide methionine sulfoxide reductase (EC 1.8.4.11) (Peptide-methionine (S)-S-oxide reductase) (Peptide Met(O) reductase) (Protein-methionine-S-oxide reductase) (PMSR)	Msra	MSRA_MOUSE	X	X	25988
Microsomal triglyceride transfer protein large subunit	Mttp Mtp	MTP_MOUSE	X	X	99099
Murinoglobulin-1 (MuG1)	Mug1 Mug-1	MUG1_MOUSE	X	X	165298
Methylmalonyl-CoA mutase, mitochondrial (MCM) (EC 5.4.99.2) (Methylmalonyl-CoA isomerase)	Mut	MUTA_MOUSE	X	X	82844
Major vault protein (MVP)	Mvp	MVP_MOUSE	X	X	95924
Myosin-9 (Cellular myosin heavy chain, type A) (Myosin heavy chain 9) (Myosin heavy chain, non-muscle IIa) (Non-muscle myosin heavy chain A) (NMMHC-A) (Non-muscle myosin heavy chain IIa) (NMMHC II-a) (NMMHC-IIA)	Myh9	MYH9_MOUSE	X	X	226372
Nicotinate-nucleotide pyrophosphorylase [carboxylating] (EC 2.4.2.19) (Quinolinate phosphoribosyltransferase [decarboxylating]) (QAPRTase) (QPRTase)	Qprt	NADC_MOUSE	X	X	31530
NAD kinase 2, mitochondrial (EC 2.7.1.23) (Mitochondrial NAD kinase) (NAD kinase domain-containing protein 1, mitochondrial)	Nadk2 Mnadk Nadkd1	NAKD2_MOUSE	X	X	50859
NADH-cytochrome b5 reductase 3 (B5R) (Cytochrome b5 reductase) (EC 1.6.2.2) (Diaphorase-1) [Cleaved into: NADH-cytochrome b5 reductase 3 membrane-bound form; NADH-cytochrome b5 reductase 3 soluble form]	Cyb5r3 Dia1	NB5R3_MOUSE	X	X	34128
NADPH--cytochrome P450 reductase (CPR) (P450R) (EC 1.6.2.4)	Por	NCPR_MOUSE	X	X	77044
Nucleoside diphosphate kinase B (NDK B) (NDP kinase B) (EC 2.7.4.6) (Histidine protein kinase NDKB) (EC 2.7.13.3) (P18) (nm23-M2)	Nme2	NDKB_MOUSE	X	X	17363
Protein NDRG2 (N-myc downstream-regulated gene 2 protein) (Protein Ndr2)	Ndrg2 Kiaa1248 Ndr2	NDRG2_MOUSE	X	X	40789
Cytochrome c oxidase subunit NDUFA4	Ndufa4	NDUA4_MOUSE	X	X	9327
NADH dehydrogenase [ubiquinone] 1 alpha subcomplex subunit 9, mitochondrial (Complex I-39kD) (CI-39kD) (NADH-ubiquinone oxidoreductase 39 kDa subunit)	Ndufa9	NDUA9_MOUSE	X	X	42525
NADH dehydrogenase [ubiquinone] 1 alpha subcomplex subunit 10, mitochondrial (Complex I-42kD) (CI-42kD) (NADH-ubiquinone oxidoreductase 42 kDa subunit)	Ndufa10	NDUAA_MOUSE	X	X	40603
NADH-ubiquinone oxidoreductase 75 kDa subunit, mitochondrial (EC 1.6.5.3) (EC 1.6.99.3) (Complex I-75kD) (CI-75kD)	Ndufs1	NDUS1_MOUSE	X	X	79777
NADH dehydrogenase [ubiquinone] iron-sulfur protein 2, mitochondrial (EC 1.6.5.3) (EC 1.6.99.3) (Complex I-49kD) (CI-49kD) (NADH-ubiquinone oxidoreductase 49 kDa subunit)	Ndufs2	NDUS2_MOUSE	X	X	52626
NADH dehydrogenase [ubiquinone] iron-sulfur protein 3, mitochondrial (EC 1.6.5.3) (EC 1.6.99.3) (Complex I-30kD) (CI-30kD) (NADH-ubiquinone oxidoreductase 30 kDa subunit)	Ndufs3	NDUS3_MOUSE	X	X	30149
NADH dehydrogenase [ubiquinone] flavoprotein 1, mitochondrial (EC 1.6.5.3) (EC 1.6.99.3) (Complex I-51kD) (CI-51kD) (NADH-ubiquinone oxidoreductase 51 kDa subunit)	Ndufv1	NDUV1_MOUSE	X	X	50834
Protein NipSnap homolog 1 (NipSnap1)	Nipsnap1	NIPS1_MOUSE	X	X	33363
Nitrilase homolog 1 (EC 3.5.-.-)	Nit1	NIT1_MOUSE	X	X	35705
Omega-amidase NIT2 (EC 3.5.1.3) (Nitrilase homolog 2)	Nit2 D16Ertd502e	NIT2_MOUSE	X	X	30502
Non-specific lipid-transfer protein (NSL-TP) (EC 2.3.1.176) (Propanoyl-CoA C-acyltransferase) (SCP-chi) (SCPX) (Sterol carrier protein 2) (SCP-2) (Sterol carrier protein X) (SCP-X)	Scp2 Scp-2	NLTP_MOUSE	X	X	59126
Nodal modulator 1	Nomo1	NOMO1_MOUSE	X	X	133420
Nucleophosmin (NPM) (Nucleolar phosphoprotein B23) (Nucleolar protein NO38) (Numatrin)	Npm1	NPM_MOUSE	X	X	32560
Ribosyldihydronicotinamide dehydrogenase [quinone] (EC 1.10.5.1) (NRH dehydrogenase [quinone] 2) (NRH:quinone oxidoreductase 2) (Quinone reductase 2) (QR2)	Nqo2 Nmor2	NQO2_MOUSE	X	X	26248
Peroxisomal coenzyme A diphosphatase NUDT7 (EC 3.6.1.-) (Nucleoside diphosphate-linked moiety X motif 7) (Nudix motif 7)	Nudt7	NUDT7_MOUSE	X	X	26857
Ornithine aminotransferase, mitochondrial (EC 2.6.1.13) (Ornithine--oxo-acid aminotransferase)	Oat	OAT_MOUSE	X	X	48355
Peroxisomal carnitine O-octanoyltransferase (COT) (EC 2.3.1.137)	Crot Cot	OCTC_MOUSE	X	X	70264
Lipoamide acyltransferase component of branched-chain alpha-keto acid dehydrogenase complex, mitochondrial (EC 2.3.1.168) (Branched-chain alpha-keto acid dehydrogenase complex component E2) (BCKAD-E2) (BCKADE2) (Dihydrolipoamide acetyltransferase component of branched-chain alpha-keto acid dehydrogenase complex) (Dihydrolipoamide branched chain transacylase) (Dihydrolipoyllysine-residue (2-methyl…	Dbt	ODB2_MOUSE	X	X	53247
2-oxoisovalerate dehydrogenase subunit alpha, mitochondrial (EC 1.2.4.4) (Branched-chain alpha-keto acid dehydrogenase E1 component alpha chain) (BCKDE1A) (BCKDH E1-alpha)	Bckdha	ODBA_MOUSE	X	X	50371
2-oxoisovalerate dehydrogenase subunit beta, mitochondrial (EC 1.2.4.4) (Branched-chain alpha-keto acid dehydrogenase E1 component beta chain) (BCKDE1B) (BCKDH E1-beta)	Bckdhb	ODBB_MOUSE	X	X	42880
2-oxoglutarate dehydrogenase, mitochondrial (EC 1.2.4.2) (2-oxoglutarate dehydrogenase complex component E1) (OGDC-E1) (Alpha-ketoglutarate dehydrogenase)	Ogdh Kiaa4192	ODO1_MOUSE	X	X	116449
Dihydrolipoyllysine-residue succinyltransferase component of 2-oxoglutarate dehydrogenase complex, mitochondrial (EC 2.3.1.61) (2-oxoglutarate dehydrogenase complex component E2) (OGDC-E2) (Dihydrolipoamide succinyltransferase component of 2-oxoglutarate dehydrogenase complex) (E2K)	Dlst	ODO2_MOUSE	X	X	48995
Dihydrolipoyllysine-residue acetyltransferase component of pyruvate dehydrogenase complex, mitochondrial (EC 2.3.1.12) (Dihydrolipoamide acetyltransferase component of pyruvate dehydrogenase complex) (Pyruvate dehydrogenase complex component E2) (PDC-E2) (PDCE2)	Dlat	ODP2_MOUSE	X	X	67942
Pyruvate dehydrogenase E1 component subunit alpha, somatic form, mitochondrial (EC 1.2.4.1) (PDHE1-A type I)	Pdha1 Pdha-1	ODPA_MOUSE	X	X	43232
Pyruvate dehydrogenase E1 component subunit beta, mitochondrial (PDHE1-B) (EC 1.2.4.1)	Pdhb	ODPB_MOUSE	X	X	38937
Pyruvate dehydrogenase protein X component, mitochondrial (Dihydrolipoamide dehydrogenase-binding protein of pyruvate dehydrogenase complex) (Lipoyl-containing pyruvate dehydrogenase complex component X)	Pdhx	ODPX_MOUSE	X	X	53999
5-oxoprolinase (EC 3.5.2.9) (5-oxo-L-prolinase) (5-OPase) (Pyroglutamase)	Oplah	OPLA_MOUSE	X	X	137611
Mitochondrial ornithine transporter 1 (Solute carrier family 25 member 15)	Slc25a15 Ornt1	ORNT1_MOUSE	X	X	32823
Dolichyl-diphosphooligosaccharide--protein glycosyltransferase 48 kDa subunit (DDOST 48 kDa subunit) (Oligosaccharyl transferase 48 kDa subunit) (EC 2.4.99.18)	Ddost	OST48_MOUSE	X	X	49028
Ornithine carbamoyltransferase, mitochondrial (EC 2.1.3.3) (Ornithine transcarbamylase) (OTCase)	Otc	OTC_MOUSE	X	X	39765
Ubiquitin thioesterase OTUB1 (EC 3.4.19.12) (Deubiquitinating enzyme OTUB1) (OTU domain-containing ubiquitin aldehyde-binding protein 1) (Otubain-1) (Ubiquitin-specific-processing protease OTUB1)	Otub1	OTUB1_MOUSE	X	X	31270
Proliferation-associated protein 2G4 (IRES-specific cellular trans-acting factor 45 kDa) (ITAF45) (Mpp1) (Proliferation-associated protein 1) (Protein p38-2G4)	Pa2g4 Ebp1 Plfap	PA2G4_MOUSE	X	X	43699
Polyadenylate-binding protein 1 (PABP-1) (Poly(A)-binding protein 1)	Pabpc1 Pabp1	PABP1_MOUSE	X	X	70671
Partitioning defective 3 homolog (PAR-3) (PARD-3) (Atypical PKC isotype-specific-interacting protein) (ASIP) (Ephrin-interacting protein) (PHIP)	Pard3 Par3	PARD3_MOUSE	X	X	149075
Protein deglycase DJ-1 (EC 3.1.2.-) (EC 3.5.1.-) (Parkinson disease protein 7 homolog)	Park7	PARK7_MOUSE	X	X	20021
Phenazine biosynthesis-like domain-containing protein 1 (EC 5.1.-.-)	Pbld1 Mawbp2 Pbld	PBLD1_MOUSE	X	X	32048
Phenazine biosynthesis-like domain-containing protein 2 (EC 5.1.-.-)	Pbld2 Mawbp1	PBLD2_MOUSE	X	X	31983
Poly(rC)-binding protein 1 (Alpha-CP1) (Heterogeneous nuclear ribonucleoprotein E1) (hnRNP E1)	Pcbp1	PCBP1_MOUSE	X	X	37498
Propionyl-CoA carboxylase alpha chain, mitochondrial (PCCase subunit alpha) (EC 6.4.1.3) (Propanoyl-CoA:carbon dioxide ligase subunit alpha)	Pcca	PCCA_MOUSE	X	X	79922
Propionyl-CoA carboxylase beta chain, mitochondrial (PCCase subunit beta) (EC 6.4.1.3) (Propanoyl-CoA:carbon dioxide ligase subunit beta)	Pccb	PCCB_MOUSE	X	X	58409
Phosphoenolpyruvate carboxykinase, cytosolic [GTP] (PEPCK-C) (EC 4.1.1.32)	Pck1 Pepck	PCKGC_MOUSE	X	X	69355
Protein piccolo (Aczonin) (Brain-derived HLMN protein) (Multidomain presynaptic cytomatrix protein)	Pclo Acz	PCLO_MOUSE	X	X	550834
PCTP-like protein (PCTP-L) (START domain-containing protein 10) (StARD10) (Serologically defined colon cancer antigen 28 homolog) (StAR-related lipid transfer protein 10)	Stard10 Pctpl Sdccag28 Sdccagg28	PCTL_MOUSE	X	X	32951
Ethanolamine-phosphate cytidylyltransferase (EC 2.7.7.14) (CTP:phosphoethanolamine cytidylyltransferase) (Phosphorylethanolamine transferase)	Pcyt2	PCY2_MOUSE	X	X	45235
Protein disulfide-isomerase (PDI) (EC 5.3.4.1) (Cellular thyroid hormone-binding protein) (Endoplasmic reticulum resident protein 59) (ER protein 59) (ERp59) (Prolyl 4-hydroxylase subunit beta) (p55)	P4hb Pdia1	PDIA1_MOUSE	X	X	57058
Protein disulfide-isomerase A3 (EC 5.3.4.1) (58 kDa glucose-regulated protein) (58 kDa microsomal protein) (p58) (Disulfide isomerase ER-60) (Endoplasmic reticulum resident protein 57) (ER protein 57) (ERp57) (Endoplasmic reticulum resident protein 60) (ER protein 60) (ERp60)	Pdia3 Erp Erp60 Grp58	PDIA3_MOUSE	X	X	56678
Protein disulfide-isomerase A4 (EC 5.3.4.1) (Endoplasmic reticulum resident protein 72) (ER protein 72) (ERp-72) (ERp72)	Pdia4 Cai Erp72	PDIA4_MOUSE	X	X	71982
Protein disulfide-isomerase A6 (EC 5.3.4.1) (Thioredoxin domain-containing protein 7)	Pdia6 Txndc7	PDIA6_MOUSE	X	X	48100
Phosphatidylethanolamine-binding protein 1 (PEBP-1) (HCNPpp) [Cleaved into: Hippocampal cholinergic neurostimulating peptide (HCNP)]	Pebp1 Pbp Pebp	PEBP1_MOUSE	X	X	20830
Peroxisomal trans-2-enoyl-CoA reductase (TERP) (EC 1.3.1.38)	Pecr	PECR_MOUSE	X	X	32410
Phosphoglycerate kinase 1 (EC 2.7.2.3)	Pgk1 Pgk-1	PGK1_MOUSE	X	X	44550
Phosphoglucomutase-1 (PGM 1) (EC 5.4.2.2) (Glucose phosphomutase 1) (Phosphoglucomutase-2)	Pgm1 Pgm2	PGM1_MOUSE	X	X	61418
Phosphoglucomutase-like protein 5	Pgm5	PGM5_MOUSE	X	X	62220
Membrane-associated progesterone receptor component 1	Pgrmc1 Pgrmc	PGRC1_MOUSE	X	X	21694
Phenylalanine-4-hydroxylase (PAH) (EC 1.14.16.1) (Phe-4-monooxygenase)	Pah	PH4H_MOUSE	X	X	51900
Prohibitin (B-cell receptor-associated protein 32) (BAP 32)	Phb	PHB_MOUSE	X	X	29820
Prohibitin-2 (B-cell receptor-associated protein BAP37) (Repressor of estrogen receptor activity)	Phb2 Bap Bcap37 Rea	PHB2_MOUSE	X	X	33296
Plastin-3 (T-plastin)	Pls3	PLST_MOUSE	X	X	70742
Purine nucleoside phosphorylase (PNP) (EC 2.4.2.1) (Inosine phosphorylase) (Inosine-guanosine phosphorylase)	Pnp Np Pnp1	PNPH_MOUSE	X	X	32277
Pyridoxine-5'-phosphate oxidase (EC 1.4.3.5) (Pyridoxamine-phosphate oxidase)	Pnpo	PNPO_MOUSE	X	X	30114
Serum paraoxonase/arylesterase 1 (PON 1) (EC 3.1.1.2) (EC 3.1.1.81) (EC 3.1.8.1) (Aromatic esterase 1) (A-esterase 1) (Serum aryldialkylphosphatase 1)	Pon1 Pon	PON1_MOUSE	X	X	39565
Peptidyl-prolyl cis-trans isomerase A (PPIase A) (EC 5.2.1.8) (Cyclophilin A) (Cyclosporin A-binding protein) (Rotamase A) (SP18) [Cleaved into: Peptidyl-prolyl cis-trans isomerase A, N-terminally processed]	Ppia	PPIA_MOUSE	X	X	17971
Palmitoyl-protein thioesterase 1 (PPT-1) (EC 3.1.2.22) (Palmitoyl-protein hydrolase 1)	Ppt1 Ppt	PPT1_MOUSE	X	X	34490
Peroxiredoxin-1 (EC 1.11.1.15) (Macrophage 23 kDa stress protein) (Osteoblast-specific factor 3) (OSF-3) (Thioredoxin peroxidase 2) (Thioredoxin-dependent peroxide reductase 2)	Prdx1 Msp23 Paga Tdpx2	PRDX1_MOUSE	X	X	22176
Peroxiredoxin-2 (EC 1.11.1.15) (Thiol-specific antioxidant protein) (TSA) (Thioredoxin peroxidase 1) (Thioredoxin-dependent peroxide reductase 1)	Prdx2 Tdpx1 Tpx	PRDX2_MOUSE	X	X	21779
Thioredoxin-dependent peroxide reductase, mitochondrial (EC 1.11.1.15) (Antioxidant protein 1) (AOP-1) (PRX III) (Perioredoxin-3) (Protein MER5)	Prdx3 Aop1 Mer5	PRDX3_MOUSE	X	X	28127
Peroxiredoxin-5, mitochondrial (EC 1.11.1.15) (Antioxidant enzyme B166) (AOEB166) (Liver tissue 2D-page spot 2D-0014IV) (PLP) (Peroxiredoxin V) (Prx-V) (Peroxisomal antioxidant enzyme) (Thioredoxin peroxidase PMP20) (Thioredoxin reductase)	Prdx5 Prdx6	PRDX5_MOUSE	X	X	21897
Peroxiredoxin-6 (EC 1.11.1.15) (1-Cys peroxiredoxin) (1-Cys PRX) (Acidic calcium-independent phospholipase A2) (aiPLA2) (EC 3.1.1.-) (Antioxidant protein 2) (Non-selenium glutathione peroxidase) (NSGPx) (EC 1.11.1.9)	Prdx6 Aop2 Ltw4 Prdx5	PRDX6_MOUSE	X	X	24871
Profilin-1 (Profilin I)	Pfn1	PROF1_MOUSE	X	X	14957
26S protease regulatory subunit 4 (P26s4) (26S proteasome AAA-ATPase subunit RPT2) (Proteasome 26S subunit ATPase 1)	Psmc1	PRS4_MOUSE	X	X	49185
26S protease regulatory subunit 6A (26S proteasome AAA-ATPase subunit RPT5) (Proteasome 26S subunit ATPase 3) (Tat-binding protein 1) (TBP-1)	Psmc3 Tbp1	PRS6A_MOUSE	X	X	49549
26S protease regulatory subunit 7 (26S proteasome AAA-ATPase subunit RPT1) (Proteasome 26S subunit ATPase 2) (Protein MSS1)	Psmc2 Mss1	PRS7_MOUSE	X	X	48648
Proteasome subunit alpha type-1 (EC 3.4.25.1) (Macropain subunit C2) (Multicatalytic endopeptidase complex subunit C2) (Proteasome component C2) (Proteasome nu chain)	Psma1	PSA1_MOUSE	X	X	29547
Proteasome subunit alpha type-2 (EC 3.4.25.1) (Macropain subunit C3) (Multicatalytic endopeptidase complex subunit C3) (Proteasome component C3)	Psma2 Lmpc3	PSA2_MOUSE	X	X	25927
Proteasome subunit alpha type-4 (EC 3.4.25.1) (Macropain subunit C9) (Multicatalytic endopeptidase complex subunit C9) (Proteasome component C9) (Proteasome subunit L)	Psma4	PSA4_MOUSE	X	X	29471
Proteasome subunit alpha type-6 (EC 3.4.25.1) (Macropain iota chain) (Multicatalytic endopeptidase complex iota chain) (Proteasome iota chain)	Psma6	PSA6_MOUSE	X	X	27372
Proteasome subunit alpha type-7 (EC 3.4.25.1) (Proteasome subunit RC6-1)	Psma7	PSA7_MOUSE	X	X	27855
Proteasome subunit beta type-2 (EC 3.4.25.1) (Macropain subunit C7-I) (Multicatalytic endopeptidase complex subunit C7-I) (Proteasome component C7-I)	Psmb2	PSB2_MOUSE	X	X	22906
Proteasome subunit beta type-3 (EC 3.4.25.1) (Proteasome chain 13) (Proteasome component C10-II) (Proteasome theta chain)	Psmb3	PSB3_MOUSE	X	X	22965
Proteasome subunit beta type-5 (EC 3.4.25.1) (Macropain epsilon chain) (Multicatalytic endopeptidase complex epsilon chain) (Proteasome chain 6) (Proteasome epsilon chain) (Proteasome subunit X)	Psmb5	PSB5_MOUSE	X	X	28532
Proteasome subunit beta type-6 (EC 3.4.25.1) (Low molecular mass protein 19) (Macropain delta chain) (Multicatalytic endopeptidase complex delta chain) (Proteasome delta chain) (Proteasome subunit Y)	Psmb6 Lmp19	PSB6_MOUSE	X	X	25379
Proteasome subunit beta type-8 (EC 3.4.25.1) (Low molecular mass protein 7) (Macropain subunit C13) (Multicatalytic endopeptidase complex subunit C13) (Proteasome component C13) (Proteasome subunit beta-5i)	Psmb8 Lmp7 Mc13	PSB8_MOUSE	X	X	30260
26S proteasome non-ATPase regulatory subunit 11 (26S proteasome regulatory subunit RPN6) (26S proteasome regulatory subunit S9) (26S proteasome regulatory subunit p44.5)	Psmd11	PSD11_MOUSE	X	X	47437
26S proteasome non-ATPase regulatory subunit 12 (26S proteasome regulatory subunit RPN5) (26S proteasome regulatory subunit p55)	Psmd12	PSD12_MOUSE	X	X	52895
26S proteasome non-ATPase regulatory subunit 2 (26S proteasome regulatory subunit RPN1) (26S proteasome regulatory subunit S2) (26S proteasome subunit p97)	Psmd2	PSMD2_MOUSE	X	X	100203
26S proteasome non-ATPase regulatory subunit 3 (26S proteasome regulatory subunit RPN3) (26S proteasome regulatory subunit S3) (Proteasome subunit p58) (Transplantation antigen P91A) (Tum-P91A antigen)	Psmd3 P91a Tstap91a	PSMD3_MOUSE	X	X	60718
Proteasome activator complex subunit 2 (11S regulator complex subunit beta) (REG-beta) (Activator of multicatalytic protease subunit 2) (Proteasome activator 28 subunit beta) (PA28b) (PA28beta)	Psme2 Pa28b1	PSME2_MOUSE	X	X	27057
Polypyrimidine tract-binding protein 1 (PTB) (Heterogeneous nuclear ribonucleoprotein I) (hnRNP I)	Ptbp1 Ptb	PTBP1_MOUSE	X	X	56478
Phosphotriesterase-related protein (EC 3.1.-.-) (Parathion hydrolase-related protein)	Pter	PTER_MOUSE	X	X	39218
Multifunctional protein ADE2 [Includes: Phosphoribosylaminoimidazole-succinocarboxamide synthase (EC 6.3.2.6) (SAICAR synthetase); Phosphoribosylaminoimidazole carboxylase (EC 4.1.1.21) (AIR carboxylase) (AIRC)]	Paics	PUR6_MOUSE	X	X	47006
Bifunctional purine biosynthesis protein PURH [Includes: Phosphoribosylaminoimidazolecarboxamide formyltransferase (EC 2.1.2.3) (5-aminoimidazole-4-carboxamide ribonucleotide formyltransferase) (AICAR transformylase); IMP cyclohydrolase (EC 3.5.4.10) (ATIC) (IMP synthase) (Inosinicase)]	Atic Purh	PUR9_MOUSE	X	X	64217
Adenylosuccinate synthetase isozyme 1 (AMPSase 1) (AdSS 1) (EC 6.3.4.4) (Adenylosuccinate synthetase, basic isozyme) (Adenylosuccinate synthetase, muscle isozyme) (M-type adenylosuccinate synthetase) (IMP--aspartate ligase 1)	Adssl1 Adss1	PURA1_MOUSE	X	X	50254
Pyruvate carboxylase, mitochondrial (EC 6.4.1.1) (Pyruvic carboxylase) (PCB)	Pc Pcx	PYC_MOUSE	X	X	129685
Glycogen phosphorylase, liver form (EC 2.4.1.1)	Pygl	PYGL_MOUSE	X	X	97463
CAD protein [Includes: Glutamine-dependent carbamoyl-phosphate synthase (EC 6.3.5.5); Aspartate carbamoyltransferase (EC 2.1.3.2); Dihydroorotase (EC 3.5.2.3)]	Cad	PYR1_MOUSE	X	X	243238
Pregnancy zone protein OS=Mus musculus GN=Pzp PE=1 SV=3	0	PZP_MOUSE	X	X	0
Cytochrome b-c1 complex subunit 1, mitochondrial (Complex III subunit 1) (Core protein I) (Ubiquinol-cytochrome-c reductase complex core protein 1)	Uqcrc1	QCR1_MOUSE	X	X	52852
Cytochrome b-c1 complex subunit 2, mitochondrial (Complex III subunit 2) (Core protein II) (Ubiquinol-cytochrome-c reductase complex core protein 2)	Uqcrc2	QCR2_MOUSE	X	X	48235
Quinone oxidoreductase (EC 1.6.5.5) (NADPH:quinone reductase) (Zeta-crystallin)	Cryz	QOR_MOUSE	X	X	35269
Ras-related protein Rab-15	Rab15	RAB15_MOUSE	X	X	24318
Ras-related protein Rab-1A (YPT1-related protein)	Rab1A Rab1	RAB1A_MOUSE	X	X	22678
Ras-related protein Rab-1B	Rab1b	RAB1B_MOUSE	X	X	22187
Receptor of activated protein C kinase 1 (12-3) (Guanine nucleotide-binding protein subunit beta-2-like 1) (Receptor for activated C kinase) (Receptor of activated protein kinase C 1) (p205) [Cleaved into: Receptor of activated protein C kinase 1, N-terminally processed (Guanine nucleotide-binding protein subunit beta-2-like 1, N-terminally processed)]	Rack1 Gnb2-rs1, Gnb2l1	RACK1_MOUSE	X	X	35077
GTP-binding nuclear protein Ran (GTPase Ran) (Ras-like protein TC4) (Ras-related nuclear protein)	Ran Rasl2-8	RAN_MOUSE	X	X	24423
Ras-related protein Rab-11A (Rab-11)	Rab11a Rab11	RB11A_MOUSE	X	X	24394
Retinol dehydrogenase 7 (EC 1.1.1.105) (Cis-retinol/3alpha-hydroxysterol short-chain dehydrogenase isozyme 2) (Cis-retinol/androgen dehydrogenase type 2) (CRAD-2)	Rdh7 Crad2	RDH7_MOUSE	X	X	35660
Regucalcin (RC) (Gluconolactonase) (GNL) (EC 3.1.1.17) (Senescence marker protein 30) (SMP-30)	Rgn Smp30	RGN_MOUSE	X	X	33407
Ribonuclease inhibitor (Ribonuclease/angiogenin inhibitor 1)	Rnh1 Rnh	RINI_MOUSE	X	X	49816
60S ribosomal protein L10a (CSA-19) (Neural precursor cell expressed developmentally down-regulated protein 6) (NEDD-6)	Rpl10a Nedd-6 Nedd6	RL10A_MOUSE	X	X	24916
60S ribosomal protein L11	Rpl11	RL11_MOUSE	X	X	20252
60S ribosomal protein L12	Rpl12	RL12_MOUSE	X	X	17805
60S ribosomal protein L13 (A52)	Rpl13	RL13_MOUSE	X	X	24305
60S ribosomal protein L13a (Transplantation antigen P198) (Tum-P198 antigen)	Rpl13a P198 Tstap198-7	RL13A_MOUSE	X	X	23464
60S ribosomal protein L15	Rpl15	RL15_MOUSE	X	X	24146
60S ribosomal protein L17	Rpl17	RL17_MOUSE	X	X	21423
60S ribosomal protein L18	Rpl18	RL18_MOUSE	X	X	21645
60S ribosomal protein L18a	Rpl18a	RL18A_MOUSE	X	X	20732
60S ribosomal protein L23a	Rpl23a	RL23A_MOUSE	X	X	17695
60S ribosomal protein L27	Rpl27	RL27_MOUSE	X	X	15798
60S ribosomal protein L30	Rpl30	RL30_MOUSE	X	X	12784
60S ribosomal protein L35a	Rpl35a	RL35A_MOUSE	X	X	12554
60S ribosomal protein L4	Rpl4	RL4_MOUSE	X	X	47154
60S ribosomal protein L8	Rpl8	RL8_MOUSE	X	X	28025
60S ribosomal protein L9	Rpl9	RL9_MOUSE	X	X	21881
60S acidic ribosomal protein P0 (60S ribosomal protein L10E)	Rplp0 Arbp	RLA0_MOUSE	X	X	34216
Heterogeneous nuclear ribonucleoprotein A3 (hnRNP A3)	Hnrnpa3 Hnrpa3	ROA3_MOUSE	X	X	39652
Heterogeneous nuclear ribonucleoprotein A/B (hnRNP A/B) (CArG-binding factor-A) (CBF-A)	Hnrnpab Cbf-a Cgbfa Hnrpab	ROAA_MOUSE	X	X	30831
Dolichyl-diphosphooligosaccharide--protein glycosyltransferase subunit 1 (EC 2.4.99.18) (Dolichyl-diphosphooligosaccharide--protein glycosyltransferase 67 kDa subunit) (Ribophorin I) (RPN-I) (Ribophorin-1)	Rpn1	RPN1_MOUSE	X	X	68528
40S ribosomal protein S12	Rps12	RS12_MOUSE	X	X	14525
40S ribosomal protein S13	Rps13	RS13_MOUSE	X	X	17222
40S ribosomal protein S14	Rps14	RS14_MOUSE	X	X	16273
40S ribosomal protein S16	Rps16	RS16_MOUSE	X	X	16445
40S ribosomal protein S18 (Ke-3) (Ke3)	Rps18	RS18_MOUSE	X	X	17719
40S ribosomal protein S2 (40S ribosomal protein S4) (Protein LLRep3)	Rps2 Llrep3 Rps4	RS2_MOUSE	X	X	31231
40S ribosomal protein S20	Rps20	RS20_MOUSE	X	X	13373
40S ribosomal protein S25	Rps25	RS25_MOUSE	X	X	13742
40S ribosomal protein S26	Rps26	RS26_MOUSE	X	X	13015
40S ribosomal protein S27	Rps27	RS27_MOUSE	X	X	9461
Ubiquitin-40S ribosomal protein S27a (Ubiquitin carboxyl extension protein 80) [Cleaved into: Ubiquitin; 40S ribosomal protein S27a]	Rps27a Uba80 Ubcep1	RS27A_MOUSE	X	X	17951
40S ribosomal protein S3 (EC 4.2.99.18)	Rps3	RS3_MOUSE	X	X	26674
40S ribosomal protein S3a (Protein TU-11)	Rps3a Rps3a1	RS3A_MOUSE	X	X	29885
40S ribosomal protein S4, X isoform	Rps4x Rps4	RS4X_MOUSE	X	X	29598
40S ribosomal protein S5 [Cleaved into: 40S ribosomal protein S5, N-terminally processed]	Rps5	RS5_MOUSE	X	X	22889
40S ribosomal protein S7	Rps7	RS7_MOUSE	X	X	22127
40S ribosomal protein S8	Rps8	RS8_MOUSE	X	X	24205
40S ribosomal protein SA (37 kDa laminin receptor precursor) (37LRP) (37 kDa oncofetal antigen) (37/67 kDa laminin receptor) (LRP/LR) (67 kDa laminin receptor) (67LR) (Laminin receptor 1) (LamR) (Laminin-binding protein precursor p40) (LBP/p40) (OFA/iLRP)	Rpsa Lamr1 P40-8	RSSA_MOUSE	X	X	32838
Rotatin	Rttn	RTTN_MOUSE	X	X	248489
SEC14-like protein 2 (Alpha-tocopherol-associated protein) (TAP)	Sec14l2	S14L2_MOUSE	X	X	46300
SEC14-like protein 4	Sec14l4	S14L4_MOUSE	X	X	46053
Adenosylhomocysteinase (AdoHcyase) (EC 3.3.1.1) (CUBP) (Liver copper-binding protein) (S-adenosyl-L-homocysteine hydrolase)	Ahcy	SAHH_MOUSE	X	X	47688
Sarcosine dehydrogenase, mitochondrial (SarDH) (EC 1.5.8.3)	Sardh	SARDH_MOUSE	X	X	101682
Selenium-binding protein 1 (56 kDa selenium-binding protein) (SBP56) (SP56)	Selenbp1 Lpsb	SBP1_MOUSE	X	X	52514
Selenium-binding protein 2 (56 kDa acetaminophen-binding protein) (AP56)	Selenbp2 Lpsb2	SBP2_MOUSE	X	X	52610
Protein transport protein Sec23A (SEC23-related protein A)	Sec23a Sec23 Sec23r	SC23A_MOUSE	X	X	86162
Protein transport protein Sec31A (SEC31-like protein 1) (SEC31-related protein A)	Sec31a Sec31l1	SC31A_MOUSE	X	X	133569
Secernin-3	Scrn3	SCRN3_MOUSE	X	X	47661
Succinate dehydrogenase [ubiquinone] flavoprotein subunit, mitochondrial (EC 1.3.5.1) (Flavoprotein subunit of complex II) (Fp)	Sdha	SDHA_MOUSE	X	X	72585
Succinate dehydrogenase [ubiquinone] iron-sulfur subunit, mitochondrial (EC 1.3.5.1) (Iron-sulfur subunit of complex II) (Ip)	Sdhb	SDHB_MOUSE	X	X	31814
L-serine dehydratase/L-threonine deaminase (SDH) (EC 4.3.1.17) (L-serine deaminase) (L-threonine dehydratase) (TDH) (EC 4.3.1.19)	Sds	SDHL_MOUSE	X	X	34593
Protein sidekick-1	Sdk1	SDK1_MOUSE	X	X	240306
Septin-14	42261	SEP14_MOUSE	X	X	49811
Superkiller viralicidic activity 2-like 2 (EC 3.6.4.13) (ATP-dependent helicase SKIV2L2) (TRAMP-like complex helicase)	Skiv2l2	SK2L2_MOUSE	X	X	117636
Serine/threonine-protein kinase SMG1 (SMG-1) (EC 2.7.11.1)	Smg1 Kiaa0421	SMG1_MOUSE	X	X	409769
Staphylococcal nuclease domain-containing protein 1 (100 kDa coactivator) (p100 co-activator)	Snd1	SND1_MOUSE	X	X	102088
Superoxide dismutase [Mn], mitochondrial (EC 1.15.1.1)	Sod2 Sod-2	SODM_MOUSE	X	X	24603
Peroxisomal sarcosine oxidase (PSO) (EC 1.5.3.1) (EC 1.5.3.7) (L-pipecolate oxidase) (L-pipecolic acid oxidase)	Pipox Pso	SOX_MOUSE	X	X	43847
Serine protease inhibitor A3F (Serpin A3F)	Serpina3f	SPA3F_MOUSE	X	X	50003
Serine protease inhibitor A3K (Serpin A3K) (Contrapsin) (SPI-2)	Serpina3k Mcm2 Spi2	SPA3K_MOUSE	X	X	46880
Serpin B6 (Placental thrombin inhibitor) (Proteinase inhibitor 6) (PI-6)	Serpinb6 Serpinb6a Spi3	SPB6_MOUSE	X	X	42599
Agmatinase, mitochondrial (EC 3.5.3.11) (Agmatine ureohydrolase) (AUH)	Agmat	SPEB_MOUSE	X	X	38255
Sepiapterin reductase (SPR) (EC 1.1.1.153)	Spr	SPRE_MOUSE	X	X	27883
Selenide, water dikinase 2 (EC 2.7.9.3) (Selenium donor protein 2) (Selenophosphate synthase 2)	Sephs2 Sps2	SPS2_MOUSE	X	X	47834
Serine--pyruvate aminotransferase, mitochondrial (SPT) (EC 2.6.1.51) (Alanine--glyoxylate aminotransferase) (AGT) (EC 2.6.1.44)	Agxt Agxt1	SPYA_MOUSE	X	X	45912
Translocon-associated protein subunit delta (TRAP-delta) (Signal sequence receptor subunit delta) (SSR-delta)	Ssr4	SSRD_MOUSE	X	X	18937
Sulfotransferase 1A1 (ST1A1) (EC 2.8.2.1) (Aryl sulfotransferase) (Phenol sulfotransferase) (Phenol/aryl sulfotransferase) (mSTp1) (ST1A4) (Sulfokinase)	Sult1a1 St1a1 Stp Stp1	ST1A1_MOUSE	X	X	33974
Sulfotransferase 1 family member D1 (ST1D1) (EC 2.8.2.-) (Amine N-sulfotransferase) (SULT-N) (Dopamine sulfotransferase Sult1d1) (Tyrosine-ester sulfotransferase)	Sult1d1 St1d1	ST1D1_MOUSE	X	X	35083
Stress-induced-phosphoprotein 1 (STI1) (mSTI1) (Hsc70/Hsp90-organizing protein) (Hop)	Stip1	STIP1_MOUSE	X	X	62582
Succinyl-CoA ligase [ADP/GDP-forming] subunit alpha, mitochondrial (EC 6.2.1.4) (EC 6.2.1.5) (Succinyl-CoA synthetase subunit alpha) (SCS-alpha)	Suclg1	SUCA_MOUSE	X	X	36155
Succinyl-CoA ligase [ADP-forming] subunit beta, mitochondrial (EC 6.2.1.5) (ATP-specific succinyl-CoA synthetase subunit beta) (Succinyl-CoA synthetase beta-A chain) (SCS-betaA)	Sucla2	SUCB1_MOUSE	X	X	50114
Succinyl-CoA ligase [GDP-forming] subunit beta, mitochondrial (EC 6.2.1.4) (GTP-specific succinyl-CoA synthetase subunit beta) (Succinyl-CoA synthetase beta-G chain) (SCS-betaG)	Suclg2	SUCB2_MOUSE	X	X	46840
Sulfite oxidase, mitochondrial (EC 1.8.3.1)	Suox	SUOX_MOUSE	X	X	60756
Alanine--tRNA ligase, cytoplasmic (EC 6.1.1.7) (Alanyl-tRNA synthetase) (AlaRS)	Aars	SYAC_MOUSE	X	X	106909
Aspartate--tRNA ligase, cytoplasmic (EC 6.1.1.12) (Aspartyl-tRNA synthetase) (AspRS)	Dars	SYDC_MOUSE	X	X	57147
Bifunctional glutamate/proline--tRNA ligase (Bifunctional aminoacyl-tRNA synthetase) [Includes: Glutamate--tRNA ligase (EC 6.1.1.17) (Glutamyl-tRNA synthetase) (GluRS); Proline--tRNA ligase (EC 6.1.1.15) (Prolyl-tRNA synthetase) (ProRS)]	Eprs Qprs	SYEP_MOUSE	X	X	170079
Phenylalanine--tRNA ligase beta subunit (EC 6.1.1.20) (Phenylalanyl-tRNA synthetase beta subunit) (PheRS)	Farsb Farsl Farslb Frsb	SYFB_MOUSE	X	X	65697
Glycine--tRNA ligase (EC 6.1.1.14) (Diadenosine tetraphosphate synthetase) (AP-4-A synthetase) (Glycyl-tRNA synthetase) (GlyRS)	Gars	SYG_MOUSE	X	X	81878
Lysine--tRNA ligase (EC 6.1.1.6) (Lysyl-tRNA synthetase) (LysRS)	Kars	SYK_MOUSE	X	X	67840
Asparagine--tRNA ligase, cytoplasmic (EC 6.1.1.22) (Asparaginyl-tRNA synthetase) (AsnRS)	Nars	SYNC_MOUSE	X	X	64279
Serine--tRNA ligase, cytoplasmic (EC 6.1.1.11) (Seryl-tRNA synthetase) (SerRS) (Seryl-tRNA(Ser/Sec) synthetase)	Sars Sars1 Sers	SYSC_MOUSE	X	X	58389
Threonine--tRNA ligase, cytoplasmic (EC 6.1.1.3) (Threonyl-tRNA synthetase) (ThrRS)	Tars	SYTC_MOUSE	X	X	83356
Valine--tRNA ligase (EC 6.1.1.9) (Protein G7a) (Valyl-tRNA synthetase) (ValRS)	Vars Bat6 G7a Vars2	SYVC_MOUSE	X	X	140215
Transaldolase (EC 2.2.1.2)	Taldo1 Tal Taldo	TALDO_MOUSE	X	X	37387
Tubulin alpha-1C chain (Alpha-tubulin 6) (Alpha-tubulin isotype M-alpha-6) (Tubulin alpha-6 chain)	Tuba1c Tuba6	TBA1C_MOUSE	X	X	49909
Tubulin alpha-3 chain (Alpha-tubulin 3/7) (Alpha-tubulin isotype M-alpha-3/7) (Tubulin alpha-3/alpha-7 chain)	Tuba3a Tuba3; Tuba3b Tuba7	TBA3_MOUSE	X	X	49960
Tubulin alpha-4A chain (Alpha-tubulin 4) (Alpha-tubulin isotype M-alpha-4) (Tubulin alpha-4 chain)	Tuba4a Tuba4	TBA4A_MOUSE	X	X	49924
Tubulin beta-2A chain	Tubb2a Tubb2	TBB2A_MOUSE	X	X	49907
Tubulin beta-4B chain (Tubulin beta-2C chain)	Tubb4b Tubb2c	TBB4B_MOUSE	X	X	49831
T-complex protein 1 subunit alpha (TCP-1-alpha) (CCT-alpha) (Tailless complex polypeptide 1A) (TCP-1-A) (Tailless complex polypeptide 1B) (TCP-1-B)	Tcp1 Cct1 Ccta	TCPA_MOUSE	X	X	60449
T-complex protein 1 subunit beta (TCP-1-beta) (CCT-beta)	Cct2 Cctb	TCPB_MOUSE	X	X	57477
T-complex protein 1 subunit delta (TCP-1-delta) (A45) (CCT-delta)	Cct4 Cctd	TCPD_MOUSE	X	X	58066
T-complex protein 1 subunit epsilon (TCP-1-epsilon) (CCT-epsilon)	Cct5 Ccte Kiaa0098	TCPE_MOUSE	X	X	59624
T-complex protein 1 subunit gamma (TCP-1-gamma) (CCT-gamma) (Matricin) (mTRiC-P5)	Cct3 Cctg	TCPG_MOUSE	X	X	60630
T-complex protein 1 subunit eta (TCP-1-eta) (CCT-eta)	Cct7 Ccth	TCPH_MOUSE	X	X	59652
T-complex protein 1 subunit theta (TCP-1-theta) (CCT-theta)	Cct8 Cctq	TCPQ_MOUSE	X	X	59555
Transitional endoplasmic reticulum ATPase (TER ATPase) (EC 3.6.4.6) (15S Mg(2+)-ATPase p97 subunit) (Valosin-containing protein) (VCP)	Vcp	TERA_MOUSE	X	X	89322
Protein-glutamine gamma-glutamyltransferase 2 (EC 2.3.2.13) (Tissue transglutaminase) (Transglutaminase C) (TG(C)) (TGC) (TGase C) (Transglutaminase-2) (TGase-2)	Tgm2	TGM2_MOUSE	X	X	77061
Acetyl-CoA acetyltransferase, cytosolic (EC 2.3.1.9) (Cytosolic acetoacetyl-CoA thiolase)	Acat2	THIC_MOUSE	X	X	41298
3-ketoacyl-CoA thiolase A, peroxisomal (EC 2.3.1.16) (Acetyl-CoA acyltransferase A) (Beta-ketothiolase A) (Peroxisomal 3-oxoacyl-CoA thiolase A)	Acaa1a Acaa1	THIKA_MOUSE	X	X	43953
3-ketoacyl-CoA thiolase B, peroxisomal (EC 2.3.1.16) (Acetyl-CoA acyltransferase B) (Beta-ketothiolase B) (Peroxisomal 3-oxoacyl-CoA thiolase B)	Acaa1b Acaa1	THIKB_MOUSE	X	X	43995
Acetyl-CoA acetyltransferase, mitochondrial (EC 2.3.1.9) (Acetoacetyl-CoA thiolase)	Acat1	THIL_MOUSE	X	X	44816
3-ketoacyl-CoA thiolase, mitochondrial (EC 2.3.1.16) (Acetyl-CoA acyltransferase) (Beta-ketothiolase) (Mitochondrial 3-oxoacyl-CoA thiolase)	Acaa2	THIM_MOUSE	X	X	41830
Thioredoxin (Trx) (ATL-derived factor) (ADF)	Txn Txn1	THIO_MOUSE	X	X	11675
Thiosulfate sulfurtransferase (EC 2.8.1.1) (Rhodanese)	Tst	THTR_MOUSE	X	X	33466
Triokinase/FMN cyclase (Bifunctional ATP-dependent dihydroxyacetone kinase/FAD-AMP lyase (cyclizing)) [Includes: ATP-dependent dihydroxyacetone kinase (DHA kinase) (EC 2.7.1.28) (EC 2.7.1.29) (Glycerone kinase) (Triokinase) (Triose kinase); FAD-AMP lyase (cyclizing) (EC 4.6.1.15) (FAD-AMP lyase (cyclic FMN forming)) (FMN cyclase)]	Tkfc Dak	TKFC_MOUSE	X	X	59691
Transketolase (TK) (EC 2.2.1.1) (P68)	Tkt	TKT_MOUSE	X	X	67630
Talin-1	Tln1 Tln	TLN1_MOUSE	X	X	269821
Triosephosphate isomerase (TIM) (EC 5.3.1.1) (Triose-phosphate isomerase)	Tpi1 Tpi	TPIS_MOUSE	X	X	32192
Thiopurine S-methyltransferase (EC 2.1.1.67) (Thiopurine methyltransferase)	Tpmt	TPMT_MOUSE	X	X	27586
Tripeptidyl-peptidase 2 (TPP-2) (EC 3.4.14.10) (Tripeptidyl aminopeptidase) (Tripeptidyl-peptidase II) (TPP-II)	Tpp2	TPP2_MOUSE	X	X	139879
Heat shock protein 75 kDa, mitochondrial (HSP 75) (TNFR-associated protein 1) (Tumor necrosis factor type 1 receptor-associated protein) (TRAP-1)	Trap1 Hsp75	TRAP1_MOUSE	X	X	80209
Tetratricopeptide repeat protein 38 (TPR repeat protein 38)	Ttc38	TTC38_MOUSE	X	X	52224
Alpha-tocopherol transfer protein (Alpha-TTP)	Ttpa	TTPA_MOUSE	X	X	32014
Thioredoxin domain-containing protein 5 (Endoplasmic reticulum resident protein 46) (ER protein 46) (ERp46) (Plasma cell-specific thioredoxin-related protein) (PC-TRP) (Thioredoxin-like protein p46)	Txndc5 Tlp46	TXND5_MOUSE	X	X	46415
Thioredoxin-like protein 1 (32 kDa thioredoxin-related protein)	Txnl1 Trp32 Txnl	TXNL1_MOUSE	X	X	32237
Ubiquitin-like modifier-activating enzyme 1 (Ubiquitin-activating enzyme E1) (Ubiquitin-activating enzyme E1 X) (Ubiquitin-like modifier-activating enzyme 1 X)	Uba1 Sbx Ube1 Ube1ax Ube1x	UBA1_MOUSE	X	X	117809
Ubiquitin carboxyl-terminal hydrolase 14 (EC 3.4.19.12) (Deubiquitinating enzyme 14) (Ubiquitin thioesterase 14) (Ubiquitin-specific-processing protease 14)	Usp14	UBP14_MOUSE	X	X	56002
Ubiquitin carboxyl-terminal hydrolase 5 (EC 3.4.19.12) (Deubiquitinating enzyme 5) (Isopeptidase T) (Ubiquitin thioesterase 5) (Ubiquitin-specific-processing protease 5)	Usp5 Isot	UBP5_MOUSE	X	X	95833
E3 ubiquitin-protein ligase UBR4 (EC 6.3.2.-) (N-recognin-4) (Zinc finger UBR1-type protein 1) (p600)	Ubr4 Kiaa0462 Zubr1	UBR4_MOUSE	X	X	572290
Cytochrome b-c1 complex subunit Rieske, mitochondrial (EC 1.10.2.2) (Complex III subunit 5) (Cytochrome b-c1 complex subunit 5) (Rieske iron-sulfur protein) (RISP) (Ubiquinol-cytochrome c reductase iron-sulfur subunit) [Cleaved into: Cytochrome b-c1 complex subunit 11 (Complex III subunit IX) (Ubiquinol-cytochrome c reductase 8 kDa protein)]	Uqcrfs1	UCRI_MOUSE	X	X	29368
UDP-glucuronosyltransferase 1-7C (UDPGT 1-7C) (UGT1*7C) (UGT1-07C) (UGT1.7C) (EC 2.4.1.17) (UDP-glucuronosyltransferase 1A7C) (UGT1A10)	Ugt1a7c Ugt1a10	UD17C_MOUSE	X	X	59758
UDP-glucuronosyltransferase 2A3 (UDPGT 2A3) (EC 2.4.1.17)	Ugt2a3	UD2A3_MOUSE	X	X	61119
UDP-glucuronosyltransferase 2B17 (EC 2.4.1.17) (M-1) (UDP-glucuronosyltransferase 2B5) (UDPGT 2B5)	Ugt2b17 Ugt2b5	UDB17_MOUSE	X	X	60856
UDP-glucose 6-dehydrogenase (UDP-Glc dehydrogenase) (UDP-GlcDH) (UDPGDH) (EC 1.1.1.22)	Ugdh	UGDH_MOUSE	X	X	54832
UDP-glucose:glycoprotein glucosyltransferase 1 (UGT1) (EC 2.4.1.-) (UDP--Glc:glycoprotein glucosyltransferase) (UDP-glucose ceramide glucosyltransferase-like 1)	Uggt1 Gt Ugcgl1 Uggt Ugt1 Ugtr	UGGG1_MOUSE	X	X	176434
UTP--glucose-1-phosphate uridylyltransferase (EC 2.7.7.9) (UDP-glucose pyrophosphorylase) (UDPGP) (UGPase)	Ugp2	UGPA_MOUSE	X	X	56979
Uricase (EC 1.7.3.3) (Urate oxidase)	Uox	URIC_MOUSE	X	X	35039
Guanine nucleotide exchange factor VAV3 (VAV-3)	Vav3	VAV3_MOUSE	X	X	97968
Voltage-dependent anion-selective channel protein 1 (VDAC-1) (mVDAC1) (Outer mitochondrial membrane protein porin 1) (Plasmalemmal porin) (Voltage-dependent anion-selective channel protein 5) (VDAC-5) (mVDAC5)	Vdac1 Vdac5	VDAC1_MOUSE	X	X	32351
Vigilin (High density lipoprotein-binding protein) (HDL-binding protein)	Hdlbp	VIGLN_MOUSE	X	X	141743
Vinculin (Metavinculin)	Vcl	VINC_MOUSE	X	X	116717
von Willebrand factor A domain-containing protein 5A (Loss of heterozygosity 11 chromosomal region 2 gene A protein homolog)	Vwa5a Loh11cr2a	VMA5A_MOUSE	X	X	87143
Vacuolar protein sorting-associated protein 35 (Maternal-embryonic 3) (Vesicle protein sorting 35)	Vps35 Mem3	VPS35_MOUSE	X	X	91713
Nuclease-sensitive element-binding protein 1 (CCAAT-binding transcription factor I subunit A) (CBF-A) (DNA-binding protein B) (DBPB) (Enhancer factor I subunit A) (EFI-A) (Y-box transcription factor) (Y-box-binding protein 1) (YB-1)	Ybx1 Msy-1 Msy1 Nsep1 Yb1	YBOX1_MOUSE	X	X	35730
Serine/threonine-protein phosphatase 2A 65 kDa regulatory subunit A alpha isoform (PP2A subunit A isoform PR65-alpha) (PP2A subunit A isoform R1-alpha)	Ppp2r1a	2AAA_MOUSE	X		65323
Kynurenine/alpha-aminoadipate aminotransferase, mitochondrial (KAT/AadAT) (2-aminoadipate aminotransferase) (2-aminoadipate transaminase) (EC 2.6.1.39) (Alpha-aminoadipate aminotransferase) (AadAT) (Kynurenine aminotransferase II) (Kynurenine--oxoglutarate aminotransferase II) (Kynurenine--oxoglutarate transaminase 2) (EC 2.6.1.7) (Kynurenine--oxoglutarate transaminase II)	Aadat Kat2	AADAT_MOUSE	X		47598
ATP-binding cassette sub-family A member 6	Abca6	ABCA6_MOUSE	X		183283
Acyl-CoA dehydrogenase family member 10 (ACAD-10) (EC 1.3.99.-)	Acad10	ACD10_MOUSE	X		118979
Phosphoacetylglucosamine mutase (PAGM) (EC 5.4.2.3) (Acetylglucosamine phosphomutase) (N-acetylglucosamine-phosphate mutase) (Phosphoglucomutase-3) (PGM 3)	Pgm3 Agm1 Pgm-3	AGM1_MOUSE	X		59453
Annexin A1 (Annexin I) (Annexin-1) (Calpactin II) (Calpactin-2) (Chromobindin-9) (Lipocortin I) (Phospholipase A2 inhibitory protein) (p35)	Anxa1 Anx1 Lpc-1 Lpc1	ANXA1_MOUSE	X		38734
Retina-specific copper amine oxidase (RAO) (EC 1.4.3.21) (Amine oxidase [copper-containing])	Aoc2	AOC2_MOUSE	X		83583
AP-2 complex subunit alpha-1 (100 kDa coated vesicle protein A) (Adaptor protein complex AP-2 subunit alpha-1) (Adaptor-related protein complex 2 subunit alpha-1) (Alpha-adaptin A) (Alpha1-adaptin) (Clathrin assembly protein complex 2 alpha-A large chain) (Plasma membrane adaptor HA2/AP2 adaptin alpha A subunit)	Ap2a1 Adtaa Clapa1	AP2A1_MOUSE	X		107664
AP-2 complex subunit mu (AP-2 mu chain) (Adaptor protein complex AP-2 subunit mu) (Adaptor-related protein complex 2 subunit mu) (Clathrin assembly protein complex 2 mu medium chain) (Clathrin coat assembly protein AP50) (Clathrin coat-associated protein AP50) (Mu2-adaptin) (Plasma membrane adaptor AP-2 50 kDa protein)	Ap2m1 Clapm1	AP2M1_MOUSE	X		49655
Rho guanine nucleotide exchange factor 18	Arhgef18 Kiaa0521	ARHGI_MOUSE	X		114336
Asparagine synthetase [glutamine-hydrolyzing] (EC 6.3.5.4) (Glutamine-dependent asparagine synthetase)	Asns	ASNS_MOUSE	X		64283
Sodium/potassium-transporting ATPase subunit alpha-1 (Na(+)/K(+) ATPase alpha-1 subunit) (EC 3.6.3.9) (Sodium pump subunit alpha-1)	Atp1a1	AT1A1_MOUSE	X		112982
Serine/threonine-protein kinase ATR (EC 2.7.11.1) (Ataxia telangiectasia and Rad3-related protein)	Atr Kiaa4069	ATR_MOUSE	X		300224
Beta-ureidopropionase (EC 3.5.1.6) (Beta-alanine synthase) (N-carbamoyl-beta-alanine amidohydrolase)	Upb1	BUP1_MOUSE	X		43937
Caspase-2 (CASP-2) (EC 3.4.22.55) (Neural precursor cell expressed developmentally down-regulated protein 2) (NEDD-2) (Protease ICH-1) [Cleaved into: Caspase-2 subunit p18; Caspase-2 subunit p13; Caspase-2 subunit p12]	Casp2 Ich1 Nedd-2 Nedd2	CASP2_MOUSE	X		50661
Cathepsin Z (EC 3.4.18.1)	Ctsz	CATZ_MOUSE	X		33996
F-actin-capping protein subunit alpha-2 (CapZ alpha-2)	Capza2 Cappa2	CAZA2_MOUSE	X		32967
Carboxypeptidase Q (EC 3.4.17.-) (Hematopoietic lineage switch 2) (Plasma glutamate carboxypeptidase)	Cpq Hls2 Pgcp	CBPQ_MOUSE	X		51813
Coiled-coil domain-containing protein 110	Ccdc110 Gm172	CC110_MOUSE	X		96356
Coiled-coil domain-containing protein 88B (Hook-related protein 3) (HkRP3)	Ccdc88b Ccdc88	CC88B_MOUSE	X		166608
Cell division cycle protein 123 homolog	Cdc123	CD123_MOUSE	X		38816
Chromodomain-helicase-DNA-binding protein 6 (CHD-6) (EC 3.6.4.12) (ATP-dependent helicase CHD6)	Chd6 Kiaa1335	CHD6_MOUSE	X		305397
Chitinase-like protein 3 (EC 3.2.1.52) (Beta-N-acetylhexosaminidase Ym1) (Chitinase-3-like protein 3) (ECF-L) (Eosinophil chemotactic cytokine) (Secreted protein Ym1)	Chil3 Chi3l3 Ym1	CHIL3_MOUSE	X		44458
Cytochrome P450 1A2 (EC 1.14.14.1) (CYPIA2) (Cytochrome P450-P2) (Cytochrome P450-P3)	Cyp1a2 Cyp1a-2	CP1A2_MOUSE	X		58184
Cytochrome P450 2C29 (EC 1.14.14.1) (Aldehyde oxygenase) (CYPIIC29) (Cytochrome P-450 MUT-2)	Cyp2c29	CP2CT_MOUSE	X		55716
Cytochrome P450 2D11 (EC 1.14.14.1) (CYPIID11) (Cytochrome P450-16-alpha) (Cytochrome P450CC) (Testosterone 16-alpha hydroxylase)	Cyp2d11 Cyp2d-11	CP2DB_MOUSE	X		56988
Copine-9 (Copine IX)	Cpne9	CPNE9_MOUSE	X		61852
Dynein assembly factor 5, axonemal (HEAT repeat-containing protein 2)	Dnaaf5 Heatr2	DAAF5_MOUSE	X		93851
Dynein heavy chain 17, axonemal (Axonemal beta dynein heavy chain 17) (Ciliary dynein heavy chain 17)	Dnah17 Dnahc17 Kiaa3028	DYH17_MOUSE	X		511603
Epidermal growth factor receptor (EC 2.7.10.1)	Egfr	EGFR_MOUSE	X		134853
ES1 protein homolog, mitochondrial	D10Jhu81e	ES1_MOUSE	X		28090
Carboxylesterase 1E (EC 3.1.1.1) (Egasyn) (Liver carboxylesterase 22) (Es-22) (Esterase-22)	Ces1e Es22	EST1E_MOUSE	X		61582
Acylcarnitine hydrolase (ACH M1) (EC 3.1.1.28) (Carboxylesterase 2) (CES 2) (Peroxisome proliferator-inducible acylcarnitine hydrolase)	Ces2c Ces2	EST2C_MOUSE	X		62470
Ezrin (Cytovillin) (Villin-2) (p81)	Ezr Vil2	EZRI_MOUSE	X		69407
Protein FAM196B	Fam196b	F196B_MOUSE	X		59102
Focal adhesion kinase 1 (FADK 1) (EC 2.7.10.2) (Focal adhesion kinase-related nonkinase) (FRNK) (Protein-tyrosine kinase 2) (p125FAK) (pp125FAK)	Ptk2 Fadk Fak Fak1 Kiaa4203	FAK1_MOUSE	X		123537
F-box only protein 6 (F-box only protein 6b) (F-box protein that recognizes sugar chains 2) (F-box/G-domain protein 2)	Fbxo6 Fbs2 Fbxo6b	FBX6_MOUSE	X		34493
Far upstream element-binding protein 2 (FUSE-binding protein 2) (KH type-splicing regulatory protein) (KSRP)	Khsrp Fubp2	FUBP2_MOUSE	X		76775
Neutral alpha-glucosidase C (EC 3.2.1.-)	Ganc	GANC_MOUSE	X		102008
Histone H1.3 (H1 VAR.4) (H1d)	Hist1h1d H1f3	H13_MOUSE	X		22100
Histone H2A type 1-H	Hist1h2ah	H2A1H_MOUSE	X		13950
Histone H2A type 2-B (H2a-613A)	Hist2h2ab	H2A2B_MOUSE	X		14013
Histone H2B type 2-E (H2b 613)	Hist2h2be	H2B2E_MOUSE	X		13993
Histone H2B type 3-B	Hist3h2bb Hist3h2bb-ps	H2B3B_MOUSE	X		13908
H-2 class I histocompatibility antigen, K-B alpha chain (H-2K(B))	H2-K1 H2-K	HA1B_MOUSE	X		41302
E3 ubiquitin-protein ligase HERC2 (EC 6.3.2.-) (HECT domain and RCC1-like domain-containing protein 2)	Herc2 Jdf2 Kiaa0393 Rjs	HERC2_MOUSE	X		527456
Indoleamine 2,3-dioxygenase 2 (IDO-2) (EC 1.13.11.-) (Indoleamine 2,3-dioxygenase-like protein 1) (Indoleamine-pyrrole 2,3-dioxygenase-like protein 1)	Ido2 Indol1	I23O2_MOUSE	X		44468
Eukaryotic translation initiation factor 2 subunit 3, X-linked (Eukaryotic translation initiation factor 2 subunit gamma, X-linked) (eIF-2-gamma X)	Eif2s3x	IF2G_MOUSE	X		51065
Ig kappa chain C region	0	IGKC_MOUSE	X		11778
Ras GTPase-activating-like protein IQGAP1	Iqgap1	IQGA1_MOUSE	X		188742
Keratin, type II cytoskeletal 2 epidermal (Cytokeratin-2e) (CK-2e) (Epithelial keratin-2e) (Keratin-2 epidermis) (Keratin-2e) (K2e) (Type-II keratin Kb2)	Krt2 K2e Krt2-17 Krt2a	K22E_MOUSE	X		70923
Keratin, type II cytoskeletal 73 (Cytokeratin-73) (CK-73) (Keratin-73) (K73) (Type II inner root sheath-specific keratin-K6irs3) (Type-II keratin Kb36)	Krt73 Kb36	K2C73_MOUSE	X		58911
Glycine N-acyltransferase-like protein Keg1 (EC 2.3.1.13) (Acyl-CoA:glycine N-acyltransferase protein Keg1) (Kidney-expressed gene 1 protein)	Keg1	KEG1_MOUSE	X		33723
Microtubule-associated protein 10 (Microtubule regulator of 120 KDa)	Map10 Kiaa1383	MAP10_MOUSE	X		96155
Microtubule-associated serine/threonine-protein kinase 2 (EC 2.7.11.1)	Mast2 Mast205	MAST2_MOUSE	X		190534
Monoglyceride lipase (MGL) (EC 3.1.1.23) (Monoacylglycerol lipase) (MAGL)	Mgll	MGLL_MOUSE	X		33388
Neutrophil cytosol factor 2 (NCF-2) (67 kDa neutrophil oxidase factor) (NADPH oxidase activator 2) (Neutrophil NADPH oxidase factor 2) (p67-phox)	Ncf2 Noxa2 P67phox	NCF2_MOUSE	X		59485
Nucleolin (Protein C23)	Ncl Nuc	NUCL_MOUSE	X		76723
Phytanoyl-CoA dioxygenase, peroxisomal (EC 1.14.11.18) (Lupus nephritis-associated peptide 1) (Phytanic acid oxidase) (Phytanoyl-CoA alpha-hydroxylase) (PhyH)	Phyh Ln1 Lnap1 Pahx	PAHX_MOUSE	X		38607
Pericentrin	Pcnt Pcnt2	PCNT_MOUSE	X		329465
Plastin-2 (65 kDa macrophage protein) (L-plastin) (Lymphocyte cytosolic protein 1) (LCP-1) (pp65)	Lcp1 Pls2	PLSL_MOUSE	X		70149
Proteasome subunit alpha type-3 (EC 3.4.25.1) (Macropain subunit C8) (Multicatalytic endopeptidase complex subunit C8) (Proteasome component C8) (Proteasome subunit K)	Psma3	PSA3_MOUSE	X		28405
Proteasome subunit beta type-4 (EC 3.4.25.1) (Low molecular mass protein 3) (Macropain beta chain) (Multicatalytic endopeptidase complex beta chain) (Proteasome beta chain) (Proteasome chain 3)	Psmb4 Lmp3	PSB4_MOUSE	X		29116
Glycogen phosphorylase, muscle form (EC 2.4.1.1) (Myophosphorylase)	Pygm	PYGM_MOUSE	X		97286
Histone-binding protein RBBP7 (Histone acetyltransferase type B subunit 2) (Nucleosome-remodeling factor subunit RBAP46) (Retinoblastoma-binding protein 7) (RBBP-7) (Retinoblastoma-binding protein p46)	Rbbp7 Rbap46	RBBP7_MOUSE	X		47790
N-acylglucosamine 2-epimerase (AGE) (EC 5.1.3.8) (GlcNAc 2-epimerase) (N-acetyl-D-glucosamine 2-epimerase) (Renin-binding protein) (RnBP)	Renbp	RENBP_MOUSE	X		49771
60S ribosomal protein L14	Rpl14	RL14_MOUSE	X		23564
Dolichyl-diphosphooligosaccharide--protein glycosyltransferase subunit 2 (EC 2.4.99.18) (Dolichyl-diphosphooligosaccharide--protein glycosyltransferase 63 kDa subunit) (Ribophorin II) (RPN-II) (Ribophorin-2)	Rpn2	RPN2_MOUSE	X		69063
Ribosome-binding protein 1 (Ribosome receptor protein) (RRp) (mRRp)	Rrbp1	RRBP1_MOUSE	X		172879
Scavenger receptor class A member 3	Scara3	SCAR3_MOUSE	X		65471
Septin-11	Sept11 D5Ertd606e	SEP11_MOUSE	X		49695
Signal-induced proliferation-associated 1-like protein 1 (SIPA1-like protein 1)	Sipa1l1 Kiaa0440	SI1L1_MOUSE	X		197031
S-phase kinase-associated protein 1 (Cyclin-A/CDK2-associated protein p19) (S-phase kinase-associated protein 1A) (p19A) (p19skp1)	Skp1 Skp1a	SKP1_MOUSE	X		18672
Beta-1-syntrophin (59 kDa dystrophin-associated protein A1 basic component 1) (DAPA1B) (Syntrophin-2)	Sntb1 Snt2b1	SNTB1_MOUSE	X		58081
Spermatogenesis-associated protein 5 (Spermatogenesis-associated factor protein)	Spata5 Spaf	SPAT5_MOUSE	X		97256
Spectrin beta chain, non-erythrocytic 1 (Beta-II spectrin) (Embryonic liver fodrin) (Fodrin beta chain)	Sptbn1 Elf Spnb-2 Spnb2 Sptb2	SPTB2_MOUSE	X		274223
Starch-binding domain-containing protein 1 (Genethonin-1) (Glycophagy cargo receptor stbd1)	Stbd1 D5Ertd593e	STBD1_MOUSE	X		36127
Serine-threonine kinase receptor-associated protein (UNR-interacting protein)	Strap Unrip	STRAP_MOUSE	X		38442
Stereocilin	Strc	STRC_MOUSE	X		196347
Histidine--tRNA ligase, cytoplasmic (EC 6.1.1.21) (Histidyl-tRNA synthetase) (HisRS)	Hars	SYHC_MOUSE	X		57432
Translationally-controlled tumor protein (TCTP) (21 kDa polypeptide) (p21) (p23)	Tpt1 Trt	TCTP_MOUSE	X		19462
Prostaglandin E synthase 3 (EC 5.3.99.3) (Cytosolic prostaglandin E2 synthase) (cPGES) (Hsp90 co-chaperone) (Progesterone receptor complex p23) (Sid 3177) (Telomerase-binding protein p23)	Ptges3 Sid3177 Tebp	TEBP_MOUSE	X		18721
Transketolase-like protein 2 (EC 2.2.1.1)	Tktl2	TKTL2_MOUSE	X		68447
Talin-2	Tln2	TLN2_MOUSE	X		253621
Traf2 and NCK-interacting protein kinase (EC 2.7.11.1)	Tnik Kiaa0551	TNIK_MOUSE	X		150367
EKC/KEOPS complex subunit Tprkb (TP53RK-binding protein)	Tprkb	TPRKB_MOUSE	X		19556
Ubiquitin-conjugating enzyme E2 variant 1 (UEV-1) (CROC-1)	Ube2v1 Croc1	UB2V1_MOUSE	X		16355
Ubiquitin-protein ligase E3B (EC 6.3.2.-)	Ube3b	UBE3B_MOUSE	X		122762
2-oxo-4-hydroxy-4-carboxy-5-ureidoimidazoline decarboxylase (OHCU decarboxylase) (EC 4.1.1.97) (Parahox neighbor) (Ureidoimidazoline (2-oxo-4-hydroxy-4-carboxy-5-) decarboxylase)	Urad Prhoxnb	URAD_MOUSE	X		20017
Small subunit processome component 20 homolog (Down-regulated in metastasis protein)	Utp20 Drim	UTP20_MOUSE	X		317744
Vimentin	Vim	VIME_MOUSE	X		53688
6-phosphogluconolactonase (6PGL) (EC 3.1.1.31)	Pgls	6PGL_MOUSE		X	27254
Alpha-2-macroglobulin-P (Alpha-2-macroglobulin)	A2m A2mp	A2MG_MOUSE		X	164353
5'-AMP-activated protein kinase subunit gamma-1 (AMPK gamma1) (AMPK subunit gamma-1) (AMPKg)	Prkag1 Prkaac	AAKG1_MOUSE		X	37520
Putative aspartate aminotransferase, cytoplasmic 2 (EC 2.6.1.-) (Glutamate oxaloacetate transaminase 1-like protein 1) (Transaminase A-like protein 1)	Got1l1	AATC2_MOUSE		X	45458
ATP-binding cassette sub-family D member 3 (68 kDa peroxisomal membrane protein) (PMP68) (70 kDa peroxisomal membrane protein) (PMP70)	Abcd3 Pmp70 Pxmp1	ABCD3_MOUSE		X	75475
Acetyl-CoA carboxylase 2 (EC 6.4.1.2) (ACC-beta) [Includes: Biotin carboxylase (EC 6.3.4.14)]	Acacb Acc2 Accb	ACACB_MOUSE		X	275750
Isobutyryl-CoA dehydrogenase, mitochondrial (EC 1.3.99.-) (Acyl-CoA dehydrogenase family member 8) (ACAD-8)	Acad8	ACAD8_MOUSE		X	45020
Acyl-coenzyme A thioesterase 12 (Acyl-CoA thioesterase 12) (EC 3.1.2.1) (Acyl-CoA thioester hydrolase 12) (Cytoplasmic acetyl-CoA hydrolase 1) (CACH-1) (mCACH-1)	Acot12 Cach Cach1	ACO12_MOUSE		X	61762
Acyl-coenzyme A thioesterase 4 (Acyl-CoA thioesterase 4) (EC 3.1.2.2) (PTE-2b) (Peroxisomal acyl coenzyme A thioester hydrolase Ib) (Peroxisomal long-chain acyl-CoA thioesterase Ib) (PTE-Ib)	Acot4 Pte1b Pte2b	ACOT4_MOUSE		X	46481
Acyl-coenzyme A thioesterase 5 (Acyl-CoA thioesterase 5) (EC 3.1.2.2) (Peroxisomal acyl-coenzyme A thioester hydrolase Ic) (Peroxisomal acyl-CoA thioesterase Ic)	Acot5	ACOT5_MOUSE		X	46573
Acyl-CoA synthetase short-chain family member 3, mitochondrial (EC 6.2.1.1)	Acss3	ACSS3_MOUSE		X	74518
Actin, aortic smooth muscle (Alpha-actin-2)	Acta2 Actsa Actvs	ACTA_MOUSE		X	42009
N-acyl-aromatic-L-amino acid amidohydrolase (carboxylate-forming) (EC 3.5.1.114) (Acylase III) (Aminoacylase III) (AAIII) (Aminoacylase-3) (ACY-3) (Aspartoacylase-2) (Hepatitis C virus core-binding protein 1) (HCBP1)	Acy3 Aspa2	ACY3_MOUSE		X	35286
Alcohol dehydrogenase class 4 mu/sigma chain (EC 1.1.1.1) (ADH-C2) (Alcohol dehydrogenase 7) (Alcohol dehydrogenase class IV mu/sigma chain) (Gastric alcohol dehydrogenase) (Retinol dehydrogenase)	Adh7 Adh-3 Adh3	ADH7_MOUSE		X	39904
Aminoacyl tRNA synthase complex-interacting multifunctional protein 1 (Multisynthase complex auxiliary component p43) [Cleaved into: Endothelial monocyte-activating polypeptide 2 (EMAP-2) (Endothelial monocyte-activating polypeptide II) (EMAP-II) (Small inducible cytokine subfamily E member 1)]	Aimp1 Emap2 Scye1	AIMP1_MOUSE		X	33997
Aminoacyl tRNA synthase complex-interacting multifunctional protein 2 (Multisynthase complex auxiliary component p38) (Protein JTV-1)	Aimp2 Jtv1	AIMP2_MOUSE		X	35378
1,5-anhydro-D-fructose reductase (AF reductase) (EC 1.1.1.263) (Aldo-keto reductase family 1 member C-like protein 2) (Aldo-keto reductase family 1 member E1) (Aldo-keto reductase family 1 member E2)	Akr1e2 Akr1cl2 Akr1e1	AKCL2_MOUSE		X	34461
AT-hook-containing transcription factor	Akna Kiaa1968	AKNA_MOUSE		X	153123
Aldose reductase (AR) (EC 1.1.1.21) (Aldehyde reductase)	Akr1b1 Akr1b3 Aldor1 Aldr1	ALDR_MOUSE		X	35732
Aminopeptidase B (AP-B) (EC 3.4.11.6) (Arginine aminopeptidase) (Arginyl aminopeptidase) (Cytosol aminopeptidase IV)	Rnpep	AMPB_MOUSE		X	72416
Aminopeptidase N (AP-N) (mAPN) (EC 3.4.11.2) (Alanyl aminopeptidase) (Aminopeptidase M) (AP-M) (Membrane protein p161) (Microsomal aminopeptidase) (CD antigen CD13)	Anpep Lap-1 Lap1	AMPN_MOUSE		X	109651
Aldehyde oxidase 1 (EC 1.2.3.1) (Azaheterocycle hydroxylase 1) (EC 1.17.3.-) (Retinal oxidase)	Aox1 Ao Ro	AOXA_MOUSE		X	146678
AP-1 complex subunit gamma-1 (Adaptor protein complex AP-1 subunit gamma-1) (Adaptor-related protein complex 1 subunit gamma-1) (Clathrin assembly protein complex 1 gamma-1 large chain) (Gamma-adaptin) (Gamma1-adaptin) (Golgi adaptor HA1/AP1 adaptin subunit gamma-1)	Ap1g1 Adtg Clapg1	AP1G1_MOUSE		X	91350
Acylamino-acid-releasing enzyme (AARE) (EC 3.4.19.1) (Acyl-peptide hydrolase) (APH) (Acylaminoacyl-peptidase)	Apeh	APEH_MOUSE		X	81581
Adipocyte plasma membrane-associated protein (Protein DD16)	Apmap	APMAP_MOUSE		X	46434
Apolipoprotein B-100 (Apo B-100) [Cleaved into: Apolipoprotein B-48 (Apo B-48)]	Apob	APOB_MOUSE		X	509432
Adenine phosphoribosyltransferase (APRT) (EC 2.4.2.7)	Aprt	APT_MOUSE		X	19724
Rho guanine nucleotide exchange factor 2 (Guanine nucleotide exchange factor H1) (GEF-H1) (LBC'S first cousin) (Lymphoid blast crisis-like 1) (Oncogene LFC) (Rhobin)	Arhgef2 Kiaa0651 Lbcl1 Lfc	ARHG2_MOUSE		X	111974
Actin-related protein 2/3 complex subunit 3 (Arp2/3 complex 21 kDa subunit) (p21-ARC)	Arpc3	ARPC3_MOUSE		X	20525
Abnormal spindle-like microcephaly-associated protein homolog (Calmodulin-binding protein Sha1) (Calmodulin-binding protein 1) (Spindle and hydroxyurea checkpoint abnormal protein)	Aspm Calmbp1 Sha1	ASPM_MOUSE		X	364218
ATP synthase F(0) complex subunit B1, mitochondrial (ATP synthase subunit b) (ATPase subunit b)	Atp5f1	AT5F1_MOUSE		X	28949
Ubiquitin-like modifier-activating enzyme ATG7 (ATG12-activating enzyme E1 ATG7) (Autophagy-related protein 7) (APG7-like) (mAGP7) (Ubiquitin-activating enzyme E1-like protein)	Atg7 Apg7l	ATG7_MOUSE		X	77520
ATP synthase subunit e, mitochondrial (ATPase subunit e)	Atp5i Atp5k Lfm-1 Lfm1	ATP5I_MOUSE		X	8236
A disintegrin and metalloproteinase with thrombospondin motifs 16 (ADAM-TS 16) (ADAM-TS16) (ADAMTS-16) (EC 3.4.24.-)	Adamts16 Kiaa2029	ATS16_MOUSE		X	136282
Band 3 anion transport protein (Anion exchange protein 1) (AE 1) (Anion exchanger 1) (MEB3) (Solute carrier family 4 member 1) (CD antigen CD233)	Slc4a1 Ae1	B3AT_MOUSE		X	103136
Basigin (Basic immunoglobulin superfamily) (HT7 antigen) (Membrane glycoprotein gp42) (CD antigen CD147)	Bsg	BASI_MOUSE		X	42445
MHC class II transactivator (CIITA) (EC 2.3.1.-) (EC 2.7.11.1)	Ciita C2ta Mhc2ta	C2TA_MOUSE		X	127528
Voltage-dependent P/Q-type calcium channel subunit alpha-1A (Brain calcium channel I) (BI) (Calcium channel, L type, alpha-1 polypeptide isoform 4) (Voltage-gated calcium channel subunit alpha Cav2.1)	Cacna1a Caca1a Cach4 Cacn3 Cacnl1a4 Ccha1a	CAC1A_MOUSE		X	267647
Voltage-dependent N-type calcium channel subunit alpha-1B (Brain calcium channel III) (BIII) (Calcium channel, L type, alpha-1 polypeptide isoform 5) (Voltage-gated calcium channel subunit alpha Cav2.2)	Cacna1b Cach5 Cacnl1a5 Cchn1a	CAC1B_MOUSE		X	261481
Voltage-dependent R-type calcium channel subunit alpha-1E (Brain calcium channel II) (BII) (Calcium channel, L type, alpha-1 polypeptide, isoform 6) (Voltage-gated calcium channel subunit alpha Cav2.3)	Cacna1e Cach6 Cacnl1a6 Cchra1	CAC1E_MOUSE		X	257236
Carnitine O-acetyltransferase (Carnitine acetylase) (EC 2.3.1.7) (Carnitine acetyltransferase) (CAT) (CrAT)	Crat	CACP_MOUSE		X	70840
Calnexin	Canx	CALX_MOUSE		X	67278
Calpain-2 catalytic subunit (EC 3.4.22.53) (80 kDa M-calpain subunit) (CALP80) (Calcium-activated neutral proteinase 2) (CANP 2) (Calpain M-type) (Calpain-2 large subunit) (Millimolar-calpain) (M-calpain)	Capn2	CAN2_MOUSE		X	79872
F-actin-capping protein subunit beta (CapZ beta)	Capzb Cappb1	CAPZB_MOUSE		X	31345
Pro-cathepsin H (Cathepsin B3) (Cathepsin BA) [Cleaved into: Cathepsin H mini chain; Cathepsin H (EC 3.4.22.16); Cathepsin H heavy chain; Cathepsin H light chain]	Ctsh	CATH_MOUSE		X	37170
Corticosteroid-binding globulin (CBG) (Serpin A6) (Transcortin)	Serpina6 Cbg	CBG_MOUSE		X	44769
Coiled-coil domain-containing protein 112	Ccdc112	CC112_MOUSE		X	52777
Coiled-coil domain-containing protein 113	Ccdc113	CC113_MOUSE		X	44215
Coiled-coil domain-containing protein 114	Ccdc114	CC114_MOUSE		X	74120
Coiled-coil domain-containing protein 47 (Adipocyte-specific protein 4)	Ccdc47 Asp4	CCD47_MOUSE		X	55844
Carcinoembryonic antigen-related cell adhesion molecule 1 (Biliary glycoprotein 1) (BGP-1) (Biliary glycoprotein D) (MHVR1) (Murine hepatitis virus receptor) (MHV-R) (CD antigen CD66a)	Ceacam1 Bgp Bgp1 Bgpd	CEAM1_MOUSE		X	57016
UPF0598 protein C8orf82 homolog	0	CH082_MOUSE		X	24330
Choline/ethanolamine kinase (Choline kinase beta) (CK) (CKB) (EC 2.7.1.32) (Ethanolamine kinase) (EK) (EC 2.7.1.82) (choline/ethanolamine kinase beta) (CKEKB)	Chkb Chetk Chkl	CHKB_MOUSE		X	45126
Cholinesterase (EC 3.1.1.8) (Acylcholine acylhydrolase) (Butyrylcholine esterase) (Choline esterase II) (Pseudocholinesterase)	Bche	CHLE_MOUSE		X	68462
Cysteine and histidine-rich domain-containing protein 1 (CHORD domain-containing protein 1) (CHORD-containing protein 1) (Chp-1) (Protein morgana)	Chordc1 Chp1 Morgana	CHRD1_MOUSE		X	37351
CAP-Gly domain-containing linker protein 2 (Cytoplasmic linker protein 115) (CLIP-115) (Cytoplasmic linker protein 2)	Clip2 Cyln2 Kiaa0291	CLIP2_MOUSE		X	115910
UPF0317 protein C14orf159 homolog, mitochondrial	0	CN159_MOUSE		X	66366
Cytosolic non-specific dipeptidase (EC 3.4.13.18) (CNDP dipeptidase 2) (Glutamate carboxypeptidase-like protein 1)	Cndp2 Cn2	CNDP2_MOUSE		X	52767
Collagen alpha-1(XIV) chain	Col14a1	COEA1_MOUSE		X	193013
Coatomer subunit beta (Beta-coat protein) (Beta-COP)	Copb1 Copb	COPB_MOUSE		X	107066
Coactosin-like protein	Cotl1 Clp	COTL1_MOUSE		X	15944
Cytochrome c oxidase subunit 5A, mitochondrial (Cytochrome c oxidase polypeptide Va)	Cox5a	COX5A_MOUSE		X	16101
Cytochrome c oxidase subunit 5B, mitochondrial (Cytochrome c oxidase polypeptide Vb)	Cox5b	COX5B_MOUSE		X	13813
Steroid 17-alpha-hydroxylase/17,20 lyase (EC 1.14.99.9) (EC 4.1.2.30) (17-alpha-hydroxyprogesterone aldolase) (CYPXVII) (Cytochrome P450 17A1) (Cytochrome P450-C17) (Cytochrome P450c17)	Cyp17a1 Cyp17	CP17A_MOUSE		X	57638
Cytochrome P450 2C37 (EC 1.14.14.1) (CYPIIC37)	Cyp2c37	CP237_MOUSE		X	55606
Cytochrome P450 2A5 (EC 1.14.14.1) (CYPIIA5) (Coumarin 7-hydroxylase) (Cytochrome P450-15-COH) (Cytochrome P450-IIA3.2)	Cyp2a5 Cyp2a-5	CP2A5_MOUSE		X	56741
Cytochrome P450 2A12 (EC 1.14.14.1) (CYPIIA12) (Steroid hormones 7-alpha-hydroxylase) (Testosterone 7-alpha-hydroxylase)	Cyp2a12	CP2AC_MOUSE		X	56179
Cytochrome P450 3A41 (EC 1.14.14.1)	Cyp3a41a Cyp3a41; Cyp3a41b	CP341_MOUSE		X	57987
Cytochrome P450 3A11 (EC 1.14.14.1) (CYPIIIA11) (Cytochrome P-450IIIAM1) (Cytochrome P-450UT)	Cyp3a11 Cyp3a-11	CP3AB_MOUSE		X	57855
Copine-5 (Copine V)	Cpne5	CPNE5_MOUSE		X	65592
Copine-8 (Copine VIII)	Cpne8	CPNE8_MOUSE		X	64667
Carnitine O-palmitoyltransferase 1, liver isoform (CPT1-L) (EC 2.3.1.21) (Carnitine O-palmitoyltransferase I, liver isoform) (CPT I) (CPTI-L) (Carnitine palmitoyltransferase 1A)	Cpt1a Cpt-1 Cpt1	CPT1A_MOUSE		X	88251
Catenin beta-1 (Beta-catenin)	Ctnnb1 Catnb	CTNB1_MOUSE		X	85471
Cubilin (Intrinsic factor-cobalamin receptor)	Cubn Ifcr	CUBN_MOUSE		X	399097
Cytochrome c1, heme protein, mitochondrial (Complex III subunit 4) (Complex III subunit IV) (Cytochrome b-c1 complex subunit 4) (Ubiquinol-cytochrome-c reductase complex cytochrome c1 subunit) (Cytochrome c-1)	Cyc1	CY1_MOUSE		X	35328
Cytochrome b5 type B (Cytochrome b5 outer mitochondrial membrane isoform)	Cyb5b Cyb5m	CYB5B_MOUSE		X	16318
L-xylulose reductase (XR) (EC 1.1.1.10) (Dicarbonyl/L-xylulose reductase)	Dcxr	DCXR_MOUSE		X	25746
ATP-dependent RNA helicase DDX1 (EC 3.6.4.13) (DEAD box protein 1)	Ddx1	DDX1_MOUSE		X	82500
ATP-dependent RNA helicase DDX3X (EC 3.6.4.13) (D1Pas1-related sequence 2) (DEAD box RNA helicase DEAD3) (mDEAD3) (DEAD box protein 3, X-chromosomal) (Embryonic RNA helicase)	Ddx3x D1Pas1-rs2 Ddx3 Dead3 Erh	DDX3X_MOUSE		X	73101
Probable ATP-dependent RNA helicase DDX41 (EC 3.6.4.13) (DEAD box protein 41)	Ddx41	DDX41_MOUSE		X	69820
Estradiol 17-beta-dehydrogenase 11 (EC 1.1.1.62) (17-beta-hydroxysteroid dehydrogenase 11) (17-beta-HSD 11) (17bHSD11) (17betaHSD11) (17-beta-hydroxysteroid dehydrogenase XI) (17-beta-HSD XI) (17betaHSDXI) (Dehydrogenase/reductase SDR family member 8)	Hsd17b11 Dhrs8 Pan1b	DHB11_MOUSE		X	32881
Mitochondrial dicarboxylate carrier (Solute carrier family 25 member 10)	Slc25a10 Dic	DIC_MOUSE		X	31715
DnaJ homolog subfamily B member 11 (APOBEC1-binding protein 2) (ABBP-2) (ER-associated DNAJ) (ER-associated Hsp40 co-chaperone) (Endoplasmic reticulum DNA J domain-containing protein 3) (ER-resident protein ERdj3) (ERdj3) (ERj3p)	Dnajb11	DJB11_MOUSE		X	40555
DmX-like protein 1 (X-like 1 protein)	Dmxl1	DMXL1_MOUSE		X	336008
DnaJ homolog subfamily C member 3 (Interferon-induced, double-stranded RNA-activated protein kinase inhibitor) (Protein kinase inhibitor of 58 kDa) (Protein kinase inhibitor p58)	Dnajc3 P58ipk	DNJC3_MOUSE		X	57464
Dedicator of cytokinesis protein 8	Dock8	DOCK8_MOUSE		X	238978
Dipeptidyl peptidase 9 (DP9) (EC 3.4.14.5) (Dipeptidyl peptidase IX) (DPP IX) (Dipeptidyl peptidase-like protein 9) (DPLP9)	Dpp9	DPP9_MOUSE		X	98001
E3 ubiquitin-protein ligase DTX3L (EC 6.3.2.-) (Protein deltex-3-like)	Dtx3l Bbap	DTX3L_MOUSE		X	83044
Dual specificity protein phosphatase 3 (EC 3.1.3.16) (EC 3.1.3.48) (T-DSP11) (Vaccinia H1-related phosphatase) (VHR)	Dusp3	DUS3_MOUSE		X	20472
ATP-dependent RNA helicase DDX39A (EC 3.6.4.13) (DEAD box protein 39)	Ddx39a Ddx39	DX39A_MOUSE		X	49067
Dynein heavy chain 12, axonemal (Axonemal beta dynein heavy chain 12) (Axonemal dynein heavy chain 12-like protein) (Axonemal dynein heavy chain 7-like protein) (Ciliary dynein heavy chain 12)	Dnah12 Dnah12l Dnah7l Dnahc12 Dnahc7l	DYH12_MOUSE		X	356231
Dual specificity tyrosine-phosphorylation-regulated kinase 1A (EC 2.7.12.1) (Dual specificity YAK1-related kinase) (MP86) (Protein kinase minibrain homolog) (MNBH)	Dyrk1a Dyrk	DYR1A_MOUSE		X	85494
Enoyl-CoA hydratase domain-containing protein 3, mitochondrial	Echdc3	ECHD3_MOUSE		X	32402
Enoyl-CoA delta isomerase 2, mitochondrial (EC 5.3.3.8) (Delta(3),delta(2)-enoyl-CoA isomerase) (D3,D2-enoyl-CoA isomerase) (Dodecenoyl-CoA isomerase) (Peroxisomal 3,2-trans-enoyl-CoA isomerase) (pECI)	Eci2 Peci	ECI2_MOUSE		X	43268
Elongation factor 1-alpha 2 (EF-1-alpha-2) (Eukaryotic elongation factor 1 A-2) (eEF1A-2) (Statin-S1)	Eef1a2 Eef1al Stn	EF1A2_MOUSE		X	50454
Eukaryotic translation initiation factor 3 subunit F (eIF3f) (Deubiquitinating enzyme eIF3f) (EC 3.4.19.12) (Eukaryotic translation initiation factor 3 subunit 5) (eIF-3-epsilon) (eIF3 p47)	Eif3f Eif3s5	EIF3F_MOUSE		X	37984
Eukaryotic translation initiation factor 3 subunit K (eIF3k) (Eukaryotic translation initiation factor 3 subunit 12) (eIF-3 p25)	Eif3k Eif3s12	EIF3K_MOUSE		X	25087
Ephrin type-B receptor 6 (MEP) (Tyrosine-protein kinase-defective receptor EPH-6)	Ephb6 Cekl	EPHB6_MOUSE		X	110107
Endoplasmic reticulum aminopeptidase 1 (EC 3.4.11.-) (ARTS-1) (Adipocyte-derived leucine aminopeptidase) (A-LAP) (Aminopeptidase PILS) (Puromycin-insensitive leucyl-specific aminopeptidase) (PILS-AP) (VEGF-induced aminopeptidase)	Erap1 Appils Arts1	ERAP1_MOUSE		X	106599
Eukaryotic peptide chain release factor subunit 1 (Eukaryotic release factor 1) (eRF1)	Etf1	ERF1_MOUSE		X	49031
Endoplasmic reticulum resident protein 29 (ERp29)	Erp29	ERP29_MOUSE		X	28823
Endoplasmic reticulum resident protein 44 (ER protein 44) (ERp44) (Thioredoxin domain-containing protein 4)	Erp44 Kiaa0573 Txndc4	ERP44_MOUSE		X	46853
N-acetyltransferase ESCO2 (EC 2.3.1.-) (Establishment of cohesion 1 homolog 2) (ECO1 homolog 2)	Esco2	ESCO2_MOUSE		X	67273
Carboxylesterase 1C (EC 3.1.1.1) (Liver carboxylesterase N) (Lung surfactant convertase) (PES-N)	Ces1c Es1	EST1C_MOUSE		X	61056
Exostosin-2 (EC 2.4.1.224) (EC 2.4.1.225) (Glucuronosyl-N-acetylglucosaminyl-proteoglycan/N-acetylglucosaminyl-proteoglycan 4-alpha-N-acetylglucosaminyltransferase) (Multiple exostoses protein 2 homolog)	Ext2	EXT2_MOUSE		X	82064
Hsc70-interacting protein (Hip) (Protein FAM10A1) (Protein ST13 homolog)	St13 Fam10a1 Hip	F10A1_MOUSE		X	41656
Constitutive coactivator of PPAR-gamma-like protein 1 (Oxidative stress-associated Src activator) (Protein FAM120A)	FAM120A Kiaa0183 Ossa	F120A_MOUSE		X	121646
Fatty-acid amide hydrolase 1 (EC 3.5.1.99) (Anandamide amidohydrolase 1) (Oleamide hydrolase 1)	Faah Faah1	FAAH1_MOUSE		X	63221
Fatty acid-binding protein, epidermal (Epidermal-type fatty acid-binding protein) (E-FABP) (Fatty acid-binding protein 5) (Keratinocyte lipid-binding protein) (Psoriasis-associated fatty acid-binding protein homolog) (PA-FABP)	Fabp5 Fabpe Klbp Mal1	FABP5_MOUSE		X	15137
Acylpyruvase FAHD1, mitochondrial (EC 3.7.1.5) (Fumarylacetoacetate hydrolase domain-containing protein 1) (Oxaloacetate decarboxylase) (OAA decarboxylase) (EC 4.1.1.3)	Fahd1 MNCb-4134	FAHD1_MOUSE		X	25172
Fas-binding factor 1 (FBF-1)	Fbf1	FBF1_MOUSE		X	130138
Fermitin family homolog 2 (Kindlin-2) (Pleckstrin homology domain-containing family C member 1)	Fermt2 Plekhc1	FERM2_MOUSE		X	77800
Filamin-A (FLN-A) (Actin-binding protein 280) (ABP-280) (Alpha-filamin) (Endothelial actin-binding protein) (Filamin-1) (Non-muscle filamin)	Flna Fln Fln1	FLNA_MOUSE		X	281222
Filamin-B (FLN-B) (ABP-280-like protein) (Actin-binding-like protein) (Beta-filamin)	Flnb	FLNB_MOUSE		X	277825
Leucine-rich repeat transmembrane protein FLRT3 (Fibronectin leucine rich transmembrane protein 3)	Flrt3 Kiaa1469	FLRT3_MOUSE		X	72879
Dimethylaniline monooxygenase [N-oxide-forming] 1 (EC 1.14.13.8) (Dimethylaniline oxidase 1) (Hepatic flavin-containing monooxygenase 1) (FMO 1)	Fmo1 Fmo-1	FMO1_MOUSE		X	59915
Glyceraldehyde-3-phosphate dehydrogenase, testis-specific (EC 1.2.1.12) (Spermatogenic cell-specific glyceraldehyde 3-phosphate dehydrogenase 2) (GAPDH-2) (Spermatogenic glyceraldehyde-3-phosphate dehydrogenase)	Gapdhs Gapd-s Gapds	G3PT_MOUSE		X	47657
UDP-glucose 4-epimerase (EC 5.1.3.2) (Galactowaldenase) (UDP-N-acetylglucosamine 4-epimerase) (UDP-GlcNAc 4-epimerase) (EC 5.1.3.7) (UDP-galactosamine 4-epimerase) (UDP-GalNAc 4-epimerase) (UDP-galactose 4-epimerase)	Gale	GALE_MOUSE		X	38225
N-acetylgalactosamine kinase (EC 2.7.1.157) (GalNAc kinase) (Galactokinase 2)	Galk2	GALK2_MOUSE		X	50503
Guanidinoacetate N-methyltransferase (EC 2.1.1.2)	Gamt	GAMT_MOUSE		X	26336
Gephyrin [Includes: Molybdopterin adenylyltransferase (MPT adenylyltransferase) (EC 2.7.7.75) (Domain G); Molybdopterin molybdenumtransferase (MPT Mo-transferase) (EC 2.10.1.1) (Domain E)]	Gphn	GEPH_MOUSE		X	83282
Gamma-glutamyltransferase 7 (GGT 7) (EC 2.3.2.2) (Gamma-glutamyltransferase-like 3) (Gamma-glutamyltranspeptidase 7) (Glutathione hydrolase 7) (EC 3.4.19.13) [Cleaved into: Gamma-glutamyltransferase 7 heavy chain; Gamma-glutamyltransferase 7 light chain]	Ggt7 Ggtl3	GGT7_MOUSE		X	70251
Mitochondrial glutamate carrier 1 (GC-1) (Glutamate/H(+) symporter 1) (Solute carrier family 25 member 22)	Slc25a22 Gc1	GHC1_MOUSE		X	34670
Glyoxalase domain-containing protein 4	Glod4	GLOD4_MOUSE		X	33317
Glycine N-acyltransferase-like protein (EC 2.3.1.13) (Acyl-CoA:glycine N-acyltransferase-like) (AAc-like)	Gm4952	GLYAL_MOUSE		X	34168
Mannose-1-phosphate guanyltransferase alpha (GDP-mannose pyrophosphorylase A) (GTP-mannose-1-phosphate guanylyltransferase alpha)	Gmppa	GMPPA_MOUSE		X	46244
Probable gluconokinase (EC 2.7.1.12) (Gluconate kinase)	Idnk	GNTK_MOUSE		X	19981
Glutathione S-transferase Mu 6 (EC 2.5.1.18) (GST class-mu 6) (Glutathione-S-transferase class M5)	Gstm6 Gstm5	GSTM6_MOUSE		X	25621
Glutathione S-transferase omega-1 (GSTO-1) (EC 2.5.1.18) (Glutathione S-transferase omega 1-1) (GSTO 1-1) (Glutathione-dependent dehydroascorbate reductase) (EC 1.8.5.1) (Monomethylarsonic acid reductase) (MMA(V) reductase) (EC 1.20.4.2) (S-(Phenacyl)glutathione reductase) (SPG-R) (p28)	Gsto1 Gstx Gtsttl	GSTO1_MOUSE		X	27498
Glutathione S-transferase theta-2 (EC 2.5.1.18) (GST class-theta-2)	Gstt2	GSTT2_MOUSE		X	27634
Translation factor Guf1, mitochondrial (EC 3.6.5.-) (Elongation factor 4 homolog) (EF-4) (GTPase Guf1) (Ribosomal back-translocase)	Guf1	GUF1_MOUSE		X	72463
Histone H2B type 1-B (h2B-143)	Hist1h2bb	H2B1B_MOUSE		X	13952
Histone H3.3C (Embryonic)	H3f3c Gm14384	H3C_MOUSE		X	15315
Histone H4	Hist1h4a; Hist1h4b H4-53; Hist1h4c H4-12; Hist1h4d; Hist1h4f; Hist1h4h; Hist1h4i; Hist1h4j; Hist1h4k; Hist1h4m; Hist2h4a Hist2h4; Hist4h4	H4_MOUSE		X	11367
H-2 class I histocompatibility antigen, Q10 alpha chain	H2-Q10	HA10_MOUSE		X	37251
Hemoglobin subunit beta-2 (Beta-2-globin) (Hemoglobin beta-2 chain) (Hemoglobin beta-minor chain)	Hbb-b2	HBB2_MOUSE		X	15878
Haloacid dehalogenase-like hydrolase domain-containing protein 3	Hdhd3	HDHD3_MOUSE		X	28027
Delta-aminolevulinic acid dehydratase (ALADH) (EC 4.2.1.24) (Porphobilinogen synthase)	Alad Lv	HEM2_MOUSE		X	36024
Histamine N-methyltransferase (HMT) (EC 2.1.1.8)	Hnmt Hmt	HNMT_MOUSE		X	33665
Heterogeneous nuclear ribonucleoprotein H (hnRNP H) [Cleaved into: Heterogeneous nuclear ribonucleoprotein H, N-terminally processed]	Hnrnph1 Hnrph Hnrph1	HNRH1_MOUSE		X	49199
Heterogeneous nuclear ribonucleoprotein U (hnRNP U) (Scaffold attachment factor A) (SAF-A)	Hnrnpu Hnrpu	HNRPU_MOUSE		X	87918
Heat shock 70 kDa protein 1-like (Heat shock 70 kDa protein 1L) (Heat shock 70 kDa-like protein 1) (Spermatid-specific heat shock protein 70)	Hspa1l Hsc70t	HS71L_MOUSE		X	70637
Hydrocephalus-inducing protein (Protein Hy-3)	Hydin Hy3	HYDIN_MOUSE		X	581523
Epoxide hydrolase 1 (EC 3.3.2.9) (Epoxide hydratase) (Microsomal epoxide hydrolase)	Ephx1	HYEP_MOUSE		X	52577
Insulin-degrading enzyme (EC 3.4.24.56) (Insulin protease) (Insulinase) (Insulysin)	Ide	IDE_MOUSE		X	117772
Eukaryotic initiation factor 4A-III (eIF-4A-III) (eIF4A-III) (EC 3.6.4.13) (ATP-dependent RNA helicase DDX48) (ATP-dependent RNA helicase eIF4A-3) (DEAD box protein 48) (Eukaryotic translation initiation factor 4A isoform 3) [Cleaved into: Eukaryotic initiation factor 4A-III, N-terminally processed]	Eif4a3 Ddx48	IF4A3_MOUSE		X	46840
Eukaryotic translation initiation factor 5 (eIF-5)	Eif5	IF5_MOUSE		X	48968
Eukaryotic translation initiation factor 6 (eIF-6) (B4 integrin interactor) (CAB) (p27(BBP))	Eif6 Itgb4bp	IF6_MOUSE		X	26511
Importin subunit alpha-4 (Importin alpha Q2) (Qip2) (Karyopherin subunit alpha-3)	Kpna3 Qip2	IMA4_MOUSE		X	57773
Isochorismatase domain-containing protein 1	Isoc1	ISOC1_MOUSE		X	32033
Inter alpha-trypsin inhibitor, heavy chain 4 (ITI heavy chain H4) (ITI-HC4) (Inter-alpha-inhibitor heavy chain 4)	Itih4	ITIH4_MOUSE		X	104659
Inositol 1,4,5-trisphosphate receptor type 2 (IP3 receptor isoform 2) (IP3R 2) (InsP3R2) (Inositol 1,4,5-trisphosphate type V receptor) (Type 2 inositol 1,4,5-trisphosphate receptor) (Type 2 InsP3 receptor)	Itpr2 Itpr5	ITPR2_MOUSE		X	307475
Isovaleryl-CoA dehydrogenase, mitochondrial (IVD) (EC 1.3.8.4)	Ivd	IVD_MOUSE		X	46325
Keratin, type I cytoskeletal 13 (47 kDa cytokeratin) (Cytokeratin-13) (CK-13) (Keratin-13) (K13)	Krt13 Krt1-13	K1C13_MOUSE		X	47754
Keratin, type II cytoskeletal 71 (Cytokeratin-6G) (CK-6G) (Cytokeratin-71) (CK-71) (Keratin-6G) (K6G) (Keratin-71) (K71) (Type II inner root sheath-specific keratin-K6irs1) (mK6irs) (mK6irs1/Krt2-6g) (Type-II keratin Kb34)	Krt71 K6irs1 Kb34 Krt2-6g Krt6g	K2C71_MOUSE		X	57383
Keratin, type II cytoskeletal 79 (Cytokeratin-79) (CK-79) (Keratin-79) (K79) (Type-II keratin Kb38)	Krt79 Kb38	K2C79_MOUSE		X	57552
Adenylate kinase 2, mitochondrial (AK 2) (EC 2.7.4.3) (ATP-AMP transphosphorylase 2) (ATP:AMP phosphotransferase) (Adenylate monophosphate kinase)	Ak2	KAD2_MOUSE		X	26469
Katanin p60 ATPase-containing subunit A-like 2 (Katanin p60 subunit A-like 2) (EC 3.6.4.3) (p60 katanin-like 2)	Katnal2	KATL2_MOUSE		X	61153
Potassium voltage-gated channel subfamily S member 1 (Delayed-rectifier K(+) channel alpha subunit 1) (Voltage-gated potassium channel subunit Kv9.1)	Kcns1	KCNS1_MOUSE		X	54918
Kinesin-like protein KIF21B (Kinesin-like protein KIF6)	Kif21b Kif6	KI21B_MOUSE		X	186180
Kynurenine 3-monooxygenase (EC 1.14.13.9) (Kynurenine 3-hydroxylase)	Kmo	KMO_MOUSE		X	54532
Beta-lactamase-like protein 2 (EC 3.-.-.-)	Lactb2	LACB2_MOUSE		X	32754
L-lactate dehydrogenase B chain (LDH-B) (EC 1.1.1.27) (LDH heart subunit) (LDH-H)	Ldhb Ldh-2 Ldh2	LDHB_MOUSE		X	36572
Galectin-1 (Gal-1) (14 kDa lectin) (Beta-galactoside-binding lectin L-14-I) (Galaptin) (Lactose-binding lectin 1) (Lectin galactoside-binding soluble 1) (S-Lac lectin 1)	Lgals1 Gbp	LEG1_MOUSE		X	14866
Galectin-3 (Gal-3) (35 kDa lectin) (Carbohydrate-binding protein 35) (CBP 35) (Galactose-specific lectin 3) (IgE-binding protein) (L-34 galactoside-binding lectin) (Laminin-binding protein) (Lectin L-29) (Mac-2 antigen)	Lgals3	LEG3_MOUSE		X	27515
Liprin-alpha-2 (Protein tyrosine phosphatase receptor type f polypeptide-interacting protein alpha-2) (PTPRF-interacting protein alpha-2)	Ppfia2	LIPA2_MOUSE		X	143234
Liprin-alpha-3 (Protein tyrosine phosphatase receptor type f polypeptide-interacting protein alpha-3) (PTPRF-interacting protein alpha-3)	Ppfia3	LIPA3_MOUSE		X	116280
Lamin-B1	Lmnb1	LMNB1_MOUSE		X	66786
Prolow-density lipoprotein receptor-related protein 1 (LRP-1) (Alpha-2-macroglobulin receptor) (A2MR) (CD antigen CD91) [Cleaved into: Low-density lipoprotein receptor-related protein 1 85 kDa subunit (LRP-85); Low-density lipoprotein receptor-related protein 1 515 kDa subunit (LRP-515); Low-density lipoprotein receptor-related protein 1 intracellular domain (LRPICD)]	Lrp1 A2mr	LRP1_MOUSE		X	504742
Lysosomal-trafficking regulator (Beige protein) (CHS1 homolog)	Lyst Bg Chs1	LYST_MOUSE		X	425287
Mitogen-activated protein kinase kinase kinase kinase 4 (EC 2.7.11.1) (HPK/GCK-like kinase HGK) (MAPK/ERK kinase kinase kinase 4) (MEK kinase kinase 4) (MEKKK 4) (Nck-interacting kinase)	Map4k4 Nik	M4K4_MOUSE		X	140602
Melanoma-associated antigen D1 (Dlxin-1) (MAGE-D1 antigen) (Neurotrophin receptor-interacting MAGE homolog)	Maged1 Nrage	MAGD1_MOUSE		X	85670
Mitochondrial amidoxime reducing component 2 (mARC2) (EC 1.-.-.-) (Molybdenum cofactor sulfurase C-terminal domain-containing protein 2) (MOSC domain-containing protein 2) (Moco sulfurase C-terminal domain-containing protein 2)	Marc2 Mg87 Mosc2	MARC2_MOUSE		X	38194
Mannose-binding protein C (MBP-C) (Mannan-binding protein) (RA-reactive factor P28A subunit) (RARF/P28A)	Mbl2	MBL2_MOUSE		X	25957
Eukaryotic translation elongation factor 1 epsilon-1 (Elongation factor p18) (Multisynthase complex auxiliary component p18)	Eef1e1	MCA3_MOUSE		X	19859
Protein MEMO1 (Mediator of ErbB2-driven cell motility 1) (Memo-1)	Memo1	MEMO1_MOUSE		X	33692
Methyltransferase-like protein 7B (EC 2.1.1.-)	Mettl7b	MET7B_MOUSE		X	28049
MICOS complex subunit Mic60 (Mitochondrial inner membrane protein) (Mitofilin)	Immt Mic60	MIC60_MOUSE		X	83900
Multiple myeloma tumor-associated protein 2 homolog	Mmtag2	MMTA2_MOUSE		X	29299
Molybdenum cofactor sulfurase (MCS) (MOS) (MoCo sulfurase) (EC 2.8.1.9) (Molybdenum cofactor sulfurtransferase)	Mocos	MOCOS_MOUSE		X	95013
Protein MON2 homolog (Protein SF21)	Mon2 Kiaa1040 Sf21	MON2_MOUSE		X	189078
Proto-oncogene serine/threonine-protein kinase mos (EC 2.7.11.1) (Oocyte maturation factor mos) (Proto-oncogene c-Mos)	Mos	MOS_MOUSE		X	42875
Myosin light polypeptide 6 (17 kDa myosin light chain) (LC17) (Myosin light chain 3) (MLC-3) (Myosin light chain alkali 3) (Myosin light chain A3) (Smooth muscle and nonmuscle myosin light chain alkali 6)	Myl6 Myln	MYL6_MOUSE		X	16930
Myosin light chain kinase, smooth muscle (MLCK) (smMLCK) (EC 2.7.11.18) (Kinase-related protein) (KRP) (Telokin) [Cleaved into: Myosin light chain kinase, smooth muscle, deglutamylated form]	Mylk	MYLK_MOUSE		X	212925
Myosin-IIIa (EC 2.7.11.1)	Myo3a	MYO3A_MOUSE		X	184730
Unconventional myosin-VIIa	Myo7a Myo7	MYO7A_MOUSE		X	254939
Nucleoside diphosphate kinase A (NDK A) (NDP kinase A) (EC 2.7.4.6) (Metastasis inhibition factor NM23) (NDPK-A) (Tumor metastatic process-associated protein) (nm23-M1)	Nme1 Nm23	NDKA_MOUSE		X	17208
NADH dehydrogenase [ubiquinone] 1 alpha subcomplex subunit 6 (Complex I-B14) (CI-B14) (NADH-ubiquinone oxidoreductase B14 subunit)	Ndufa6	NDUA6_MOUSE		X	15283
NADH dehydrogenase [ubiquinone] 1 beta subcomplex subunit 4 (Complex I-B15) (CI-B15) (NADH-ubiquinone oxidoreductase B15 subunit)	Ndufb4	NDUB4_MOUSE		X	15081
NADH dehydrogenase [ubiquinone] 1 beta subcomplex subunit 11, mitochondrial (Complex I-ESSS) (CI-ESSS) (NADH-ubiquinone oxidoreductase ESSS subunit) (Neuronal protein 15.6) (Np15.6) (p15.6)	Ndufb11 Np15	NDUBB_MOUSE		X	17444
NADH dehydrogenase [ubiquinone] iron-sulfur protein 7, mitochondrial (EC 1.6.5.3) (EC 1.6.99.3) (Complex I-20kD) (CI-20kD) (NADH-ubiquinone oxidoreductase 20 kDa subunit)	Ndufs7	NDUS7_MOUSE		X	24683
NADH dehydrogenase [ubiquinone] iron-sulfur protein 8, mitochondrial (EC 1.6.5.3) (EC 1.6.99.3) (Complex I-23kD) (CI-23kD) (NADH-ubiquinone oxidoreductase 23 kDa subunit)	Ndufs8	NDUS8_MOUSE		X	24038
Neurofibromin (Neurofibromatosis-related protein NF-1)	Nf1	NF1_MOUSE		X	319596
H/ACA ribonucleoprotein complex subunit 2 (Nucleolar protein family A member 2) (snoRNP protein NHP2)	Nhp2 Nola2	NHP2_MOUSE		X	17247
Na(+)/H(+) exchange regulatory cofactor NHE-RF1 (NHERF-1) (Ezrin-radixin-moesin-binding phosphoprotein 50) (EBP50) (Regulatory cofactor of Na(+)/H(+) exchanger) (Sodium-hydrogen exchanger regulatory factor 1) (Solute carrier family 9 isoform A3 regulatory factor 1)	Slc9a3r1 Nherf Nherf1	NHRF1_MOUSE		X	38600
Glycylpeptide N-tetradecanoyltransferase 1 (EC 2.3.1.97) (Myristoyl-CoA:protein N-myristoyltransferase 1) (NMT 1) (Type I N-myristoyltransferase) (Peptide N-myristoyltransferase 1)	Nmt1	NMT1_MOUSE		X	56888
NAD(P)H-hydrate epimerase (EC 5.1.99.6) (Apolipoprotein A-I-binding protein) (AI-BP) (NAD(P)HX epimerase)	Apoa1bp Aibp	NNRE_MOUSE		X	30973
Bifunctional lysine-specific demethylase and histidyl-hydroxylase NO66 (EC 1.14.11.-) (EC 1.14.11.27) (Histone lysine demethylase NO66)	No66 Mapjd MNCb-7109	NO66_MOUSE		X	67557
Nucleolar pre-ribosomal-associated protein 1 (URB1 ribosome biogenesis 1 homolog)	Urb1 Kiaa0539 Npa1	NPA1P_MOUSE		X	254614
Nucleoside diphosphate-linked moiety X motif 19, mitochondrial (Nudix motif 19) (EC 3.6.1.-) (Androgen-regulated protein RP2) (Testosterone-regulated RP2 protein) (RP2p)	Nudt19 D7Rp2e	NUD19_MOUSE		X	40320
Obscurin-like protein 1	Obsl1	OBSL1_MOUSE		X	197937
Obg-like ATPase 1 (GTP-binding protein 9)	Ola1 Gtpbp9	OLA1_MOUSE		X	44730
Oxysterol-binding protein-related protein 1 (ORP-1) (OSBP-related protein 1)	Osbpl1a Orp1 Orp1a Orp1l	OSBL1_MOUSE		X	107795
Osteoclast-stimulating factor 1 (SH3 domain protein 3)	Ostf1 Sh3d3 Sh3p2	OSTF1_MOUSE		X	23783
Bifunctional 3'-phosphoadenosine 5'-phosphosulfate synthase 2 (PAPS synthase 2) (PAPSS 2) (Sulfurylase kinase 2) (SK 2) (SK2) [Includes: Sulfate adenylyltransferase (EC 2.7.7.4) (ATP-sulfurylase) (Sulfate adenylate transferase) (SAT); Adenylyl-sulfate kinase (EC 2.7.1.25) (3'-phosphoadenosine-5'-phosphosulfate synthase) (APS kinase) (Adenosine-5'-phosphosulfate 3'-phosphotransferase) (Adenylylsul…	Papss2 Atpsk2	PAPS2_MOUSE		X	70351
Prenylcysteine oxidase (EC 1.8.3.5)	Pcyox1 Kiaa0908	PCYOX_MOUSE		X	56495
Programmed cell death 6-interacting protein (ALG-2-interacting protein 1) (ALG-2-interacting protein X) (E2F1-inducible protein) (Eig2)	Pdcd6ip Aip1 Alix	PDC6I_MOUSE		X	96024
Protein disulfide-isomerase A5 (EC 5.3.4.1) (Protein disulfide isomerase-related protein)	Pdia5 Pdir	PDIA5_MOUSE		X	59267
Pyridoxal-dependent decarboxylase domain-containing protein 1 (EC 4.1.1.-)	Pdxdc1	PDXD1_MOUSE		X	87335
Pseudopodium-enriched atypical kinase 1 (EC 2.7.10.2) (Sugen kinase 269) (Tyrosine-protein kinase SgK269)	Peak1 Kiaa2002 Sgk269	PEAK1_MOUSE		X	191097
Phosphatidylethanolamine N-methyltransferase (PEAMT) (PEMT) (EC 2.1.1.17) (EC 2.1.1.71) (PEMT2)	Pemt Pempt Pemt2	PEMT_MOUSE		X	22579
Xaa-Pro dipeptidase (X-Pro dipeptidase) (EC 3.4.13.9) (Imidodipeptidase) (Peptidase 4) (Peptidase D) (Proline dipeptidase) (Prolidase)	Pepd Pep4	PEPD_MOUSE		X	55029
Phosphoglycerate kinase 2 (EC 2.7.2.3) (Phosphoglycerate kinase, testis specific)	Pgk2 Pgk-2	PGK2_MOUSE		X	44853
Phosphatidylinositol-binding clathrin assembly protein (Clathrin assembly lymphoid myeloid leukemia) (CALM)	Picalm Calm Fit1	PICAL_MOUSE		X	71543
Serine/threonine-protein kinase N1 (EC 2.7.11.13) (Protein kinase C-like 1) (Protein kinase C-like PKN) (Protein-kinase C-related kinase 1) (Serine-threonine protein kinase N)	Pkn1 Pkn Prk1 Prkcl1	PKN1_MOUSE		X	104411
1-acyl-sn-glycerol-3-phosphate acyltransferase alpha (EC 2.3.1.51) (1-acylglycerol-3-phosphate O-acyltransferase 1) (1-AGP acyltransferase 1) (1-AGPAT 1) (Lysophosphatidic acid acyltransferase alpha) (LPAAT-alpha)	Agpat1	PLCA_MOUSE		X	31709
Pleckstrin homology domain-containing family D member 1 (PH domain-containing family D member 1)	Plekhd1	PLHD1_MOUSE		X	59097
Nicotinate phosphoribosyltransferase (NAPRTase) (EC 6.3.4.21) (Nicotinate phosphoribosyltransferase domain-containing protein 1)	Naprt Naprt1	PNCB_MOUSE		X	58265
Serum paraoxonase/lactonase 3 (EC 3.1.1.2) (EC 3.1.1.81) (EC 3.1.8.1)	Pon3	PON3_MOUSE		X	39351
Serine/threonine-protein phosphatase PP1-alpha catalytic subunit (PP-1A) (EC 3.1.3.16)	Ppp1ca Ppp1a	PP1A_MOUSE		X	37540
Low molecular weight phosphotyrosine protein phosphatase (LMW-PTP) (LMW-PTPase) (EC 3.1.3.48) (Low molecular weight cytosolic acid phosphatase) (EC 3.1.3.2)	Acp1	PPAC_MOUSE		X	18192
Prolyl endopeptidase (PE) (EC 3.4.21.26) (Post-proline cleaving enzyme)	Prep Pep	PPCE_MOUSE		X	80752
Ribose-phosphate pyrophosphokinase 1 (EC 2.7.6.1) (Phosphoribosyl pyrophosphate synthase I) (PRS-I)	Prps1	PRPS1_MOUSE		X	34834
26S protease regulatory subunit 10B (26S proteasome AAA-ATPase subunit RPT4) (Proteasome 26S subunit ATPase 6) (Proteasome subunit p42)	Psmc6 Sug2	PRS10_MOUSE		X	44173
26S protease regulatory subunit 6B (26S proteasome AAA-ATPase subunit RPT3) (CIP21) (MB67-interacting protein) (MIP224) (Proteasome 26S subunit ATPase 4) (Tat-binding protein 7) (TBP-7)	Psmc4 Tbp7	PRS6B_MOUSE		X	47408
Proteasome subunit beta type-1 (EC 3.4.25.1) (Macropain subunit C5) (Multicatalytic endopeptidase complex subunit C5) (Proteasome component C5) (Proteasome gamma chain)	Psmb1	PSB1_MOUSE		X	26372
26S proteasome non-ATPase regulatory subunit 14 (EC 3.4.19.-) (26S proteasome regulatory subunit RPN11) (MAD1)	Psmd14 Pad1	PSDE_MOUSE		X	34577
26S proteasome non-ATPase regulatory subunit 1 (26S proteasome regulatory subunit RPN2) (26S proteasome regulatory subunit S1)	Psmd1	PSMD1_MOUSE		X	105730
26S proteasome non-ATPase regulatory subunit 4 (26S proteasome regulatory subunit RPN10) (26S proteasome regulatory subunit S5A) (Multiubiquitin chain-binding protein)	Psmd4 Mcb1	PSMD4_MOUSE		X	40704
26S proteasome non-ATPase regulatory subunit 6 (26S proteasome regulatory subunit RPN7) (26S proteasome regulatory subunit S10) (p42A)	Psmd6	PSMD6_MOUSE		X	45536
26S proteasome non-ATPase regulatory subunit 7 (26S proteasome regulatory subunit RPN8) (26S proteasome regulatory subunit S12) (Mov34 protein) (Proteasome subunit p40)	Psmd7 Mov-34 Mov34	PSMD7_MOUSE		X	36540
Proteasome activator complex subunit 1 (11S regulator complex subunit alpha) (REG-alpha) (Activator of multicatalytic protease subunit 1) (Proteasome activator 28 subunit alpha) (PA28a) (PA28alpha)	Psme1	PSME1_MOUSE		X	28673
Prostaglandin reductase-3	Zadh2, Ptgr3	PTGR3_MOUSE		X	40529
Transcriptional activator protein Pur-beta (Purine-rich element-binding protein B) (Vascular actin single-stranded DNA-binding factor 2 p44 component)	Purb	PURB_MOUSE		X	33901
Peroxisomal membrane protein 2 (22 kDa peroxisomal membrane protein)	Pxmp2 Pmp22	PXMP2_MOUSE		X	22266
Quinone oxidoreductase-like protein 2 (EC 1.-.-.-)	0	QORL2_MOUSE		X	37809
Ras-related protein Rab-7a	Rab7a Rab7	RAB7A_MOUSE		X	23490
Ras-related protein Rab-8B	Rab8b	RAB8B_MOUSE		X	23603
Ras-related protein Rap-1b (GTP-binding protein smg p21B)	Rap1b	RAP1B_MOUSE		X	20825
RasGAP-activating-like protein 1	Rasal1 Rasal	RASL1_MOUSE		X	89395
E3 SUMO-protein ligase RanBP2 (EC 6.3.2.-) (Ran-binding protein 2) (RanBP2)	Ranbp2	RBP2_MOUSE		X	341121
Receptor expression-enhancing protein 6 (Polyposis locus protein 1-like 1) (TB2 protein-like 1)	Reep6 Dp1l1 Tb2l1	REEP6_MOUSE		X	22204
Ral guanine nucleotide dissociation stimulator-like 1 (RalGDS-like 1)	Rgl1 Rgl	RGL1_MOUSE		X	86324
Transforming protein RhoA	Rhoa Arha Arha2	RHOA_MOUSE		X	21782
60S ribosomal protein L22 (Heparin-binding protein HBp15)	Rpl22	RL22_MOUSE		X	14759
60S ribosomal protein L24	Rpl24	RL24_MOUSE		X	17779
60S ribosomal protein L27a (L29)	Rpl27a	RL27A_MOUSE		X	16605
60S ribosomal protein L3 (J1 protein)	Rpl3	RL3_MOUSE		X	46110
60S ribosomal protein L31	Rpl31	RL31_MOUSE		X	14463
60S ribosomal protein L6 (TAX-responsive enhancer element-binding protein 107) (TAXREB107)	Rpl6	RL6_MOUSE		X	33510
60S ribosomal protein L7	Rpl7	RL7_MOUSE		X	31420
60S acidic ribosomal protein P1	Rplp1	RLA1_MOUSE		X	11475
Regulator of microtubule dynamics protein 1 (RMD-1) (mRMD-1) (Microtubule-associated protein) (Protein FAM82B)	Rmdn1 Fam82b	RMD1_MOUSE		X	35000
Heterogeneous nuclear ribonucleoproteins A2/B1 (hnRNP A2/B1)	Hnrnpa2b1 Hnrpa2b1	ROA2_MOUSE		X	37403
Protein RRP5 homolog (Apoptosis-linked gene 4 protein) (Programmed cell death protein 11)	Pdcd11 Alg4 Kiaa0185	RRP5_MOUSE		X	207779
40S ribosomal protein S10	Rps10	RS10_MOUSE		X	18916
40S ribosomal protein S11	Rps11	RS11_MOUSE		X	18431
40S ribosomal protein S15 (RIG protein)	Rps15 Rig	RS15_MOUSE		X	17040
40S ribosomal protein S15a	Rps15a	RS15A_MOUSE		X	14840
40S ribosomal protein S17	Rps17	RS17_MOUSE		X	15524
40S ribosomal protein S27-like	Rps27l	RS27L_MOUSE		X	9477
40S ribosomal protein S9	Rps9	RS9_MOUSE		X	22591
Small nuclear ribonucleoprotein-associated protein B (snRNP-B) (snRPB) (Sm protein B) (Sm-B) (SmB)	Snrpb	RSMB_MOUSE		X	23656
28S ribosomal protein S27, mitochondrial (MRP-S27) (S27mt)	Mrps27	RT27_MOUSE		X	47779
SEC14-like protein 1	Sec14l1	S14L1_MOUSE		X	81250
Very long-chain acyl-CoA synthetase (VLACS) (VLCS) (EC 6.2.1.-) (Fatty acid transport protein 2) (FATP-2) (Fatty-acid-coenzyme A ligase, very long-chain 1) (Long-chain-fatty-acid--CoA ligase) (EC 6.2.1.3) (Solute carrier family 27 member 2) (THCA-CoA ligase) (Very long-chain-fatty-acid-CoA ligase)	Slc27a2 Acsvl1 Facvl1 Fatp2 Vlacs Vlcs	S27A2_MOUSE		X	70423
Bile acyl-CoA synthetase (BACS) (EC 6.2.1.7) (Bile acid-CoA ligase) (BA-CoA ligase) (BAL) (Cholate--CoA ligase) (Fatty acid transport protein 5) (FATP-5) (Solute carrier family 27 member 5) (Very long-chain acyl-CoA synthetase-related protein) (VLACS-related) (VLACSR)	Slc27a5 Acsb Acsvl6 Fatp5 Vlacsr	S27A5_MOUSE		X	76203
Multidrug and toxin extrusion protein 2 (MATE-2) (mMATE-2) (H(+)/organic cation antiporter kidney-specific) (Solute carrier family 47 member 2)	Slc47a2 Mate2	S47A2_MOUSE		X	61789
SUMO-activating enzyme subunit 1 (Ubiquitin-like 1-activating enzyme E1A) [Cleaved into: SUMO-activating enzyme subunit 1, N-terminally processed]	Sae1 Aos1 Sua1 Ubl1a1 Uble1a	SAE1_MOUSE		X	38620
Deoxynucleoside triphosphate triphosphohydrolase SAMHD1 (dNTPase) (EC 3.1.5.-) (Interferon-gamma-inducible protein Mg11) (SAM domain and HD domain-containing protein 1)	Samhd1 Mg11	SAMH1_MOUSE		X	72650
GTP-binding protein SAR1a	Sar1a Sara Sara1	SAR1A_MOUSE		X	22371
GTP-binding protein SAR1b	Sar1b Sara1b Sara2	SAR1B_MOUSE		X	22382
Protein transport protein Sec24A (SEC24-related protein A)	Sec24a	SC24A_MOUSE		X	118782
Protein transport protein Sec31B (SEC31-like protein 2) (SEC31-related protein B)	Sec31b Gm341 Sec31l2	SC31B_MOUSE		X	125633
Selenocysteine lyase (mSCL) (EC 4.4.1.16)	Scly Scl	SCLY_MOUSE		X	47174
Protein SEC13 homolog (SEC13-like protein 1) (SEC13-related protein)	Sec13 Sec13l1	SEC13_MOUSE		X	35566
Selenoprotein O (SelO)	Selo	SELO_MOUSE		X	74221
Septin-10	Sept10	SEP10_MOUSE		X	52422
15 kDa selenoprotein	Selenof	SEP15_MOUSE		X	17806
Septin-9 (SL3-3 integration site 1 protein)	Sept9 Kiaa0991 Sint1	SEPT9_MOUSE		X	65575
Histone-lysine N-methyltransferase setd3 (EC 2.1.1.43) (Endothelial differentiation inhibitory protein D10) (SET domain-containing protein 3)	Setd3 D12Ertd771e	SETD3_MOUSE		X	67176
Sideroflexin-1	Sfxn1 F	SFXN1_MOUSE		X	35649
SH3 and multiple ankyrin repeat domains protein 3 (Shank3) (Proline-rich synapse-associated protein 2) (ProSAP2) (SPANK-2)	Shank3 Kiaa1650 Prosap2	SHAN3_MOUSE		X	185397
Sedoheptulokinase (SHK) (EC 2.7.1.14) (Carbohydrate kinase-like protein)	Shpk Carkl	SHPK_MOUSE		X	51303
Structural maintenance of chromosomes protein 3 (SMC protein 3) (SMC-3) (Basement membrane-associated chondroitin proteoglycan) (Bamacan) (Chondroitin sulfate proteoglycan 6) (Chromosome segregation protein SmcD) (Mad member-interacting protein 1)	Smc3 Bam Bmh Cspg6 Mmip1 Smc3l1 Smcd	SMC3_MOUSE		X	141556
Signal recognition particle receptor subunit beta (SR-beta)	Srprb	SRPRB_MOUSE		X	29579
Succinate-semialdehyde dehydrogenase, mitochondrial (EC 1.2.1.24) (Aldehyde dehydrogenase family 5 member A1) (NAD(+)-dependent succinic semialdehyde dehydrogenase)	Aldh5a1	SSDH_MOUSE		X	55968
Bile salt sulfotransferase 2 (EC 2.8.2.14) (Hydroxysteroid sulfotransferase) (ST) (Sulfotransferase 2A2) (ST2A2)	Sult2a2 Sta2 Sth2	ST2A2_MOUSE		X	33329
Amine sulfotransferase (EC 2.8.2.3) (SULT-X2) (Sulfotransferase 3A1) (ST3A1)	Sult3a1 St3a1	ST3A1_MOUSE		X	35181
Stomatin-like protein 2, mitochondrial (SLP-2) (mslp2)	Stoml2 Slp2	STML2_MOUSE		X	38385
Syntaxin-8 (Syntaxin-like protein 3I35)	Stx8	STX8_MOUSE		X	26925
Probable histidine--tRNA ligase, mitochondrial (EC 6.1.1.21) (Histidine--tRNA ligase-like) (Histidyl-tRNA synthetase) (HisRS)	Hars2 Harsl	SYHM_MOUSE		X	56985
Isoleucine--tRNA ligase, mitochondrial (EC 6.1.1.5) (Isoleucyl-tRNA synthetase) (IleRS)	Iars2	SYIM_MOUSE		X	112804
Leucine--tRNA ligase, cytoplasmic (EC 6.1.1.4) (Leucyl-tRNA synthetase) (LeuRS)	Lars	SYLC_MOUSE		X	134192
Arginine--tRNA ligase, cytoplasmic (EC 6.1.1.19) (Arginyl-tRNA synthetase) (ArgRS)	Rars	SYRC_MOUSE		X	75674
Trans-L-3-hydroxyproline dehydratase (EC 4.2.1.77) (Trans-3-hydroxy-L-proline dehydratase)	L3hypdh	T3HPD_MOUSE		X	37804
TAR DNA-binding protein 43 (TDP-43)	Tardbp Tdp43	TADBP_MOUSE		X	44548
Protein TANC2 (Tetratricopeptide repeat, ankyrin repeat and coiled-coil domain-containing protein 2)	Tanc2 Kiaa1148	TANC2_MOUSE		X	220263
Tubulin alpha-1B chain (Alpha-tubulin 2) (Alpha-tubulin isotype M-alpha-2) (Tubulin alpha-2 chain)	Tuba1b Tuba2	TBA1B_MOUSE		X	50152
Tubulin beta-2B chain	Tubb2b	TBB2B_MOUSE		X	49953
Tubulin beta-5 chain	Tubb5	TBB5_MOUSE		X	49671
T-complex protein 1 subunit zeta (TCP-1-zeta) (CCT-zeta-1)	Cct6a Cct6 Cctz Cctz1	TCPZ_MOUSE		X	58004
Thyroid hormone-inducible hepatic protein (Spot 14 protein) (S14) (SPOT14)	Thrsp S14	THRSP_MOUSE		X	17093
3-mercaptopyruvate sulfurtransferase (MST) (EC 2.8.1.2)	Mpst	THTM_MOUSE		X	33023
Mitochondrial import inner membrane translocase subunit TIM50	Timm50 Tim50	TIM50_MOUSE		X	39776
Troponin I, fast skeletal muscle (Troponin I, fast-twitch isoform)	Tnni2	TNNI2_MOUSE		X	21358
Transportin-1 (Importin beta-2) (Karyopherin beta-2)	Tnpo1 Kpnb2	TNPO1_MOUSE		X	102357
Mitochondrial import receptor subunit TOM22 homolog (Translocase of outer membrane 22 kDa subunit homolog)	Tomm22 Tom22	TOM22_MOUSE		X	15537
Tripeptidyl-peptidase 1 (TPP-1) (EC 3.4.14.9) (Lysosomal pepstatin-insensitive protease) (LPIC) (Tripeptidyl aminopeptidase) (Tripeptidyl-peptidase I) (TPP-I)	Tpp1 Cln2	TPP1_MOUSE		X	61342
Serotransferrin (Transferrin) (Beta-1 metal-binding globulin) (Siderophilin)	Tf Trf	TRFE_MOUSE		X	76724
E3 ubiquitin-protein ligase TRIP12 (EC 6.3.2.-) (Thyroid receptor-interacting protein 12) (TR-interacting protein 12) (TRIP-12)	Trip12	TRIPC_MOUSE		X	224128
Thioredoxin reductase 1, cytoplasmic (TR) (EC 1.8.1.9) (Thioredoxin reductase TR1)	Txnrd1 Trxr1	TRXR1_MOUSE		X	67084
Twinfilin-1 (Protein A6)	Twf1 Ptk9	TWF1_MOUSE		X	40079
116 kDa U5 small nuclear ribonucleoprotein component (Elongation factor Tu GTP-binding domain-containing protein 2) (U5 snRNP-specific protein, 116 kDa) (U5-116 kDa)	Eftud2 Snrp116	U5S1_MOUSE		X	109361
Ubiquitin-conjugating enzyme E2 variant 2 (Ubc-like protein MMS2)	Ube2v2 Mms2 Uev2	UB2V2_MOUSE		X	16367
Ubiquitin-like modifier-activating enzyme 5 (Ubiquitin-activating enzyme 5) (UFM1-activating enzyme) (Ubiquitin-activating enzyme E1 domain-containing protein 1)	Uba5 Ube1dc1	UBA5_MOUSE		X	44790
E3 ubiquitin-protein ligase UBR2 (EC 6.3.2.-) (N-recognin-2) (Ubiquitin-protein ligase E3-alpha-2) (Ubiquitin-protein ligase E3-alpha-II)	Ubr2 Kiaa0349	UBR2_MOUSE		X	199155
UDP-glucuronosyltransferase 1-1 (UDPGT 1-1) (UGT1*1) (UGT1-01) (UGT1.1) (EC 2.4.1.17) (UDP-glucuronosyltransferase 1A1) (UGTBR1)	Ugt1a1 Ugt1	UD11_MOUSE		X	60047
UDP-glucuronosyltransferase 1-6 (UDPGT 1-6) (UGT1*6) (UGT1-06) (UGT1.6) (EC 2.4.1.17) (Phenol UDP-glucuronosyltransferase) (UDP-glucuronosyltransferase 1A6) (UGT1A6) (UGP1A1) (UGT1A7)	Ugt1a6 Ugt1 Ugt1a6a Ugt1a7	UD16_MOUSE		X	60439
Uridine phosphorylase 2 (UPase 2) (UrdPase 2) (EC 2.4.2.3) (Liver-specific uridine phosphorylase) (L-UrdPase)	Upp2	UPP2_MOUSE		X	35755
Probable ubiquitin carboxyl-terminal hydrolase FAF-X (EC 3.4.19.12) (Deubiquitinating enzyme FAF-X) (Fat facets homolog) (Fat facets protein-related, X-linked) (Ubiquitin carboxyl-terminal hydrolase FAM) (Ubiquitin thioesterase FAF-X) (Ubiquitin-specific protease 9, X chromosome) (Ubiquitin-specific-processing protease FAF-X)	Usp9x Fafl Fam	USP9X_MOUSE		X	290711
von Willebrand factor A domain-containing protein 8	Vwa8 Kiaa0564	VWA8_MOUSE		X	213421
WD repeat-containing protein 1 (Actin-interacting protein 1) (AIP1)	Wdr1	WDR1_MOUSE		X	66407
Xanthine dehydrogenase/oxidase [Includes: Xanthine dehydrogenase (XD) (EC 1.17.1.4); Xanthine oxidase (XO) (EC 1.17.3.2) (Xanthine oxidoreductase) (XOR)]	Xdh	XDH_MOUSE		X	146562
Zonadhesin	Zan	ZAN_MOUSE		X	579913
Zinc finger ZZ-type and EF-hand domain-containing protein 1	Zzef1 Kiaa0399	ZZEF1_MOUSE		X	328312
		total	731	966
