# Supplementary material for: Elevated Nrf-2 responses are insufficient to mitigate protein carbonylation in hepatospecific PTEN deletion mice
Source: PLoS One. 2018 May 25;13(5):e0198139. doi: 10.1371/journal.pone.0198139 (PMC5969769; doi:10.1371/journal.pone.0198139)
Supplement: S3 Table — (XLSX) [file pone.0198139.s004.xlsx]

## Sheet: S3 Table 
S3 Table: Comparison of carbonylated proteins identified in PTENLKO mice with carbonylted proteins identified in other murine models using identical methods
Names	total	elements
PTEN in common with other genotypes and treatments	815	RL22_MOUSE NAKD2_MOUSE SUCA_MOUSE GCDH_MOUSE IMB1_MOUSE IF4A2_MOUSE GSH1_MOUSE RS13_MOUSE EPHB6_MOUSE NMT1_MOUSE GGLO_MOUSE ROA3_MOUSE GLPK_MOUSE PGK1_MOUSE THTR_MOUSE GLU2B_MOUSE UBA1_MOUSE IPYR_MOUSE NDUS7_MOUSE DPP2_MOUSE RL17_MOUSE DPYD_MOUSE RS12_MOUSE RL15_MOUSE EF1A1_MOUSE ALDOA_MOUSE CP2A5_MOUSE PLCA_MOUSE RL10A_MOUSE LIPA3_MOUSE AQP1_MOUSE MYO7A_MOUSE SEC13_MOUSE PRDX1_MOUSE DX39B_MOUSE …
unique to PTEN	78	ADH7_MOUSE SAE1_MOUSE PLHD1_MOUSE PDXD1_MOUSE ERP29_MOUSE DUS3_MOUSE MOCOS_MOUSE RT27_MOUSE RS15_MOUSE LIPA2_MOUSE HNMT_MOUSE TWF1_MOUSE TIM50_MOUSE UBA5_MOUSE C2TA_MOUSE OSBL1_MOUSE AMPB_MOUSE PEMT_MOUSE NNRE_MOUSE CC112_MOUSE RBP2_MOUSE PGK2_MOUSE IDE_MOUSE NDUB4_MOUSE IF6_MOUSE T3HPD_MOUSE LMNB1_MOUSE PURB_MOUSE ALDR_MOUSE PSMD4_MOUSE SYHM_MOUSE AIMP1_MOUSE GGT7_MOUSE ACOT5_MOUSE MON2_MOUSE ES…
Not present in PTEN	1540	PPRC1_MOUSE ZSC20_MOUSE CTXN1_MOUSE UBB_MOUSE NPL4_MOUSE SPAT5_MOUSE SPA3N_MOUSE MET14_MOUSE H10_MOUSE ENASE_MOUSE CBR4_MOUSE ILRL1_MOUSE TRI35_MOUSE PLSL_MOUSE TUT4_MOUSE SRSF7_MOUSE RS27L_MOUSE RN181_MOUSE FUT11_MOUSE TLK2_MOUSE P4HA2_MOUSE GSHR_MOUSE ANX11_MOUSE DCAF6_MOUSE H2B3A_MOUSE MTG1_MOUSE LGI2_MOUSE K1522_MOUSE PIEZ2_MOUSE CP240_MOUSE CREB5_MOUSE PLCB3_MOUSE CAZA2_MOUSE 5HT6R_MOUSE KI2…
